# Supplementary material for: Stability of the vaginal, oral, and gut microbiota across pregnancy among African American women: the effect of socioeconomic status and antibiotic exposure
Source: PeerJ. 2019 Nov 21;7:e8004. doi: 10.7717/peerj.8004 (PMC6875384; doi:10.7717/peerj.8004)
Supplement: Data S1 [file peerj-07-8004-s001.xlsx]

## Sheet: dbGapSubject & Sample IDs
StudySampleName	StudySampleMap	StudySampleID	dbgapSubject	dbgapSample	dbgapFastq
EIGC9_037_S1_L001_R1_001.fastq.gz	EIGC9.037	G0014-1-VagM1	AAMP43	AAMP43-1-VagM1	EIGC9_037_S1_L001_R1_001.fastq.gz
EIGC9_037_S1_L001_R2_001.fastq.gz	EIGC9.037	G0014-1-VagM1	AAMP43	AAMP43-1-VagM1	EIGC9_037_S1_L001_R2_001.fastq.gz
EIGC9_038_S72_L001_R1_001.fastq.gz	EIGC9.038	G0014-1-OraM1	AAMP43	AAMP43-1-OraM1	EIGC9_038_S72_L001_R1_001.fastq.gz
EIGC9_038_S72_L001_R2_001.fastq.gz	EIGC9.038	G0014-1-OraM1	AAMP43	AAMP43-1-OraM1	EIGC9_038_S72_L001_R2_001.fastq.gz
EIGC9_039_S76_L001_R1_001.fastq.gz	EIGC9.039	G0014-1-RecM1	AAMP43	AAMP43-1-RecM1	EIGC9_039_S76_L001_R1_001.fastq.gz
EIGC9_039_S76_L001_R2_001.fastq.gz	EIGC9.039	G0014-1-RecM1	AAMP43	AAMP43-1-RecM1	EIGC9_039_S76_L001_R2_001.fastq.gz
EIGC9_040_S26_L001_R1_001.fastq.gz	EIGC9.040	G0014-2-VagM1	AAMP43	AAMP43-2-VagM1	EIGC9_040_S26_L001_R1_001.fastq.gz
EIGC9_040_S26_L001_R2_001.fastq.gz	EIGC9.040	G0014-2-VagM1	AAMP43	AAMP43-2-VagM1	EIGC9_040_S26_L001_R2_001.fastq.gz
EIGC9_041_S79_L001_R1_001.fastq.gz	EIGC9.041	G0014-2-OraM1	AAMP43	AAMP43-2-OraM1	EIGC9_041_S79_L001_R1_001.fastq.gz
EIGC9_041_S79_L001_R2_001.fastq.gz	EIGC9.041	G0014-2-OraM1	AAMP43	AAMP43-2-OraM1	EIGC9_041_S79_L001_R2_001.fastq.gz
EIGC9_042_S42_L001_R1_001.fastq.gz	EIGC9.042	G0014-2-RecM1	AAMP43	AAMP43-2-RecM1	EIGC9_042_S42_L001_R1_001.fastq.gz
EIGC9_042_S42_L001_R2_001.fastq.gz	EIGC9.042	G0014-2-RecM1	AAMP43	AAMP43-2-RecM1	EIGC9_042_S42_L001_R2_001.fastq.gz
EIGC9_043_S52_L001_R1_001.fastq.gz	EIGC9.043	G0015-1-VagM1	AAMP44	AAMP44-1-VagM1	EIGC9_043_S52_L001_R1_001.fastq.gz
EIGC9_043_S52_L001_R2_001.fastq.gz	EIGC9.043	G0015-1-VagM1	AAMP44	AAMP44-1-VagM1	EIGC9_043_S52_L001_R2_001.fastq.gz
EIGC9_044_S82_L001_R1_001.fastq.gz	EIGC9.044	G0015-1-OraM1	AAMP44	AAMP44-1-OraM1	EIGC9_044_S82_L001_R1_001.fastq.gz
EIGC9_044_S82_L001_R2_001.fastq.gz	EIGC9.044	G0015-1-OraM1	AAMP44	AAMP44-1-OraM1	EIGC9_044_S82_L001_R2_001.fastq.gz
EIGC9_045_S85_L001_R1_001.fastq.gz	EIGC9.045	G0015-1-RecM1	AAMP44	AAMP44-1-RecM1	EIGC9_045_S85_L001_R1_001.fastq.gz
EIGC9_045_S85_L001_R2_001.fastq.gz	EIGC9.045	G0015-1-RecM1	AAMP44	AAMP44-1-RecM1	EIGC9_045_S85_L001_R2_001.fastq.gz
EIGC9_046_S10_L001_R1_001.fastq.gz	EIGC9.046	G0015-2-VagM1	AAMP44	AAMP44-2-VagM1	EIGC9_046_S10_L001_R1_001.fastq.gz
EIGC9_046_S10_L001_R2_001.fastq.gz	EIGC9.046	G0015-2-VagM1	AAMP44	AAMP44-2-VagM1	EIGC9_046_S10_L001_R2_001.fastq.gz
EIGC9_047_S18_L001_R1_001.fastq.gz	EIGC9.047	G0015-2-OraM1	AAMP44	AAMP44-2-OraM1	EIGC9_047_S18_L001_R1_001.fastq.gz
EIGC9_047_S18_L001_R2_001.fastq.gz	EIGC9.047	G0015-2-OraM1	AAMP44	AAMP44-2-OraM1	EIGC9_047_S18_L001_R2_001.fastq.gz
EIGC9_048_S88_L001_R1_001.fastq.gz	EIGC9.048	G0015-2-RecM1	AAMP44	AAMP44-2-RecM1	EIGC9_048_S88_L001_R1_001.fastq.gz
EIGC9_048_S88_L001_R2_001.fastq.gz	EIGC9.048	G0015-2-RecM1	AAMP44	AAMP44-2-RecM1	EIGC9_048_S88_L001_R2_001.fastq.gz
EIGC9_050_S43_L001_R1_001.fastq.gz	EIGC9.050	G0016-1-OraM1	AAMP45	AAMP45-1-OraM1	EIGC9_050_S43_L001_R1_001.fastq.gz
EIGC9_050_S43_L001_R2_001.fastq.gz	EIGC9.050	G0016-1-OraM1	AAMP45	AAMP45-1-OraM1	EIGC9_050_S43_L001_R2_001.fastq.gz
EIGC9_051_S53_L001_R1_001.fastq.gz	EIGC9.051	G0016-1-RecM1	AAMP45	AAMP45-1-RecM1	EIGC9_051_S53_L001_R1_001.fastq.gz
EIGC9_051_S53_L001_R2_001.fastq.gz	EIGC9.051	G0016-1-RecM1	AAMP45	AAMP45-1-RecM1	EIGC9_051_S53_L001_R2_001.fastq.gz
EIGC9_053_S2_L001_R1_001.fastq.gz	EIGC9.053	G0016-2-OraM1	AAMP45	AAMP45-2-OraM1	EIGC9_053_S2_L001_R1_001.fastq.gz
EIGC9_053_S2_L001_R2_001.fastq.gz	EIGC9.053	G0016-2-OraM1	AAMP45	AAMP45-2-OraM1	EIGC9_053_S2_L001_R2_001.fastq.gz
EIGC9_054_S11_L001_R1_001.fastq.gz	EIGC9.054	G0016-2-RecM1	AAMP45	AAMP45-2-RecM1	EIGC9_054_S11_L001_R1_001.fastq.gz
EIGC9_054_S11_L001_R2_001.fastq.gz	EIGC9.054	G0016-2-RecM1	AAMP45	AAMP45-2-RecM1	EIGC9_054_S11_L001_R2_001.fastq.gz
EIGC9_055_S19_L001_R1_001.fastq.gz	EIGC9.055	G0017-1-VagM1	AAMP46	AAMP46-1-VagM1	EIGC9_055_S19_L001_R1_001.fastq.gz
EIGC9_055_S19_L001_R2_001.fastq.gz	EIGC9.055	G0017-1-VagM1	AAMP46	AAMP46-1-VagM1	EIGC9_055_S19_L001_R2_001.fastq.gz
EIGC9_056_S27_L001_R1_001.fastq.gz	EIGC9.056	G0017-1-OraM1	AAMP46	AAMP46-1-OraM1	EIGC9_056_S27_L001_R1_001.fastq.gz
EIGC9_056_S27_L001_R2_001.fastq.gz	EIGC9.056	G0017-1-OraM1	AAMP46	AAMP46-1-OraM1	EIGC9_056_S27_L001_R2_001.fastq.gz
EIGC9_057_S34_L001_R1_001.fastq.gz	EIGC9.057	G0017-1-RecM1	AAMP46	AAMP46-1-RecM1	EIGC9_057_S34_L001_R1_001.fastq.gz
EIGC9_057_S34_L001_R2_001.fastq.gz	EIGC9.057	G0017-1-RecM1	AAMP46	AAMP46-1-RecM1	EIGC9_057_S34_L001_R2_001.fastq.gz
EIGC9_058_S44_L001_R1_001.fastq.gz	EIGC9.058	G0017-2-VagM1	AAMP46	AAMP46-2-VagM1	EIGC9_058_S44_L001_R1_001.fastq.gz
EIGC9_058_S44_L001_R2_001.fastq.gz	EIGC9.058	G0017-2-VagM1	AAMP46	AAMP46-2-VagM1	EIGC9_058_S44_L001_R2_001.fastq.gz
EIGC9_059_S54_L001_R1_001.fastq.gz	EIGC9.059	G0017-2-OraM1	AAMP46	AAMP46-2-OraM1	EIGC9_059_S54_L001_R1_001.fastq.gz
EIGC9_059_S54_L001_R2_001.fastq.gz	EIGC9.059	G0017-2-OraM1	AAMP46	AAMP46-2-OraM1	EIGC9_059_S54_L001_R2_001.fastq.gz
EIGC9_060_S91_L001_R1_001.fastq.gz	EIGC9.060	G0017-2-RecM1	AAMP46	AAMP46-2-RecM1	EIGC9_060_S91_L001_R1_001.fastq.gz
EIGC9_060_S91_L001_R2_001.fastq.gz	EIGC9.060	G0017-2-RecM1	AAMP46	AAMP46-2-RecM1	EIGC9_060_S91_L001_R2_001.fastq.gz
EIGC9_066_S94_L001_R1_001.fastq.gz	EIGC9.066	G0026-1-OraM1	AAMP48	AAMP48-1-OraM1	EIGC9_066_S94_L001_R1_001.fastq.gz
EIGC9_066_S94_L001_R2_001.fastq.gz	EIGC9.066	G0026-1-OraM1	AAMP48	AAMP48-1-OraM1	EIGC9_066_S94_L001_R2_001.fastq.gz
EIGC9_067_S55_L001_R1_001.fastq.gz	EIGC9.067	G0026-1-RecM1	AAMP48	AAMP48-1-RecM1	EIGC9_067_S55_L001_R1_001.fastq.gz
EIGC9_067_S55_L001_R2_001.fastq.gz	EIGC9.067	G0026-1-RecM1	AAMP48	AAMP48-1-RecM1	EIGC9_067_S55_L001_R2_001.fastq.gz
EIGC9_069_S4_L001_R1_001.fastq.gz	EIGC9.069	G0026-2-OraM1	AAMP48	AAMP48-2-OraM1	EIGC9_069_S4_L001_R1_001.fastq.gz
EIGC9_069_S4_L001_R2_001.fastq.gz	EIGC9.069	G0026-2-OraM1	AAMP48	AAMP48-2-OraM1	EIGC9_069_S4_L001_R2_001.fastq.gz
EIGC9_070_S73_L001_R1_001.fastq.gz	EIGC9.070	G0026-2-RecM1	AAMP48	AAMP48-2-RecM1	EIGC9_070_S73_L001_R1_001.fastq.gz
EIGC9_070_S73_L001_R2_001.fastq.gz	EIGC9.070	G0026-2-RecM1	AAMP48	AAMP48-2-RecM1	EIGC9_070_S73_L001_R2_001.fastq.gz
EIGC9_071_S21_L001_R1_001.fastq.gz	EIGC9.071	G0027-1-VagM1	AAMP49	AAMP49-1-VagM1	EIGC9_071_S21_L001_R1_001.fastq.gz
EIGC9_071_S21_L001_R2_001.fastq.gz	EIGC9.071	G0027-1-VagM1	AAMP49	AAMP49-1-VagM1	EIGC9_071_S21_L001_R2_001.fastq.gz
EIGC9_072_S77_L001_R1_001.fastq.gz	EIGC9.072	G0027-1-OraM1	AAMP49	AAMP49-1-OraM1	EIGC9_072_S77_L001_R1_001.fastq.gz
EIGC9_072_S77_L001_R2_001.fastq.gz	EIGC9.072	G0027-1-OraM1	AAMP49	AAMP49-1-OraM1	EIGC9_072_S77_L001_R2_001.fastq.gz
EIGC9_073_S36_L001_R1_001.fastq.gz	EIGC9.073	G0027-1-RecM1	AAMP49	AAMP49-1-RecM1	EIGC9_073_S36_L001_R1_001.fastq.gz
EIGC9_073_S36_L001_R2_001.fastq.gz	EIGC9.073	G0027-1-RecM1	AAMP49	AAMP49-1-RecM1	EIGC9_073_S36_L001_R2_001.fastq.gz
EIGC9_074_S45_L001_R1_001.fastq.gz	EIGC9.074	G0027-2-VagM1	AAMP49	AAMP49-2-VagM1	EIGC9_074_S45_L001_R1_001.fastq.gz
EIGC9_074_S45_L001_R2_001.fastq.gz	EIGC9.074	G0027-2-VagM1	AAMP49	AAMP49-2-VagM1	EIGC9_074_S45_L001_R2_001.fastq.gz
EIGC9_075_S80_L001_R1_001.fastq.gz	EIGC9.075	G0027-2-OraM1	AAMP49	AAMP49-2-OraM1	EIGC9_075_S80_L001_R1_001.fastq.gz
EIGC9_075_S80_L001_R2_001.fastq.gz	EIGC9.075	G0027-2-OraM1	AAMP49	AAMP49-2-OraM1	EIGC9_075_S80_L001_R2_001.fastq.gz
EIGC9_076_S65_L001_R1_001.fastq.gz	EIGC9.076	G0027-2-RecM1	AAMP49	AAMP49-2-RecM1	EIGC9_076_S65_L001_R1_001.fastq.gz
EIGC9_076_S65_L001_R2_001.fastq.gz	EIGC9.076	G0027-2-RecM1	AAMP49	AAMP49-2-RecM1	EIGC9_076_S65_L001_R2_001.fastq.gz
EIGC9_077_S5_L001_R1_001.fastq.gz	EIGC9.077	G0028-1-VagM1	AAMP50	AAMP50-1-VagM1	EIGC9_077_S5_L001_R1_001.fastq.gz
EIGC9_077_S5_L001_R2_001.fastq.gz	EIGC9.077	G0028-1-VagM1	AAMP50	AAMP50-1-VagM1	EIGC9_077_S5_L001_R2_001.fastq.gz
EIGC9_078_S83_L001_R1_001.fastq.gz	EIGC9.078	G0028-1-OraM1	AAMP50	AAMP50-1-OraM1	EIGC9_078_S83_L001_R1_001.fastq.gz
EIGC9_078_S83_L001_R2_001.fastq.gz	EIGC9.078	G0028-1-OraM1	AAMP50	AAMP50-1-OraM1	EIGC9_078_S83_L001_R2_001.fastq.gz
EIGC9_080_S29_L001_R1_001.fastq.gz	EIGC9.080	G0028-2-VagM1	AAMP50	AAMP50-2-VagM1	EIGC9_080_S29_L001_R1_001.fastq.gz
EIGC9_080_S29_L001_R2_001.fastq.gz	EIGC9.080	G0028-2-VagM1	AAMP50	AAMP50-2-VagM1	EIGC9_080_S29_L001_R2_001.fastq.gz
EIGC9_081_S89_L001_R1_001.fastq.gz	EIGC9.081	G0028-2-OraM1	AAMP50	AAMP50-2-OraM1	EIGC9_081_S89_L001_R1_001.fastq.gz
EIGC9_081_S89_L001_R2_001.fastq.gz	EIGC9.081	G0028-2-OraM1	AAMP50	AAMP50-2-OraM1	EIGC9_081_S89_L001_R2_001.fastq.gz
EIGC9_083_S56_L001_R1_001.fastq.gz	EIGC9.083	G0033-1-VagM1	AAMP53	AAMP53-1-VagM1	EIGC9_083_S56_L001_R1_001.fastq.gz
EIGC9_083_S56_L001_R2_001.fastq.gz	EIGC9.083	G0033-1-VagM1	AAMP53	AAMP53-1-VagM1	EIGC9_083_S56_L001_R2_001.fastq.gz
EIGC9_085_S95_L001_R1_001.fastq.gz	EIGC9.085	G0033-1-RecM1	AAMP53	AAMP53-1-RecM1	EIGC9_085_S95_L001_R1_001.fastq.gz
EIGC9_085_S95_L001_R2_001.fastq.gz	EIGC9.085	G0033-1-RecM1	AAMP53	AAMP53-1-RecM1	EIGC9_085_S95_L001_R2_001.fastq.gz
EIGC9_086_S13_L001_R1_001.fastq.gz	EIGC9.086	G0033-2-VagM1	AAMP53	AAMP53-2-VagM1	EIGC9_086_S13_L001_R1_001.fastq.gz
EIGC9_086_S13_L001_R2_001.fastq.gz	EIGC9.086	G0033-2-VagM1	AAMP53	AAMP53-2-VagM1	EIGC9_086_S13_L001_R2_001.fastq.gz
EIGC9_088_S78_L001_R1_001.fastq.gz	EIGC9.088	G0033-2-RecM1	AAMP53	AAMP53-2-RecM1	EIGC9_088_S78_L001_R1_001.fastq.gz
EIGC9_088_S78_L001_R2_001.fastq.gz	EIGC9.088	G0033-2-RecM1	AAMP53	AAMP53-2-RecM1	EIGC9_088_S78_L001_R2_001.fastq.gz
EIGC9_090_S46_L001_R1_001.fastq.gz	EIGC9.090	G0029-1-OraM1	AAMP51	AAMP51-1-OraM1	EIGC9_090_S46_L001_R1_001.fastq.gz
EIGC9_090_S46_L001_R2_001.fastq.gz	EIGC9.090	G0029-1-OraM1	AAMP51	AAMP51-1-OraM1	EIGC9_090_S46_L001_R2_001.fastq.gz
EIGC9_093_S6_L001_R1_001.fastq.gz	EIGC9.093	G0029-2-OraM1	AAMP51	AAMP51-2-OraM1	EIGC9_093_S6_L001_R1_001.fastq.gz
EIGC9_093_S6_L001_R2_001.fastq.gz	EIGC9.093	G0029-2-OraM1	AAMP51	AAMP51-2-OraM1	EIGC9_093_S6_L001_R2_001.fastq.gz
EIGC9_098_S47_L001_R1_001.fastq.gz	EIGC9.098	G0039-1-VagM1	AAMP57	AAMP57-1-VagM1	EIGC9_098_S47_L001_R1_001.fastq.gz
EIGC9_098_S47_L001_R2_001.fastq.gz	EIGC9.098	G0039-1-VagM1	AAMP57	AAMP57-1-VagM1	EIGC9_098_S47_L001_R2_001.fastq.gz
EIGC9_099_S58_L001_R1_001.fastq.gz	EIGC9.099	G0039-1-OraM1	AAMP57	AAMP57-1-OraM1	EIGC9_099_S58_L001_R1_001.fastq.gz
EIGC9_099_S58_L001_R2_001.fastq.gz	EIGC9.099	G0039-1-OraM1	AAMP57	AAMP57-1-OraM1	EIGC9_099_S58_L001_R2_001.fastq.gz
EIGC9_100_S68_L001_R1_001.fastq.gz	EIGC9.100	G0039-1-RecM1	AAMP57	AAMP57-1-RecM1	EIGC9_100_S68_L001_R1_001.fastq.gz
EIGC9_100_S68_L001_R2_001.fastq.gz	EIGC9.100	G0039-1-RecM1	AAMP57	AAMP57-1-RecM1	EIGC9_100_S68_L001_R2_001.fastq.gz
EIGC9_101_S7_L001_R1_001.fastq.gz	EIGC9.101	G0039-2-VagM1	AAMP57	AAMP57-2-VagM1	EIGC9_101_S7_L001_R1_001.fastq.gz
EIGC9_101_S7_L001_R2_001.fastq.gz	EIGC9.101	G0039-2-VagM1	AAMP57	AAMP57-2-VagM1	EIGC9_101_S7_L001_R2_001.fastq.gz
EIGC9_102_S14_L001_R1_001.fastq.gz	EIGC9.102	G0039-2-OraM1	AAMP57	AAMP57-2-OraM1	EIGC9_102_S14_L001_R1_001.fastq.gz
EIGC9_102_S14_L001_R2_001.fastq.gz	EIGC9.102	G0039-2-OraM1	AAMP57	AAMP57-2-OraM1	EIGC9_102_S14_L001_R2_001.fastq.gz
EIGC9_104_S90_L001_R1_001.fastq.gz	EIGC9.104	G0039-2-RecM1	AAMP57	AAMP57-2-RecM1	EIGC9_104_S90_L001_R1_001.fastq.gz
EIGC9_104_S90_L001_R2_001.fastq.gz	EIGC9.104	G0039-2-RecM1	AAMP57	AAMP57-2-RecM1	EIGC9_104_S90_L001_R2_001.fastq.gz
EIGC9_105_S38_L001_R1_001.fastq.gz	EIGC9.105	G0042-1-VagM1	AAMP59	AAMP59-1-VagM1	EIGC9_105_S38_L001_R1_001.fastq.gz
EIGC9_105_S38_L001_R2_001.fastq.gz	EIGC9.105	G0042-1-VagM1	AAMP59	AAMP59-1-VagM1	EIGC9_105_S38_L001_R2_001.fastq.gz
EIGC9_106_S48_L001_R1_001.fastq.gz	EIGC9.106	G0042-1-OraM1	AAMP59	AAMP59-1-OraM1	EIGC9_106_S48_L001_R1_001.fastq.gz
EIGC9_106_S48_L001_R2_001.fastq.gz	EIGC9.106	G0042-1-OraM1	AAMP59	AAMP59-1-OraM1	EIGC9_106_S48_L001_R2_001.fastq.gz
EIGC9_107_S59_L001_R1_001.fastq.gz	EIGC9.107	G0042-1-RecM1	AAMP59	AAMP59-1-RecM1	EIGC9_107_S59_L001_R1_001.fastq.gz
EIGC9_107_S59_L001_R2_001.fastq.gz	EIGC9.107	G0042-1-RecM1	AAMP59	AAMP59-1-RecM1	EIGC9_107_S59_L001_R2_001.fastq.gz
EIGC9_108_S69_L001_R1_001.fastq.gz	EIGC9.108	G0042-2-VagM1	AAMP59	AAMP59-2-VagM1	EIGC9_108_S69_L001_R1_001.fastq.gz
EIGC9_108_S69_L001_R2_001.fastq.gz	EIGC9.108	G0042-2-VagM1	AAMP59	AAMP59-2-VagM1	EIGC9_108_S69_L001_R2_001.fastq.gz
EIGC9_109_S8_L001_R1_001.fastq.gz	EIGC9.109	G0042-2-OraM1	AAMP59	AAMP59-2-OraM1	EIGC9_109_S8_L001_R1_001.fastq.gz
EIGC9_109_S8_L001_R2_001.fastq.gz	EIGC9.109	G0042-2-OraM1	AAMP59	AAMP59-2-OraM1	EIGC9_109_S8_L001_R2_001.fastq.gz
EIGC9_110_S15_L001_R1_001.fastq.gz	EIGC9.110	G0042-2-RecM1	AAMP59	AAMP59-2-RecM1	EIGC9_110_S15_L001_R1_001.fastq.gz
EIGC9_110_S15_L001_R2_001.fastq.gz	EIGC9.110	G0042-2-RecM1	AAMP59	AAMP59-2-RecM1	EIGC9_110_S15_L001_R2_001.fastq.gz
EIGC9_111_S23_L001_R1_001.fastq.gz	EIGC9.111	G0044-1-VagM1	AAMP60	AAMP60-1-VagM1	EIGC9_111_S23_L001_R1_001.fastq.gz
EIGC9_111_S23_L001_R2_001.fastq.gz	EIGC9.111	G0044-1-VagM1	AAMP60	AAMP60-1-VagM1	EIGC9_111_S23_L001_R2_001.fastq.gz
EIGC9_112_S31_L001_R1_001.fastq.gz	EIGC9.112	G0044-1-OraM1	AAMP60	AAMP60-1-OraM1	EIGC9_112_S31_L001_R1_001.fastq.gz
EIGC9_112_S31_L001_R2_001.fastq.gz	EIGC9.112	G0044-1-OraM1	AAMP60	AAMP60-1-OraM1	EIGC9_112_S31_L001_R2_001.fastq.gz
EIGC9_114_S49_L001_R1_001.fastq.gz	EIGC9.114	G0044-2-VagM1	AAMP60	AAMP60-2-VagM1	EIGC9_114_S49_L001_R1_001.fastq.gz
EIGC9_114_S49_L001_R2_001.fastq.gz	EIGC9.114	G0044-2-VagM1	AAMP60	AAMP60-2-VagM1	EIGC9_114_S49_L001_R2_001.fastq.gz
EIGC9_115_S60_L001_R1_001.fastq.gz	EIGC9.115	G0044-2-OraM1	AAMP60	AAMP60-2-OraM1	EIGC9_115_S60_L001_R1_001.fastq.gz
EIGC9_115_S60_L001_R2_001.fastq.gz	EIGC9.115	G0044-2-OraM1	AAMP60	AAMP60-2-OraM1	EIGC9_115_S60_L001_R2_001.fastq.gz
EIGC9_117_S9_L001_R1_001.fastq.gz	EIGC9.117	G0047-1-VagM1	AAMP62	AAMP62-1-VagM1	EIGC9_117_S9_L001_R1_001.fastq.gz
EIGC9_117_S9_L001_R2_001.fastq.gz	EIGC9.117	G0047-1-VagM1	AAMP62	AAMP62-1-VagM1	EIGC9_117_S9_L001_R2_001.fastq.gz
EIGC9_118_S16_L001_R1_001.fastq.gz	EIGC9.118	G0047-1-OraM1	AAMP62	AAMP62-1-OraM1	EIGC9_118_S16_L001_R1_001.fastq.gz
EIGC9_118_S16_L001_R2_001.fastq.gz	EIGC9.118	G0047-1-OraM1	AAMP62	AAMP62-1-OraM1	EIGC9_118_S16_L001_R2_001.fastq.gz
EIGC9_119_S24_L001_R1_001.fastq.gz	EIGC9.119	G0047-1-RecM1	AAMP62	AAMP62-1-RecM1	EIGC9_119_S24_L001_R1_001.fastq.gz
EIGC9_119_S24_L001_R2_001.fastq.gz	EIGC9.119	G0047-1-RecM1	AAMP62	AAMP62-1-RecM1	EIGC9_119_S24_L001_R2_001.fastq.gz
EIGC9_120_S32_L001_R1_001.fastq.gz	EIGC9.120	G0047-2-VagM1	AAMP62	AAMP62-2-VagM1	EIGC9_120_S32_L001_R1_001.fastq.gz
EIGC9_120_S32_L001_R2_001.fastq.gz	EIGC9.120	G0047-2-VagM1	AAMP62	AAMP62-2-VagM1	EIGC9_120_S32_L001_R2_001.fastq.gz
EIGC9_121_S40_L001_R1_001.fastq.gz	EIGC9.121	G0047-2-OraM1	AAMP62	AAMP62-2-OraM1	EIGC9_121_S40_L001_R1_001.fastq.gz
EIGC9_121_S40_L001_R2_001.fastq.gz	EIGC9.121	G0047-2-OraM1	AAMP62	AAMP62-2-OraM1	EIGC9_121_S40_L001_R2_001.fastq.gz
EIGC9_122_S50_L001_R1_001.fastq.gz	EIGC9.122	G0047-2-RecM1	AAMP62	AAMP62-2-RecM1	EIGC9_122_S50_L001_R1_001.fastq.gz
EIGC9_122_S50_L001_R2_001.fastq.gz	EIGC9.122	G0047-2-RecM1	AAMP62	AAMP62-2-RecM1	EIGC9_122_S50_L001_R2_001.fastq.gz
EIGC9_123_S61_L001_R1_001.fastq.gz	EIGC9.123	G0053-1-VagM1	AAMP66	AAMP66-1-VagM1	EIGC9_123_S61_L001_R1_001.fastq.gz
EIGC9_123_S61_L001_R2_001.fastq.gz	EIGC9.123	G0053-1-VagM1	AAMP66	AAMP66-1-VagM1	EIGC9_123_S61_L001_R2_001.fastq.gz
EIGC9_124_S70_L001_R1_001.fastq.gz	EIGC9.124	G0053-1-OraM1	AAMP66	AAMP66-1-OraM1	EIGC9_124_S70_L001_R1_001.fastq.gz
EIGC9_124_S70_L001_R2_001.fastq.gz	EIGC9.124	G0053-1-OraM1	AAMP66	AAMP66-1-OraM1	EIGC9_124_S70_L001_R2_001.fastq.gz
EIGC9_126_S17_L001_R1_001.fastq.gz	EIGC9.126	G0053-2-VagM1	AAMP66	AAMP66-2-VagM1	EIGC9_126_S17_L001_R1_001.fastq.gz
EIGC9_126_S17_L001_R2_001.fastq.gz	EIGC9.126	G0053-2-VagM1	AAMP66	AAMP66-2-VagM1	EIGC9_126_S17_L001_R2_001.fastq.gz
EIGC9_127_S25_L001_R1_001.fastq.gz	EIGC9.127	G0053-2-OraM1	AAMP66	AAMP66-2-OraM1	EIGC9_127_S25_L001_R1_001.fastq.gz
EIGC9_127_S25_L001_R2_001.fastq.gz	EIGC9.127	G0053-2-OraM1	AAMP66	AAMP66-2-OraM1	EIGC9_127_S25_L001_R2_001.fastq.gz
EIGC9_130_S51_L001_R1_001.fastq.gz	EIGC9.130	G0054-1-OraM1	AAMP67	AAMP67-1-OraM1	EIGC9_130_S51_L001_R1_001.fastq.gz
EIGC9_130_S51_L001_R2_001.fastq.gz	EIGC9.130	G0054-1-OraM1	AAMP67	AAMP67-1-OraM1	EIGC9_130_S51_L001_R2_001.fastq.gz
EIGC9_131_S62_L001_R1_001.fastq.gz	EIGC9.131	G0054-2-OraM1	AAMP67	AAMP67-2-OraM1	EIGC9_131_S62_L001_R1_001.fastq.gz
EIGC9_131_S62_L001_R2_001.fastq.gz	EIGC9.131	G0054-2-OraM1	AAMP67	AAMP67-2-OraM1	EIGC9_131_S62_L001_R2_001.fastq.gz
MZW20791-0209-2_VagM1_S41_L001_R1_001.fastq.gz	MZW20791.0209.2.VagM1.S41	G0105-1-VagM1	AAMP105	AAMP105-1-VagM1	MZW20791-0209-2_VagM1_S41_L001_R1_001.fastq.gz
MZW20791-0209-2_VagM1_S41_L001_R2_001.fastq.gz	MZW20791.0209.2.VagM1.S41	G0105-1-VagM1	AAMP105	AAMP105-1-VagM1	MZW20791-0209-2_VagM1_S41_L001_R2_001.fastq.gz
MZW20791-0209-61-OraM1_S42_L001_R1_001.fastq.gz	MZW20791.0209.61.OraM1.S42	G0105-1-OraM1	AAMP105	AAMP105-1-OraM1	MZW20791-0209-6_OraM1_S42_L001_R1_001.fastq.gz
MZW20791-0209-61-OraM1_S42_L001_R2_001.fastq.gz	MZW20791.0209.61.OraM1.S42	G0105-1-OraM1	AAMP105	AAMP105-1-OraM1	MZW20791-0209-6_OraM1_S42_L001_R2_001.fastq.gz
MZW20791-0210-22-VagM1_S44_L001_R1_001.fastq.gz	MZW20791.0210.22.VagM1.S44	G0105-2-VagM1	AAMP105	AAMP105-2-VagM1	MZW20791-0210-2_VagM1_S44_L001_R1_001.fastq.gz
MZW20791-0210-22-VagM1_S44_L001_R2_001.fastq.gz	MZW20791.0210.22.VagM1.S44	G0105-2-VagM1	AAMP105	AAMP105-2-VagM1	MZW20791-0210-2_VagM1_S44_L001_R2_001.fastq.gz
MZW20791-0210-62-OraM1_S45_L001_R1_001.fastq.gz	MZW20791.0210.62.OraM1.S45	G0105-2-OraM1	AAMP105	AAMP105-2-OraM1	MZW20791-0210-6_OraM1_S45_L001_R1_001.fastq.gz
MZW20791-0210-62-OraM1_S45_L001_R2_001.fastq.gz	MZW20791.0210.62.OraM1.S45	G0105-2-OraM1	AAMP105	AAMP105-2-OraM1	MZW20791-0210-6_OraM1_S45_L001_R2_001.fastq.gz
MZW20791-0219-2_VagM1_S46_L001_R1_001.fastq.gz	MZW20791.0219.21.VagM1.S46	G0110-1-VagM1	AAMP106	AAMP106-1-VagM1	MZW20791-0219-2_VagM1_S46_L001_R1_001.fastq.gz
MZW20791-0219-2_VagM1_S46_L001_R2_001.fastq.gz	MZW20791.0219.21.VagM1.S46	G0110-1-VagM1	AAMP106	AAMP106-1-VagM1	MZW20791-0219-2_VagM1_S46_L001_R2_001.fastq.gz
MZW20791-0219-61-OraM1_S47_L001_R1_001.fastq.gz	MZW20791.0219.61.OraM1.S47	G0110-1-OraM1	AAMP106	AAMP106-1-OraM1	MZW20791-0219-6_OraM1_S47_L001_R1_001.fastq.gz
MZW20791-0219-61-OraM1_S47_L001_R2_001.fastq.gz	MZW20791.0219.61.OraM1.S47	G0110-1-OraM1	AAMP106	AAMP106-1-OraM1	MZW20791-0219-6_OraM1_S47_L001_R2_001.fastq.gz
MZW20791-0220-22-VagM1_S49_L001_R1_001.fastq.gz	MZW20791.0220.22.VagM1.S49	G0110-2-VagM1	AAMP106	AAMP106-2-VagM1	MZW20791-0220-2_VagM1_S49_L001_R1_001.fastq.gz
MZW20791-0220-22-VagM1_S49_L001_R2_001.fastq.gz	MZW20791.0220.22.VagM1.S49	G0110-2-VagM1	AAMP106	AAMP106-2-VagM1	MZW20791-0220-2_VagM1_S49_L001_R2_001.fastq.gz
MZW20791-0220-62-OraM1_S50_L001_R1_001.fastq.gz	MZW20791.0220.62.OraM1.S50	G0110-2-OraM1	AAMP106	AAMP106-2-OraM1	MZW20791-0220-6_OraM1_S50_L001_R1_001.fastq.gz
MZW20791-0220-62-OraM1_S50_L001_R2_001.fastq.gz	MZW20791.0220.62.OraM1.S50	G0110-2-OraM1	AAMP106	AAMP106-2-OraM1	MZW20791-0220-6_OraM1_S50_L001_R2_001.fastq.gz
MZW20791-0221-2_VagM1_S61_L001_R1_001.fastq.gz	MZW20791.0221.21.VagM1.S61	G0111-1-VagM1	AAMP107	AAMP107-1-VagM1	MZW20791-0221-2_VagM1_S61_L001_R1_001.fastq.gz
MZW20791-0221-2_VagM1_S61_L001_R2_001.fastq.gz	MZW20791.0221.21.VagM1.S61	G0111-1-VagM1	AAMP107	AAMP107-1-VagM1	MZW20791-0221-2_VagM1_S61_L001_R2_001.fastq.gz
MZW20791-0221-81-RecM1_S63_L001_R1_001.fastq.gz	MZW20791.0221.81.RecM1.S63	G0111-1-RecM1	AAMP107	AAMP107-1-RecM1	MZW20791-0221-8_RecM1_S63_L001_R1_001.fastq.gz
MZW20791-0221-81-RecM1_S63_L001_R2_001.fastq.gz	MZW20791.0221.81.RecM1.S63	G0111-1-RecM1	AAMP107	AAMP107-1-RecM1	MZW20791-0221-8_RecM1_S63_L001_R2_001.fastq.gz
MZW20791-0222-22-VagM1_S64_L001_R1_001.fastq.gz	MZW20791.0222.22.VagM1.S64	G0111-2-VagM1	AAMP107	AAMP107-2-VagM1	MZW20791-0222-2_VagM1_S64_L001_R1_001.fastq.gz
MZW20791-0222-22-VagM1_S64_L001_R2_001.fastq.gz	MZW20791.0222.22.VagM1.S64	G0111-2-VagM1	AAMP107	AAMP107-2-VagM1	MZW20791-0222-2_VagM1_S64_L001_R2_001.fastq.gz
MZW20791-0222-82-RecM1_S65_L001_R1_001.fastq.gz	MZW20791.0222.82.RecM1.S65	G0111-2-RecM1	AAMP107	AAMP107-2-RecM1	MZW20791-0222-8_RecM1_S65_L001_R1_001.fastq.gz
MZW20791-0222-82-RecM1_S65_L001_R2_001.fastq.gz	MZW20791.0222.82.RecM1.S65	G0111-2-RecM1	AAMP107	AAMP107-2-RecM1	MZW20791-0222-8_RecM1_S65_L001_R2_001.fastq.gz
MZW20791-0245-2_VagM1_S66_L001_R1_001.fastq.gz	MZW20791.0245.21.VagM1.S66	G0123-1-VagM1	AAMP108	AAMP108-1-VagM1	MZW20791-0245-2_VagM1_S66_L001_R1_001.fastq.gz
MZW20791-0245-2_VagM1_S66_L001_R2_001.fastq.gz	MZW20791.0245.21.VagM1.S66	G0123-1-VagM1	AAMP108	AAMP108-1-VagM1	MZW20791-0245-2_VagM1_S66_L001_R2_001.fastq.gz
MZW20791-0245-61-OraM1_S67_L001_R1_001.fastq.gz	MZW20791.0245.61.OraM1.S67	G0123-1-OraM1	AAMP108	AAMP108-1-OraM1	MZW20791-0245-6_OraM1_S67_L001_R1_001.fastq.gz
MZW20791-0245-61-OraM1_S67_L001_R2_001.fastq.gz	MZW20791.0245.61.OraM1.S67	G0123-1-OraM1	AAMP108	AAMP108-1-OraM1	MZW20791-0245-6_OraM1_S67_L001_R2_001.fastq.gz
MZW20791-0246-22-VagM1_S68_L001_R1_001.fastq.gz	MZW20791.0246.22.VagM1.S68	G0123-2-VagM1	AAMP108	AAMP108-2-VagM1	MZW20791-0246-2_VagM1_S68_L001_R1_001.fastq.gz
MZW20791-0246-22-VagM1_S68_L001_R2_001.fastq.gz	MZW20791.0246.22.VagM1.S68	G0123-2-VagM1	AAMP108	AAMP108-2-VagM1	MZW20791-0246-2_VagM1_S68_L001_R2_001.fastq.gz
MZW20791-0246-62-OraM1_S69_L001_R1_001.fastq.gz	MZW20791.0246.62.OraM1.S69	G0123-2-OraM1	AAMP108	AAMP108-2-OraM1	MZW20791-0246-6_OraM1_S69_L001_R1_001.fastq.gz
MZW20791-0246-62-OraM1_S69_L001_R2_001.fastq.gz	MZW20791.0246.62.OraM1.S69	G0123-2-OraM1	AAMP108	AAMP108-2-OraM1	MZW20791-0246-6_OraM1_S69_L001_R2_001.fastq.gz
MZW20791-0247-2_VagM1_S70_L001_R1_001.fastq.gz	MZW20791.0247.21.VagM1.S70	G0124-1-VagM1	AAMP109	AAMP109-1-VagM1	MZW20791-0247-2_VagM1_S70_L001_R1_001.fastq.gz
MZW20791-0247-2_VagM1_S70_L001_R2_001.fastq.gz	MZW20791.0247.21.VagM1.S70	G0124-1-VagM1	AAMP109	AAMP109-1-VagM1	MZW20791-0247-2_VagM1_S70_L001_R2_001.fastq.gz
MZW20791-0248-22-VagM1_S73_L001_R1_001.fastq.gz	MZW20791.0248.22.VagM1.S73	G0124-2-VagM1	AAMP109	AAMP109-2-VagM1	MZW20791-0248-2_VagM1_S73_L001_R1_001.fastq.gz
MZW20791-0248-22-VagM1_S73_L001_R2_001.fastq.gz	MZW20791.0248.22.VagM1.S73	G0124-2-VagM1	AAMP109	AAMP109-2-VagM1	MZW20791-0248-2_VagM1_S73_L001_R2_001.fastq.gz
MZW20791-0395-2_VagM1_S12_L001_R1_001.fastq.gz	MZW20791.0395.21.VagM1	G0198-1-VagM1	AAMP110	AAMP110-1-VagM1	MZW20791-0395-2_VagM1_S12_L001_R1_001.fastq.gz
MZW20791-0395-2_VagM1_S12_L001_R2_001.fastq.gz	MZW20791.0395.21.VagM1	G0198-1-VagM1	AAMP110	AAMP110-1-VagM1	MZW20791-0395-2_VagM1_S12_L001_R2_001.fastq.gz
MZW20791-0396-22-VagM1_S46_L001_R1_001.fastq.gz	MZW20791.0396.22.VagM1	G0198-2-VagM1	AAMP110	AAMP110-2-VagM1	MZW20791-0396-2_VagM1_S46_L001_R1_001.fastq.gz
MZW20791-0396-22-VagM1_S46_L001_R2_001.fastq.gz	MZW20791.0396.22.VagM1	G0198-2-VagM1	AAMP110	AAMP110-2-VagM1	MZW20791-0396-2_VagM1_S46_L001_R2_001.fastq.gz
MZW20791-0397-2_VagM1_S78_L001_R1_001.fastq.gz	MZW20791.0397.21.VagM1	G0199-1-VagM1	AAMP111	AAMP111-1-VagM1	MZW20791-0397-2_VagM1_S78_L001_R1_001.fastq.gz
MZW20791-0397-2_VagM1_S78_L001_R2_001.fastq.gz	MZW20791.0397.21.VagM1	G0199-1-VagM1	AAMP111	AAMP111-1-VagM1	MZW20791-0397-2_VagM1_S78_L001_R2_001.fastq.gz
MZW20791-0398-22-VagM1_S24_L001_R1_001.fastq.gz	MZW20791.0398.22.VagM1	G0199-2-VagM1	AAMP111	AAMP111-2-VagM1	MZW20791-0398-2_VagM1_S24_L001_R1_001.fastq.gz
MZW20791-0398-22-VagM1_S24_L001_R2_001.fastq.gz	MZW20791.0398.22.VagM1	G0199-2-VagM1	AAMP111	AAMP111-2-VagM1	MZW20791-0398-2_VagM1_S24_L001_R2_001.fastq.gz
MZW20791-0399-2_VagM1_S58_L001_R1_001.fastq.gz	MZW20791.0399.21.VagM1	G0200-1-VagM1	AAMP112	AAMP112-1-VagM1	MZW20791-0399-2_VagM1_S58_L001_R1_001.fastq.gz
MZW20791-0399-2_VagM1_S58_L001_R2_001.fastq.gz	MZW20791.0399.21.VagM1	G0200-1-VagM1	AAMP112	AAMP112-1-VagM1	MZW20791-0399-2_VagM1_S58_L001_R2_001.fastq.gz
MZW20791-0399-61-OraM1_S47_L001_R1_001.fastq.gz	MZW20791.0399.61.OraM1	G0200-1-OraM1	AAMP112	AAMP112-1-OraM1	MZW20791-0399-6_OraM1_S47_L001_R1_001.fastq.gz
MZW20791-0399-61-OraM1_S47_L001_R2_001.fastq.gz	MZW20791.0399.61.OraM1	G0200-1-OraM1	AAMP112	AAMP112-1-OraM1	MZW20791-0399-6_OraM1_S47_L001_R2_001.fastq.gz
MZW20791-0400-22-VagM1_S3_L001_R1_001.fastq.gz	MZW20791.0400.22.VagM1	G0200-2-VagM1	AAMP112	AAMP112-2-VagM1	MZW20791-0400-2_VagM1_S3_L001_R1_001.fastq.gz
MZW20791-0400-22-VagM1_S3_L001_R2_001.fastq.gz	MZW20791.0400.22.VagM1	G0200-2-VagM1	AAMP112	AAMP112-2-VagM1	MZW20791-0400-2_VagM1_S3_L001_R2_001.fastq.gz
MZW20791-0400-62-OraM1_S79_L001_R1_001.fastq.gz	MZW20791.0400.62.OraM1	G0200-2-OraM1	AAMP112	AAMP112-2-OraM1	MZW20791-0400-6_OraM1_S79_L001_R1_001.fastq.gz
MZW20791-0400-62-OraM1_S79_L001_R2_001.fastq.gz	MZW20791.0400.62.OraM1	G0200-2-OraM1	AAMP112	AAMP112-2-OraM1	MZW20791-0400-6_OraM1_S79_L001_R2_001.fastq.gz
MZW20791-0401-2_VagM1_S36_L001_R1_001.fastq.gz	MZW20791.0401.21.VagM1	G0201-1-VagM1	AAMP113	AAMP113-1-VagM1	MZW20791-0401-2_VagM1_S36_L001_R1_001.fastq.gz
MZW20791-0401-2_VagM1_S36_L001_R2_001.fastq.gz	MZW20791.0401.21.VagM1	G0201-1-VagM1	AAMP113	AAMP113-1-VagM1	MZW20791-0401-2_VagM1_S36_L001_R2_001.fastq.gz
MZW20791-10007-1_VagM1_S33_L001_R1_001.fastq.gz	MZW20791.10007.11.VagM1	G0209-1-VagM1	AAMP118	AAMP118-1-VagM1	MZW20791-10007-1_VagM1_S33_L001_R1_001.fastq.gz
MZW20791-10007-1_VagM1_S33_L001_R2_001.fastq.gz	MZW20791.10007.11.VagM1	G0209-1-VagM1	AAMP118	AAMP118-1-VagM1	MZW20791-10007-1_VagM1_S33_L001_R2_001.fastq.gz
MZW20791-10013-11-RecM1_S57_L001_R1_001.fastq.gz	MZW20791.10013.11.RecM1	G0209-1-RecM1	AAMP118	AAMP118-1-RecM1	MZW20791-10013-1_RecM1_S57_L001_R1_001.fastq.gz
MZW20791-10013-11-RecM1_S57_L001_R2_001.fastq.gz	MZW20791.10013.11.RecM1	G0209-1-RecM1	AAMP118	AAMP118-1-RecM1	MZW20791-10013-1_RecM1_S57_L001_R2_001.fastq.gz
MZW20791-10070-12-VagM1_S67_L001_R1_001.fastq.gz	MZW20791.10070.12.VagM1	G0209-2-VagM1	AAMP118	AAMP118-2-VagM1	MZW20791-10070-1_VagM1_S67_L001_R1_001.fastq.gz
MZW20791-10070-12-VagM1_S67_L001_R2_001.fastq.gz	MZW20791.10070.12.VagM1	G0209-2-VagM1	AAMP118	AAMP118-2-VagM1	MZW20791-10070-1_VagM1_S67_L001_R2_001.fastq.gz
MZW20791-10076-12-RecM1_S88_L001_R1_001.fastq.gz	MZW20791.10076.12.RecM1	G0209-2-RecM1	AAMP118	AAMP118-2-RecM1	MZW20791-10076-1_RecM1_S88_L001_R1_001.fastq.gz
MZW20791-10076-12-RecM1_S88_L001_R2_001.fastq.gz	MZW20791.10076.12.RecM1	G0209-2-RecM1	AAMP118	AAMP118-2-RecM1	MZW20791-10076-1_RecM1_S88_L001_R2_001.fastq.gz
MZW20791-10102-1_VagM1_S42_L001_R1_001.fastq.gz	MZW20791.10102.11.VagM1	G0210-1-VagM1	AAMP119	AAMP119-1-VagM1	MZW20791-10102-1_VagM1_S42_L001_R1_001.fastq.gz
MZW20791-10102-1_VagM1_S42_L001_R2_001.fastq.gz	MZW20791.10102.11.VagM1	G0210-1-VagM1	AAMP119	AAMP119-1-VagM1	MZW20791-10102-1_VagM1_S42_L001_R2_001.fastq.gz
MZW20791-10165-12-VagM1_S8_L001_R1_001.fastq.gz	MZW20791.10165.12.VagM1	G0210-2-VagM1	AAMP119	AAMP119-2-VagM1	MZW20791-10165-1_VagM1_S8_L001_R1_001.fastq.gz
MZW20791-10165-12-VagM1_S8_L001_R2_001.fastq.gz	MZW20791.10165.12.VagM1	G0210-2-VagM1	AAMP119	AAMP119-2-VagM1	MZW20791-10165-1_VagM1_S8_L001_R2_001.fastq.gz
MZW20791-11432-1_VagM1_S63_L001_R1_001.fastq.gz	MZW20791.11432.11.VagM1	G0224-1-VagM1	AAMP120	AAMP120-1-VagM1	MZW20791-11432-1_VagM1_S63_L001_R1_001.fastq.gz
MZW20791-11432-1_VagM1_S63_L001_R2_001.fastq.gz	MZW20791.11432.11.VagM1	G0224-1-VagM1	AAMP120	AAMP120-1-VagM1	MZW20791-11432-1_VagM1_S63_L001_R2_001.fastq.gz
MZW20791-11495-12-VagM1_S29_L001_R1_001.fastq.gz	MZW20791.11495.12.VagM1	G0224-2-VagM1	AAMP120	AAMP120-2-VagM1	MZW20791-11495-1_VagM1_S29_L001_R1_001.fastq.gz
MZW20791-11495-12-VagM1_S29_L001_R2_001.fastq.gz	MZW20791.11495.12.VagM1	G0224-2-VagM1	AAMP120	AAMP120-2-VagM1	MZW20791-11495-1_VagM1_S29_L001_R2_001.fastq.gz
MZW20791-11527-1_VagM1_S83_L001_R1_001.fastq.gz	MZW20791.11527.11.VagM1	G0225-1-VagM1	AAMP121	AAMP121-1-VagM1	MZW20791-11527-1_VagM1_S83_L001_R1_001.fastq.gz
MZW20791-11527-1_VagM1_S83_L001_R2_001.fastq.gz	MZW20791.11527.11.VagM1	G0225-1-VagM1	AAMP121	AAMP121-1-VagM1	MZW20791-11527-1_VagM1_S83_L001_R2_001.fastq.gz
MZW20791-11533-11-RecM1_S73_L001_R1_001.fastq.gz	MZW20791.11533.11.RecM1	G0225-1-RecM1	AAMP121	AAMP121-1-RecM1	MZW20791-11533-1_RecM1_S73_L001_R1_001.fastq.gz
MZW20791-11533-11-RecM1_S73_L001_R2_001.fastq.gz	MZW20791.11533.11.RecM1	G0225-1-RecM1	AAMP121	AAMP121-1-RecM1	MZW20791-11533-1_RecM1_S73_L001_R2_001.fastq.gz
MZW20791-11590-12-VagM1_S52_L001_R1_001.fastq.gz	MZW20791.11590.12.VagM1	G0225-2-VagM1	AAMP121	AAMP121-2-VagM1	MZW20791-11590-1_VagM1_S52_L001_R1_001.fastq.gz
MZW20791-11590-12-VagM1_S52_L001_R2_001.fastq.gz	MZW20791.11590.12.VagM1	G0225-2-VagM1	AAMP121	AAMP121-2-VagM1	MZW20791-11590-1_VagM1_S52_L001_R2_001.fastq.gz
MZW20791-11596-12-RecM1_S40_L001_R1_001.fastq.gz	MZW20791.11596.12.RecM1	G0225-2-RecM1	AAMP121	AAMP121-2-RecM1	MZW20791-11596-1_RecM1_S40_L001_R1_001.fastq.gz
MZW20791-11596-12-RecM1_S40_L001_R2_001.fastq.gz	MZW20791.11596.12.RecM1	G0225-2-RecM1	AAMP121	AAMP121-2-RecM1	MZW20791-11596-1_RecM1_S40_L001_R2_001.fastq.gz
MZW20791-12572-1_VagM1_S27_L001_R1_001.fastq.gz	MZW20791.12572.11.VagM1	G0236-1-VagM1	AAMP122	AAMP122-1-VagM1	MZW20791-12572-1_VagM1_S27_L001_R1_001.fastq.gz
MZW20791-12572-1_VagM1_S27_L001_R2_001.fastq.gz	MZW20791.12572.11.VagM1	G0236-1-VagM1	AAMP122	AAMP122-1-VagM1	MZW20791-12572-1_VagM1_S27_L001_R2_001.fastq.gz
MZW20791-12578-11-RecM1_S51_L001_R1_001.fastq.gz	MZW20791.12578.11.RecM1	G0236-1-RecM1	AAMP122	AAMP122-1-RecM1	MZW20791-12578-1_RecM1_S51_L001_R1_001.fastq.gz
MZW20791-12578-11-RecM1_S51_L001_R2_001.fastq.gz	MZW20791.12578.11.RecM1	G0236-1-RecM1	AAMP122	AAMP122-1-RecM1	MZW20791-12578-1_RecM1_S51_L001_R2_001.fastq.gz
MZW20791-12635-12-VagM1_S81_L001_R1_001.fastq.gz	MZW20791.12635.12.VagM1	G0236-2-VagM1	AAMP122	AAMP122-2-VagM1	MZW20791-12635-1_VagM1_S81_L001_R1_001.fastq.gz
MZW20791-12635-12-VagM1_S81_L001_R2_001.fastq.gz	MZW20791.12635.12.VagM1	G0236-2-VagM1	AAMP122	AAMP122-2-VagM1	MZW20791-12635-1_VagM1_S81_L001_R2_001.fastq.gz
MZW20791-12641-12-RecM1_S17_L001_R1_001.fastq.gz	MZW20791.12641.12.RecM1	G0236-2-RecM1	AAMP122	AAMP122-2-RecM1	MZW20791-12641-1_RecM1_S17_L001_R1_001.fastq.gz
MZW20791-12641-12-RecM1_S17_L001_R2_001.fastq.gz	MZW20791.12641.12.RecM1	G0236-2-RecM1	AAMP122	AAMP122-2-RecM1	MZW20791-12641-1_RecM1_S17_L001_R2_001.fastq.gz
MZW20791-1297-2_VagM1_S2_L001_R1_001.fastq.gz	MZW20791.1297.21.VagM1	E0649-1-VagM1	AAMP33	AAMP33-1-VagM1	MZW20791-1297-2_VagM1_S2_L001_R1_001.fastq.gz
MZW20791-1297-2_VagM1_S2_L001_R2_001.fastq.gz	MZW20791.1297.21.VagM1	E0649-1-VagM1	AAMP33	AAMP33-1-VagM1	MZW20791-1297-2_VagM1_S2_L001_R2_001.fastq.gz
MZW20791-1297-61-OraM1_S1_L001_R1_001.fastq.gz	MZW20791.1297.61.OraM1.S1	E0649-1-OraM1	AAMP33	AAMP33-1-OraM1	MZW20791-1297-6_OraM1_S1_L001_R1_001.fastq.gz
MZW20791-1297-61-OraM1_S1_L001_R2_001.fastq.gz	MZW20791.1297.61.OraM1.S1	E0649-1-OraM1	AAMP33	AAMP33-1-OraM1	MZW20791-1297-6_OraM1_S1_L001_R2_001.fastq.gz
MZW20791-1298-22-VagM1_S5_L001_R1_001.fastq.gz	MZW20791.1298.22.VagM1.S5	E0649-2-VagM1	AAMP33	AAMP33-2-VagM1	MZW20791-1298-2_VagM1_S5_L001_R1_001.fastq.gz
MZW20791-1298-22-VagM1_S5_L001_R2_001.fastq.gz	MZW20791.1298.22.VagM1.S5	E0649-2-VagM1	AAMP33	AAMP33-2-VagM1	MZW20791-1298-2_VagM1_S5_L001_R2_001.fastq.gz
MZW20791-1298-62-OraM1_S4_L001_R1_001.fastq.gz	MZW20791.1298.62.OraM1.S4	E0649-2-OraM1	AAMP33	AAMP33-2-OraM1	MZW20791-1298-6_OraM1_S4_L001_R1_001.fastq.gz
MZW20791-1298-62-OraM1_S4_L001_R2_001.fastq.gz	MZW20791.1298.62.OraM1.S4	E0649-2-OraM1	AAMP33	AAMP33-2-OraM1	MZW20791-1298-6_OraM1_S4_L001_R2_001.fastq.gz
MZW20791-1299-2_VagM1_S6_L001_R1_001.fastq.gz	MZW20791.1299.21.VagM1.S6	E0650-1-VagM1	AAMP34	AAMP34-1-VagM1	MZW20791-1299-2_VagM1_S6_L001_R1_001.fastq.gz
MZW20791-1299-2_VagM1_S6_L001_R2_001.fastq.gz	MZW20791.1299.21.VagM1.S6	E0650-1-VagM1	AAMP34	AAMP34-1-VagM1	MZW20791-1299-2_VagM1_S6_L001_R2_001.fastq.gz
MZW20791-1300-22-VagM1_S8_L001_R1_001.fastq.gz	MZW20791.1300.22.VagM1.S8	E0650-2-VagM1	AAMP34	AAMP34-2-VagM1	MZW20791-1300-2_VagM1_S8_L001_R1_001.fastq.gz
MZW20791-1300-22-VagM1_S8_L001_R2_001.fastq.gz	MZW20791.1300.22.VagM1.S8	E0650-2-VagM1	AAMP34	AAMP34-2-VagM1	MZW20791-1300-2_VagM1_S8_L001_R2_001.fastq.gz
MZW20791-1301-2_VagM1_S11_L001_R1_001.fastq.gz	MZW20791.1301.21.VagM1.S11	E0651-1-VagM1	AAMP35	AAMP35-1-VagM1	MZW20791-1301-2_VagM1_S11_L001_R1_001.fastq.gz
MZW20791-1301-2_VagM1_S11_L001_R2_001.fastq.gz	MZW20791.1301.21.VagM1.S11	E0651-1-VagM1	AAMP35	AAMP35-1-VagM1	MZW20791-1301-2_VagM1_S11_L001_R2_001.fastq.gz
MZW20791-1301-81-RecM1_S12_L001_R1_001.fastq.gz	MZW20791.1301.81.RecM1.S12	E0651-1-RecM1	AAMP35	AAMP35-1-RecM1	MZW20791-1301-8_RecM1_S12_L001_R1_001.fastq.gz
MZW20791-1301-81-RecM1_S12_L001_R2_001.fastq.gz	MZW20791.1301.81.RecM1.S12	E0651-1-RecM1	AAMP35	AAMP35-1-RecM1	MZW20791-1301-8_RecM1_S12_L001_R2_001.fastq.gz
MZW20791-1302-22-VagM1_S13_L001_R1_001.fastq.gz	MZW20791.1302.22.VagM1.S13	E0651-2-VagM1	AAMP35	AAMP35-2-VagM1	MZW20791-1302-2_VagM1_S13_L001_R1_001.fastq.gz
MZW20791-1302-22-VagM1_S13_L001_R2_001.fastq.gz	MZW20791.1302.22.VagM1.S13	E0651-2-VagM1	AAMP35	AAMP35-2-VagM1	MZW20791-1302-2_VagM1_S13_L001_R2_001.fastq.gz
MZW20791-1302-82-RecM1_S14_L001_R1_001.fastq.gz	MZW20791.1302.82.RecM1.S14	E0651-2-RecM1	AAMP35	AAMP35-2-RecM1	MZW20791-1302-8_RecM1_S14_L001_R1_001.fastq.gz
MZW20791-1302-82-RecM1_S14_L001_R2_001.fastq.gz	MZW20791.1302.82.RecM1.S14	E0651-2-RecM1	AAMP35	AAMP35-2-RecM1	MZW20791-1302-8_RecM1_S14_L001_R2_001.fastq.gz
MZW20791-1307-2_VagM1_S16_L001_R1_001.fastq.gz	MZW20791.1307.21.VagM1.S16	E0654-1-VagM1	AAMP36	AAMP36-1-VagM1	MZW20791-1307-2_VagM1_S16_L001_R1_001.fastq.gz
MZW20791-1307-2_VagM1_S16_L001_R2_001.fastq.gz	MZW20791.1307.21.VagM1.S16	E0654-1-VagM1	AAMP36	AAMP36-1-VagM1	MZW20791-1307-2_VagM1_S16_L001_R2_001.fastq.gz
MZW20791-1307-81-RecM1_S17_L001_R1_001.fastq.gz	MZW20791.1307.81.RecM1.S17	E0654-1-RecM1	AAMP36	AAMP36-1-RecM1	MZW20791-1307-8_RecM1_S17_L001_R1_001.fastq.gz
MZW20791-1307-81-RecM1_S17_L001_R2_001.fastq.gz	MZW20791.1307.81.RecM1.S17	E0654-1-RecM1	AAMP36	AAMP36-1-RecM1	MZW20791-1307-8_RecM1_S17_L001_R2_001.fastq.gz
MZW20791-1308-22-VagM1_S21_L001_R1_001.fastq.gz	MZW20791.1308.22.VagM1.S21	E0654-2-VagM1	AAMP36	AAMP36-2-VagM1	MZW20791-1308-2_VagM1_S21_L001_R1_001.fastq.gz
MZW20791-1308-22-VagM1_S21_L001_R2_001.fastq.gz	MZW20791.1308.22.VagM1.S21	E0654-2-VagM1	AAMP36	AAMP36-2-VagM1	MZW20791-1308-2_VagM1_S21_L001_R2_001.fastq.gz
MZW20791-1308-82-RecM1_S22_L001_R1_001.fastq.gz	MZW20791.1308.82.RecM1.S22	E0654-2-RecM1	AAMP36	AAMP36-2-RecM1	MZW20791-1308-8_RecM1_S22_L001_R1_001.fastq.gz
MZW20791-1308-82-RecM1_S22_L001_R2_001.fastq.gz	MZW20791.1308.82.RecM1.S22	E0654-2-RecM1	AAMP36	AAMP36-2-RecM1	MZW20791-1308-8_RecM1_S22_L001_R2_001.fastq.gz
MZW20791-1309-2_VagM1_S24_L001_R1_001.fastq.gz	MZW20791.1309.21.VagM1.S24	E0655-1-VagM1	AAMP37	AAMP37-1-VagM1	MZW20791-1309-2_VagM1_S24_L001_R1_001.fastq.gz
MZW20791-1309-2_VagM1_S24_L001_R2_001.fastq.gz	MZW20791.1309.21.VagM1.S24	E0655-1-VagM1	AAMP37	AAMP37-1-VagM1	MZW20791-1309-2_VagM1_S24_L001_R2_001.fastq.gz
MZW20791-1309-81-OraM2_S23_L001_R1_001.fastq.gz	MZW20791.1309.81.OraM2.S23	E0655-1-OraM2	AAMP37	AAMP37-1-OraM2	MZW20791-1309-8_OraM2_S23_L001_R1_001.fastq.gz
MZW20791-1309-81-OraM2_S23_L001_R2_001.fastq.gz	MZW20791.1309.81.OraM2.S23	E0655-1-OraM2	AAMP37	AAMP37-1-OraM2	MZW20791-1309-8_OraM2_S23_L001_R2_001.fastq.gz
MZW20791-1309-81-RecM1_S25_L001_R1_001.fastq.gz	MZW20791.1309.81.RecM1.S25	E0655-1-RecM1	AAMP37	AAMP37-1-RecM1	MZW20791-1309-8_RecM1_S25_L001_R1_001.fastq.gz
MZW20791-1309-81-RecM1_S25_L001_R2_001.fastq.gz	MZW20791.1309.81.RecM1.S25	E0655-1-RecM1	AAMP37	AAMP37-1-RecM1	MZW20791-1309-8_RecM1_S25_L001_R2_001.fastq.gz
MZW20791-1310-22-VagM1_S27_L001_R1_001.fastq.gz	MZW20791.1310.22.VagM1.S27	E0655-2-VagM1	AAMP37	AAMP37-2-VagM1	MZW20791-1310-2_VagM1_S27_L001_R1_001.fastq.gz
MZW20791-1310-22-VagM1_S27_L001_R2_001.fastq.gz	MZW20791.1310.22.VagM1.S27	E0655-2-VagM1	AAMP37	AAMP37-2-VagM1	MZW20791-1310-2_VagM1_S27_L001_R2_001.fastq.gz
MZW20791-1310-62-OraM1_S26_L001_R1_001.fastq.gz	MZW20791.1310.62.OraM1.S26	E0655-2-OraM1	AAMP37	AAMP37-2-OraM1	MZW20791-1310-6_OraM1_S26_L001_R1_001.fastq.gz
MZW20791-1310-62-OraM1_S26_L001_R2_001.fastq.gz	MZW20791.1310.62.OraM1.S26	E0655-2-OraM1	AAMP37	AAMP37-2-OraM1	MZW20791-1310-6_OraM1_S26_L001_R2_001.fastq.gz
MZW20791-1310-82-RecM1_S28_L001_R1_001.fastq.gz	MZW20791.1310.82.RecM1.S28	E0655-2-RecM1	AAMP37	AAMP37-2-RecM1	MZW20791-1310-8_RecM1_S28_L001_R1_001.fastq.gz
MZW20791-1310-82-RecM1_S28_L001_R2_001.fastq.gz	MZW20791.1310.82.RecM1.S28	E0655-2-RecM1	AAMP37	AAMP37-2-RecM1	MZW20791-1310-8_RecM1_S28_L001_R2_001.fastq.gz
MZW20791-1313-2_VagM1_S30_L001_R1_001.fastq.gz	MZW20791.1313.21.VagM1.S30	E0657-1-VagM1	AAMP38	AAMP38-1-VagM1	MZW20791-1313-2_VagM1_S30_L001_R1_001.fastq.gz
MZW20791-1313-2_VagM1_S30_L001_R2_001.fastq.gz	MZW20791.1313.21.VagM1.S30	E0657-1-VagM1	AAMP38	AAMP38-1-VagM1	MZW20791-1313-2_VagM1_S30_L001_R2_001.fastq.gz
MZW20791-1313-61-OraM1_S29_L001_R1_001.fastq.gz	MZW20791.1313.61.OraM1.S29	E0657-1-OraM1	AAMP38	AAMP38-1-OraM1	MZW20791-1313-6_OraM1_S29_L001_R1_001.fastq.gz
MZW20791-1313-61-OraM1_S29_L001_R2_001.fastq.gz	MZW20791.1313.61.OraM1.S29	E0657-1-OraM1	AAMP38	AAMP38-1-OraM1	MZW20791-1313-6_OraM1_S29_L001_R2_001.fastq.gz
MZW20791-1313-81-RecM1_S31_L001_R1_001.fastq.gz	MZW20791.1313.81.RecM1.S31	E0657-1-RecM1	AAMP38	AAMP38-1-RecM1	MZW20791-1313-8_RecM1_S31_L001_R1_001.fastq.gz
MZW20791-1313-81-RecM1_S31_L001_R2_001.fastq.gz	MZW20791.1313.81.RecM1.S31	E0657-1-RecM1	AAMP38	AAMP38-1-RecM1	MZW20791-1313-8_RecM1_S31_L001_R2_001.fastq.gz
MZW20791-1314-22-VagM1_S33_L001_R1_001.fastq.gz	MZW20791.1314.22.VagM1.S33	E0657-2-VagM1	AAMP38	AAMP38-2-VagM1	MZW20791-1314-2_VagM1_S33_L001_R1_001.fastq.gz
MZW20791-1314-22-VagM1_S33_L001_R2_001.fastq.gz	MZW20791.1314.22.VagM1.S33	E0657-2-VagM1	AAMP38	AAMP38-2-VagM1	MZW20791-1314-2_VagM1_S33_L001_R2_001.fastq.gz
MZW20791-1314-82-OraM2_S32_L001_R1_001.fastq.gz	MZW20791.1314.82.OraM2.S32	E0657-2-OraM2	AAMP38	AAMP38-2-OraM2	MZW20791-1314-8_OraM2_S32_L001_R1_001.fastq.gz
MZW20791-1314-82-OraM2_S32_L001_R2_001.fastq.gz	MZW20791.1314.82.OraM2.S32	E0657-2-OraM2	AAMP38	AAMP38-2-OraM2	MZW20791-1314-8_OraM2_S32_L001_R2_001.fastq.gz
MZW20791-1314-82-RecM1_S34_L001_R1_001.fastq.gz	MZW20791.1314.82.RecM1.S34	E0657-2-RecM1	AAMP38	AAMP38-2-RecM1	MZW20791-1314-8_RecM1_S34_L001_R1_001.fastq.gz
MZW20791-1314-82-RecM1_S34_L001_R2_001.fastq.gz	MZW20791.1314.82.RecM1.S34	E0657-2-RecM1	AAMP38	AAMP38-2-RecM1	MZW20791-1314-8_RecM1_S34_L001_R2_001.fastq.gz
MZW20791-1375-2_VagM1_S54_L001_R1_001.fastq.gz	MZW20791.1375.21.VagM1.S54	E0688-1-VagM1	AAMP40	AAMP40-1-VagM1	MZW20791-1375-2_VagM1_S54_L001_R1_001.fastq.gz
MZW20791-1375-2_VagM1_S54_L001_R2_001.fastq.gz	MZW20791.1375.21.VagM1.S54	E0688-1-VagM1	AAMP40	AAMP40-1-VagM1	MZW20791-1375-2_VagM1_S54_L001_R2_001.fastq.gz
MZW20791-1375-61-OraM1_S55_L001_R1_001.fastq.gz	MZW20791.1375.61.OraM1.S55	E0688-1-OraM1	AAMP40	AAMP40-1-OraM1	MZW20791-1375-6_OraM1_S55_L001_R1_001.fastq.gz
MZW20791-1375-61-OraM1_S55_L001_R2_001.fastq.gz	MZW20791.1375.61.OraM1.S55	E0688-1-OraM1	AAMP40	AAMP40-1-OraM1	MZW20791-1375-6_OraM1_S55_L001_R2_001.fastq.gz
MZW20791-1376-22-VagM1_S56_L001_R1_001.fastq.gz	MZW20791.1376.22.VagM1.S56	E0688-2-VagM1	AAMP40	AAMP40-2-VagM1	MZW20791-1376-2_VagM1_S56_L001_R1_001.fastq.gz
MZW20791-1376-22-VagM1_S56_L001_R2_001.fastq.gz	MZW20791.1376.22.VagM1.S56	E0688-2-VagM1	AAMP40	AAMP40-2-VagM1	MZW20791-1376-2_VagM1_S56_L001_R2_001.fastq.gz
MZW20791-1376-62-OraM1_S57_L001_R1_001.fastq.gz	MZW20791.1376.62.OraM1.S57	E0688-2-OraM1	AAMP40	AAMP40-2-OraM1	MZW20791-1376-6_OraM1_S57_L001_R1_001.fastq.gz
MZW20791-1376-62-OraM1_S57_L001_R2_001.fastq.gz	MZW20791.1376.62.OraM1.S57	E0688-2-OraM1	AAMP40	AAMP40-2-OraM1	MZW20791-1376-6_OraM1_S57_L001_R2_001.fastq.gz
MZW20791-9310-12-VagM1_S4_L001_R1_001.fastq.gz	MZW20791.9310.12.VagM1	G0201-2-VagM1	AAMP113	AAMP113-2-VagM1	MZW20791-9310-1_VagM1_S4_L001_R1_001.fastq.gz
MZW20791-9310-12-VagM1_S4_L001_R2_001.fastq.gz	MZW20791.9310.12.VagM1	G0201-2-VagM1	AAMP113	AAMP113-2-VagM1	MZW20791-9310-1_VagM1_S4_L001_R2_001.fastq.gz
MZW20791-9441-11-OraM1_S26_L001_R1_001.fastq.gz	MZW20791.9441.11.OraM1	G0203-1-OraM1	AAMP114	AAMP114-1-OraM1	MZW20791-9441-1_OraM1_S26_L001_R1_001.fastq.gz
MZW20791-9441-11-OraM1_S26_L001_R2_001.fastq.gz	MZW20791.9441.11.OraM1	G0203-1-OraM1	AAMP114	AAMP114-1-OraM1	MZW20791-9441-1_OraM1_S26_L001_R2_001.fastq.gz
MZW20791-9504-12-OraM1_S61_L001_R1_001.fastq.gz	MZW20791.9504.12.OraM1	G0203-2-OraM1	AAMP114	AAMP114-2-OraM1	MZW20791-9504-1_OraM1_S61_L001_R1_001.fastq.gz
MZW20791-9504-12-OraM1_S61_L001_R2_001.fastq.gz	MZW20791.9504.12.OraM1	G0203-2-OraM1	AAMP114	AAMP114-2-OraM1	MZW20791-9504-1_OraM1_S61_L001_R2_001.fastq.gz
MZW20791-9532-1_VagM1_S9_L001_R1_001.fastq.gz	MZW20791.9532.11.VagM1	G0204-1-VagM1	AAMP115	AAMP115-1-VagM1	MZW20791-9532-1_VagM1_S9_L001_R1_001.fastq.gz
MZW20791-9532-1_VagM1_S9_L001_R2_001.fastq.gz	MZW20791.9532.11.VagM1	G0204-1-VagM1	AAMP115	AAMP115-1-VagM1	MZW20791-9532-1_VagM1_S9_L001_R2_001.fastq.gz
MZW20791-9536-11-OraM1_S21_L001_R1_001.fastq.gz	MZW20791.9536.11.OraM1	G0204-1-OraM1	AAMP115	AAMP115-1-OraM1	MZW20791-9536-1_OraM1_S21_L001_R1_001.fastq.gz
MZW20791-9536-11-OraM1_S21_L001_R2_001.fastq.gz	MZW20791.9536.11.OraM1	G0204-1-OraM1	AAMP115	AAMP115-1-OraM1	MZW20791-9536-1_OraM1_S21_L001_R2_001.fastq.gz
MZW20791-9595-12-VagM1_S43_L001_R1_001.fastq.gz	MZW20791.9595.12.VagM1	G0204-2-VagM1	AAMP115	AAMP115-2-VagM1	MZW20791-9595-1_VagM1_S43_L001_R1_001.fastq.gz
MZW20791-9595-12-VagM1_S43_L001_R2_001.fastq.gz	MZW20791.9595.12.VagM1	G0204-2-VagM1	AAMP115	AAMP115-2-VagM1	MZW20791-9595-1_VagM1_S43_L001_R2_001.fastq.gz
MZW20791-9599-12-OraM1_S55_L001_R1_001.fastq.gz	MZW20791.9599.12.OraM1	G0204-2-OraM1	AAMP115	AAMP115-2-OraM1	MZW20791-9599-1_OraM1_S55_L001_R1_001.fastq.gz
MZW20791-9599-12-OraM1_S55_L001_R2_001.fastq.gz	MZW20791.9599.12.OraM1	G0204-2-OraM1	AAMP115	AAMP115-2-OraM1	MZW20791-9599-1_OraM1_S55_L001_R2_001.fastq.gz
MZW20791-9817-1_VagM1_S75_L001_R1_001.fastq.gz	MZW20791.9817.11.VagM1	G0207-1-VagM1	AAMP116	AAMP116-1-VagM1	MZW20791-9817-1_VagM1_S75_L001_R1_001.fastq.gz
MZW20791-9817-1_VagM1_S75_L001_R2_001.fastq.gz	MZW20791.9817.11.VagM1	G0207-1-VagM1	AAMP116	AAMP116-1-VagM1	MZW20791-9817-1_VagM1_S75_L001_R2_001.fastq.gz
MZW20791-9880-12-VagM1_S22_L001_R1_001.fastq.gz	MZW20791.9880.12.VagM1	G0207-2-VagM1	AAMP116	AAMP116-2-VagM1	MZW20791-9880-1_VagM1_S22_L001_R1_001.fastq.gz
MZW20791-9880-12-VagM1_S22_L001_R2_001.fastq.gz	MZW20791.9880.12.VagM1	G0207-2-VagM1	AAMP116	AAMP116-2-VagM1	MZW20791-9880-1_VagM1_S22_L001_R2_001.fastq.gz
MZW20791-9912-1_VagM1_S56_L001_R1_001.fastq.gz	MZW20791.9912.11.VagM1	G0208-1-VagM1	AAMP117	AAMP117-1-VagM1	MZW20791-9912-1_VagM1_S56_L001_R1_001.fastq.gz
MZW20791-9912-1_VagM1_S56_L001_R2_001.fastq.gz	MZW20791.9912.11.VagM1	G0208-1-VagM1	AAMP117	AAMP117-1-VagM1	MZW20791-9912-1_VagM1_S56_L001_R2_001.fastq.gz
MZW20791-9916-11-OraM1_S66_L001_R1_001.fastq.gz	MZW20791.9916.11.OraM1	G0208-1-OraM1	AAMP117	AAMP117-1-OraM1	MZW20791-9916-1_OraM1_S66_L001_R1_001.fastq.gz
MZW20791-9916-11-OraM1_S66_L001_R2_001.fastq.gz	MZW20791.9916.11.OraM1	G0208-1-OraM1	AAMP117	AAMP117-1-OraM1	MZW20791-9916-1_OraM1_S66_L001_R2_001.fastq.gz
MZW20791-9975-12-VagM1_S87_L001_R1_001.fastq.gz	MZW20791.9975.12.VagM1	G0208-2-VagM1	AAMP117	AAMP117-2-VagM1	MZW20791-9975-1_VagM1_S87_L001_R1_001.fastq.gz
MZW20791-9975-12-VagM1_S87_L001_R2_001.fastq.gz	MZW20791.9975.12.VagM1	G0208-2-VagM1	AAMP117	AAMP117-2-VagM1	MZW20791-9975-1_VagM1_S87_L001_R2_001.fastq.gz
MZW20791-9979-12-OraM1_S11_L001_R1_001.fastq.gz	MZW20791.9979.12.OraM1	G0208-2-OraM1	AAMP117	AAMP117-2-OraM1	MZW20791-9979-1_OraM1_S11_L001_R1_001.fastq.gz
MZW20791-9979-12-OraM1_S11_L001_R2_001.fastq.gz	MZW20791.9979.12.OraM1	G0208-2-OraM1	AAMP117	AAMP117-2-OraM1	MZW20791-9979-1_OraM1_S11_L001_R2_001.fastq.gz
MZW20791_0021.2.1_G0011_1_VagM1_S26_L001_R1_001.fastq.gz	G0011.1.VagM1.S26	G0011-1-VagM1	AAMP41	AAMP41-1-VagM1	MZW20791_0021.2.1_VagM1_S26_L001_R1_001.fastq.gz
MZW20791_0021.2.1_G0011_1_VagM1_S26_L001_R2_001.fastq.gz	G0011.1.VagM1.S26	G0011-1-VagM1	AAMP41	AAMP41-1-VagM1	MZW20791_0021.2.1_VagM1_S26_L001_R2_001.fastq.gz
MZW20791_0021.6.2_G0011_1_OraM1_S14_L001_R1_001.fastq.gz	G0011.1.OraM1.S14	G0011-1-OraM1	AAMP41	AAMP41-1-OraM1	MZW20791_0021.6.2_OraM1_S14_L001_R1_001.fastq.gz
MZW20791_0021.6.2_G0011_1_OraM1_S14_L001_R2_001.fastq.gz	G0011.1.OraM1.S14	G0011-1-OraM1	AAMP41	AAMP41-1-OraM1	MZW20791_0021.6.2_OraM1_S14_L001_R2_001.fastq.gz
MZW20791_0022.2.1_G0011_2_VagM1_S62_L001_R1_001.fastq.gz	G0011.2.VagM1.S62	G0011-2-VagM1	AAMP41	AAMP41-2-VagM1	MZW20791_0022.2.1_VagM1_S62_L001_R1_001.fastq.gz
MZW20791_0022.2.1_G0011_2_VagM1_S62_L001_R2_001.fastq.gz	G0011.2.VagM1.S62	G0011-2-VagM1	AAMP41	AAMP41-2-VagM1	MZW20791_0022.2.1_VagM1_S62_L001_R2_001.fastq.gz
MZW20791_0022.6.1_G0011_2_OraM1_S50_L001_R1_001.fastq.gz	G0011.2.OraM1.S50	G0011-2-OraM1	AAMP41	AAMP41-2-OraM1	MZW20791_0022.6.1_OraM1_S50_L001_R1_001.fastq.gz
MZW20791_0022.6.1_G0011_2_OraM1_S50_L001_R2_001.fastq.gz	G0011.2.OraM1.S50	G0011-2-OraM1	AAMP41	AAMP41-2-OraM1	MZW20791_0022.6.1_OraM1_S50_L001_R2_001.fastq.gz
MZW20791_0023.2.1_G0012_1_VagM1_S3_L001_R1_001.fastq.gz	G0012.1.VagM1.S3	G0012-1-VagM1	AAMP42	AAMP42-1-VagM1	MZW20791_0023.2.1_VagM1_S3_L001_R1_001.fastq.gz
MZW20791_0023.2.1_G0012_1_VagM1_S3_L001_R2_001.fastq.gz	G0012.1.VagM1.S3	G0012-1-VagM1	AAMP42	AAMP42-1-VagM1	MZW20791_0023.2.1_VagM1_S3_L001_R2_001.fastq.gz
MZW20791_0023.6.1_G0012_1_OraM1_S86_L001_R1_001.fastq.gz	G0012.1.OraM1.S86	G0012-1-OraM1	AAMP42	AAMP42-1-OraM1	MZW20791_0023.6.1_OraM1_S86_L001_R1_001.fastq.gz
MZW20791_0023.6.1_G0012_1_OraM1_S86_L001_R2_001.fastq.gz	G0012.1.OraM1.S86	G0012-1-OraM1	AAMP42	AAMP42-1-OraM1	MZW20791_0023.6.1_OraM1_S86_L001_R2_001.fastq.gz
MZW20791_0023.8.1_G0012_1_RecM1_S15_L001_R1_001.fastq.gz	G0012.1.RecM1.S15	G0012-1-RecM1	AAMP42	AAMP42-1-RecM1	MZW20791_0023.8.1_RecM1_S15_L001_R1_001.fastq.gz
MZW20791_0023.8.1_G0012_1_RecM1_S15_L001_R2_001.fastq.gz	G0012.1.RecM1.S15	G0012-1-RecM1	AAMP42	AAMP42-1-RecM1	MZW20791_0023.8.1_RecM1_S15_L001_R2_001.fastq.gz
MZW20791_0024.2.1_G0012_2_VagM1_S16_L001_R1_001.fastq.gz	G0012.2.VagM1.S16	G0012-2-VagM1	AAMP42	AAMP42-2-VagM1	MZW20791_0024.2.1_VagM1_S16_L001_R1_001.fastq.gz
MZW20791_0024.2.1_G0012_2_VagM1_S16_L001_R2_001.fastq.gz	G0012.2.VagM1.S16	G0012-2-VagM1	AAMP42	AAMP42-2-VagM1	MZW20791_0024.2.1_VagM1_S16_L001_R2_001.fastq.gz
MZW20791_0024.6.1_G0012_2_OraM1_S4_L001_R1_001.fastq.gz	G0012.2.OraM1.S4	G0012-2-OraM1	AAMP42	AAMP42-2-OraM1	MZW20791_0024.6.1_OraM1_S4_L001_R1_001.fastq.gz
MZW20791_0024.6.1_G0012_2_OraM1_S4_L001_R2_001.fastq.gz	G0012.2.OraM1.S4	G0012-2-OraM1	AAMP42	AAMP42-2-OraM1	MZW20791_0024.6.1_OraM1_S4_L001_R2_001.fastq.gz
MZW20791_0024.8.1_G0012_2_RecM1_S28_L001_R1_001.fastq.gz	G0012.2.RecM1.S28	G0012-2-RecM1	AAMP42	AAMP42-2-RecM1	MZW20791_0024.8.1_RecM1_S28_L001_R1_001.fastq.gz
MZW20791_0024.8.1_G0012_2_RecM1_S28_L001_R2_001.fastq.gz	G0012.2.RecM1.S28	G0012-2-RecM1	AAMP42	AAMP42-2-RecM1	MZW20791_0024.8.1_RecM1_S28_L001_R2_001.fastq.gz
MZW20791_0043.2.1_G0022_1_VagM1_S65_L001_R1_001.fastq.gz	G0022.1.VagM1.S65	G0022-1-VagM1	AAMP47	AAMP47-1-VagM1	MZW20791_0043.2.1_VagM1_S65_L001_R1_001.fastq.gz
MZW20791_0043.2.1_G0022_1_VagM1_S65_L001_R2_001.fastq.gz	G0022.1.VagM1.S65	G0022-1-VagM1	AAMP47	AAMP47-1-VagM1	MZW20791_0043.2.1_VagM1_S65_L001_R2_001.fastq.gz
MZW20791_0043.6.1_G0022_1_OraM1_S53_L001_R1_001.fastq.gz	G0022.1.OraM1.S53	G0022-1-OraM1	AAMP47	AAMP47-1-OraM1	MZW20791_0043.6.1_OraM1_S53_L001_R1_001.fastq.gz
MZW20791_0043.6.1_G0022_1_OraM1_S53_L001_R2_001.fastq.gz	G0022.1.OraM1.S53	G0022-1-OraM1	AAMP47	AAMP47-1-OraM1	MZW20791_0043.6.1_OraM1_S53_L001_R2_001.fastq.gz
MZW20791_0043.8.1_G0022_1_RecM1_S77_L001_R1_001.fastq.gz	G0022.1.RecM1.S77	G0022-1-RecM1	AAMP47	AAMP47-1-RecM1	MZW20791_0043.8.1_RecM1_S77_L001_R1_001.fastq.gz
MZW20791_0043.8.1_G0022_1_RecM1_S77_L001_R2_001.fastq.gz	G0022.1.RecM1.S77	G0022-1-RecM1	AAMP47	AAMP47-1-RecM1	MZW20791_0043.8.1_RecM1_S77_L001_R2_001.fastq.gz
MZW20791_0044.2.1_G0022_2_VagM1_S6_L001_R1_001.fastq.gz	G0022.2.VagM1.S6	G0022-2-VagM1	AAMP47	AAMP47-2-VagM1	MZW20791_0044.2.1_VagM1_S6_L001_R1_001.fastq.gz
MZW20791_0044.2.1_G0022_2_VagM1_S6_L001_R2_001.fastq.gz	G0022.2.VagM1.S6	G0022-2-VagM1	AAMP47	AAMP47-2-VagM1	MZW20791_0044.2.1_VagM1_S6_L001_R2_001.fastq.gz
MZW20791_0044.6.1_G0022_2_OraM1_S89_L001_R1_001.fastq.gz	G0022.2.OraM1.S89	G0022-2-OraM1	AAMP47	AAMP47-2-OraM1	MZW20791_0044.6.1_OraM1_S89_L001_R1_001.fastq.gz
MZW20791_0044.6.1_G0022_2_OraM1_S89_L001_R2_001.fastq.gz	G0022.2.OraM1.S89	G0022-2-OraM1	AAMP47	AAMP47-2-OraM1	MZW20791_0044.6.1_OraM1_S89_L001_R2_001.fastq.gz
MZW20791_0044.8.1_G0022_2_RecM1_S18_L001_R1_001.fastq.gz	G0022.2.RecM1.S18	G0022-2-RecM1	AAMP47	AAMP47-2-RecM1	MZW20791_0044.8.1_RecM1_S18_L001_R1_001.fastq.gz
MZW20791_0044.8.1_G0022_2_RecM1_S18_L001_R2_001.fastq.gz	G0022.2.RecM1.S18	G0022-2-RecM1	AAMP47	AAMP47-2-RecM1	MZW20791_0044.8.1_RecM1_S18_L001_R2_001.fastq.gz
MZW20791_0061.2.1_G0030_1_VagM1_S88_L001_R1_001.fastq.gz	G0030.1.VagM1.S88	G0030-1-VagM1	AAMP52	AAMP52-1-VagM1	MZW20791_0061.2.1_VagM1_S88_L001_R1_001.fastq.gz
MZW20791_0061.2.1_G0030_1_VagM1_S88_L001_R2_001.fastq.gz	G0030.1.VagM1.S88	G0030-1-VagM1	AAMP52	AAMP52-1-VagM1	MZW20791_0061.2.1_VagM1_S88_L001_R2_001.fastq.gz
MZW20791_0061.6.1_G0030_1_OraM1_S76_L001_R1_001.fastq.gz	G0030.1.OraM1.S76	G0030-1-OraM1	AAMP52	AAMP52-1-OraM1	MZW20791_0061.6.1_OraM1_S76_L001_R1_001.fastq.gz
MZW20791_0061.6.1_G0030_1_OraM1_S76_L001_R2_001.fastq.gz	G0030.1.OraM1.S76	G0030-1-OraM1	AAMP52	AAMP52-1-OraM1	MZW20791_0061.6.1_OraM1_S76_L001_R2_001.fastq.gz
MZW20791_0061.8.1_G0030_1_RecM1_S5_L001_R1_001.fastq.gz	G0030.1.RecM1.S5	G0030-1-RecM1	AAMP52	AAMP52-1-RecM1	MZW20791_0061.8.1_RecM1_S5_L001_R1_001.fastq.gz
MZW20791_0061.8.1_G0030_1_RecM1_S5_L001_R2_001.fastq.gz	G0030.1.RecM1.S5	G0030-1-RecM1	AAMP52	AAMP52-1-RecM1	MZW20791_0061.8.1_RecM1_S5_L001_R2_001.fastq.gz
MZW20791_0062.2.1_G0030_2_VagM1_S29_L001_R1_001.fastq.gz	G0030.2.VagM1.S29	G0030-2-VagM1	AAMP52	AAMP52-2-VagM1	MZW20791_0062.2.1_VagM1_S29_L001_R1_001.fastq.gz
MZW20791_0062.2.1_G0030_2_VagM1_S29_L001_R2_001.fastq.gz	G0030.2.VagM1.S29	G0030-2-VagM1	AAMP52	AAMP52-2-VagM1	MZW20791_0062.2.1_VagM1_S29_L001_R2_001.fastq.gz
MZW20791_0062.6.1_G0030_2_OraM1_S17_L001_R1_001.fastq.gz	G0030.2.OraM1.S17	G0030-2-OraM1	AAMP52	AAMP52-2-OraM1	MZW20791_0062.6.1_OraM1_S17_L001_R1_001.fastq.gz
MZW20791_0062.6.1_G0030_2_OraM1_S17_L001_R2_001.fastq.gz	G0030.2.OraM1.S17	G0030-2-OraM1	AAMP52	AAMP52-2-OraM1	MZW20791_0062.6.1_OraM1_S17_L001_R2_001.fastq.gz
MZW20791_0062.8.1_G0030_2_RecM1_S41_L001_R1_001.fastq.gz	G0030.2.RecM1.S41	G0030-2-RecM1	AAMP52	AAMP52-2-RecM1	MZW20791_0062.8.1_RecM1_S41_L001_R1_001.fastq.gz
MZW20791_0062.8.1_G0030_2_RecM1_S41_L001_R2_001.fastq.gz	G0030.2.RecM1.S41	G0030-2-RecM1	AAMP52	AAMP52-2-RecM1	MZW20791_0062.8.1_RecM1_S41_L001_R2_001.fastq.gz
MZW20791_0069.2.1_G0035_1_VagM1_S18_L001_R1_001.fastq.gz	G0035.1.VagM1.S18	G0035-1-VagM1	AAMP54	AAMP54-1-VagM1	MZW20791_0069.2.1_VagM1_S18_L001_R1_001.fastq.gz
MZW20791_0069.2.1_G0035_1_VagM1_S18_L001_R2_001.fastq.gz	G0035.1.VagM1.S18	G0035-1-VagM1	AAMP54	AAMP54-1-VagM1	MZW20791_0069.2.1_VagM1_S18_L001_R2_001.fastq.gz
MZW20791_0069.6.1_G0035_1_OraM1_S6_L001_R1_001.fastq.gz	G0035.1.OraM1.S6	G0035-1-OraM1	AAMP54	AAMP54-1-OraM1	MZW20791_0069.6.1_OraM1_S6_L001_R1_001.fastq.gz
MZW20791_0069.6.1_G0035_1_OraM1_S6_L001_R2_001.fastq.gz	G0035.1.OraM1.S6	G0035-1-OraM1	AAMP54	AAMP54-1-OraM1	MZW20791_0069.6.1_OraM1_S6_L001_R2_001.fastq.gz
MZW20791_0069.8.1_G0035_1_RecM1_S30_L001_R1_001.fastq.gz	G0035.1.RecM1.S30	G0035-1-RecM1	AAMP54	AAMP54-1-RecM1	MZW20791_0069.8.1_RecM1_S30_L001_R1_001.fastq.gz
MZW20791_0069.8.1_G0035_1_RecM1_S30_L001_R2_001.fastq.gz	G0035.1.RecM1.S30	G0035-1-RecM1	AAMP54	AAMP54-1-RecM1	MZW20791_0069.8.1_RecM1_S30_L001_R2_001.fastq.gz
MZW20791_0070.2.1_G0035_2_VagM1_S54_L001_R1_001.fastq.gz	G0035.2.VagM1.S54	G0035-2-VagM1	AAMP54	AAMP54-2-VagM1	MZW20791_0070.2.1_VagM1_S54_L001_R1_001.fastq.gz
MZW20791_0070.2.1_G0035_2_VagM1_S54_L001_R2_001.fastq.gz	G0035.2.VagM1.S54	G0035-2-VagM1	AAMP54	AAMP54-2-VagM1	MZW20791_0070.2.1_VagM1_S54_L001_R2_001.fastq.gz
MZW20791_0070.6.1_G0035_2_OraM1_S42_L001_R1_001.fastq.gz	G0035.2.OraM1.S42	G0035-2-OraM1	AAMP54	AAMP54-2-OraM1	MZW20791_0070.6.1_OraM1_S42_L001_R1_001.fastq.gz
MZW20791_0070.6.1_G0035_2_OraM1_S42_L001_R2_001.fastq.gz	G0035.2.OraM1.S42	G0035-2-OraM1	AAMP54	AAMP54-2-OraM1	MZW20791_0070.6.1_OraM1_S42_L001_R2_001.fastq.gz
MZW20791_0070.8.1_G0035_2_RecM1_S66_L001_R1_001.fastq.gz	G0035.2.RecM1.S66	G0035-2-RecM1	AAMP54	AAMP54-2-RecM1	MZW20791_0070.8.1_RecM1_S66_L001_R1_001.fastq.gz
MZW20791_0070.8.1_G0035_2_RecM1_S66_L001_R2_001.fastq.gz	G0035.2.RecM1.S66	G0035-2-RecM1	AAMP54	AAMP54-2-RecM1	MZW20791_0070.8.1_RecM1_S66_L001_R2_001.fastq.gz
MZW20791_0073.2.1_G0037_1_VagM1_S19_L001_R1_001.fastq.gz	G0037.1.VagM1.S19	G0037-1-VagM1	AAMP55	AAMP55-1-VagM1	MZW20791_0073.2.1_VagM1_S19_L001_R1_001.fastq.gz
MZW20791_0073.2.1_G0037_1_VagM1_S19_L001_R2_001.fastq.gz	G0037.1.VagM1.S19	G0037-1-VagM1	AAMP55	AAMP55-1-VagM1	MZW20791_0073.2.1_VagM1_S19_L001_R2_001.fastq.gz
MZW20791_0073.6.1_G0037_1_OraM1_S7_L001_R1_001.fastq.gz	G0037.1.OraM1.S7	G0037-1-OraM1	AAMP55	AAMP55-1-OraM1	MZW20791_0073.6.1_OraM1_S7_L001_R1_001.fastq.gz
MZW20791_0073.6.1_G0037_1_OraM1_S7_L001_R2_001.fastq.gz	G0037.1.OraM1.S7	G0037-1-OraM1	AAMP55	AAMP55-1-OraM1	MZW20791_0073.6.1_OraM1_S7_L001_R2_001.fastq.gz
MZW20791_0073.8.1_G0037_1_RecM1_S31_L001_R1_001.fastq.gz	G0037.1.RecM1.S31	G0037-1-RecM1	AAMP55	AAMP55-1-RecM1	MZW20791_0073.8.1_RecM1_S31_L001_R1_001.fastq.gz
MZW20791_0073.8.1_G0037_1_RecM1_S31_L001_R2_001.fastq.gz	G0037.1.RecM1.S31	G0037-1-RecM1	AAMP55	AAMP55-1-RecM1	MZW20791_0073.8.1_RecM1_S31_L001_R2_001.fastq.gz
MZW20791_0074.2.1_G0037_2_VagM1_S55_L001_R1_001.fastq.gz	G0037.2.VagM1.S55	G0037-2-VagM1	AAMP55	AAMP55-2-VagM1	MZW20791_0074.2.1_VagM1_S55_L001_R1_001.fastq.gz
MZW20791_0074.2.1_G0037_2_VagM1_S55_L001_R2_001.fastq.gz	G0037.2.VagM1.S55	G0037-2-VagM1	AAMP55	AAMP55-2-VagM1	MZW20791_0074.2.1_VagM1_S55_L001_R2_001.fastq.gz
MZW20791_0074.6.1_G0037_2_OraM1_S43_L001_R1_001.fastq.gz	G0037.2.OraM1.S43	G0037-2-OraM1	AAMP55	AAMP55-2-OraM1	MZW20791_0074.6.1_OraM1_S43_L001_R1_001.fastq.gz
MZW20791_0074.6.1_G0037_2_OraM1_S43_L001_R2_001.fastq.gz	G0037.2.OraM1.S43	G0037-2-OraM1	AAMP55	AAMP55-2-OraM1	MZW20791_0074.6.1_OraM1_S43_L001_R2_001.fastq.gz
MZW20791_0074.8.1_G0037_2_RecM1_S67_L001_R1_001.fastq.gz	G0037.2.RecM1.S67	G0037-2-RecM1	AAMP55	AAMP55-2-RecM1	MZW20791_0074.8.1_RecM1_S67_L001_R1_001.fastq.gz
MZW20791_0074.8.1_G0037_2_RecM1_S67_L001_R2_001.fastq.gz	G0037.2.RecM1.S67	G0037-2-RecM1	AAMP55	AAMP55-2-RecM1	MZW20791_0074.8.1_RecM1_S67_L001_R2_001.fastq.gz
MZW20791_0075.2.1_G0038_1_VagM1_S91_L001_R1_001.fastq.gz	G0038.1.VagM1.S91	G0038-1-VagM1	AAMP56	AAMP56-1-VagM1	MZW20791_0075.2.1_VagM1_S91_L001_R1_001.fastq.gz
MZW20791_0075.2.1_G0038_1_VagM1_S91_L001_R2_001.fastq.gz	G0038.1.VagM1.S91	G0038-1-VagM1	AAMP56	AAMP56-1-VagM1	MZW20791_0075.2.1_VagM1_S91_L001_R2_001.fastq.gz
MZW20791_0075.6.1_G0038_1_OraM1_S79_L001_R1_001.fastq.gz	G0038.1.OraM1.S79	G0038-1-OraM1	AAMP56	AAMP56-1-OraM1	MZW20791_0075.6.1_OraM1_S79_L001_R1_001.fastq.gz
MZW20791_0075.6.1_G0038_1_OraM1_S79_L001_R2_001.fastq.gz	G0038.1.OraM1.S79	G0038-1-OraM1	AAMP56	AAMP56-1-OraM1	MZW20791_0075.6.1_OraM1_S79_L001_R2_001.fastq.gz
MZW20791_0075.8.1_G0038_1_RecM1_S8_L001_R1_001.fastq.gz	G0038.1.RecM1.S8	G0038-1-RecM1	AAMP56	AAMP56-1-RecM1	MZW20791_0075.8.1_RecM1_S8_L001_R1_001.fastq.gz
MZW20791_0075.8.1_G0038_1_RecM1_S8_L001_R2_001.fastq.gz	G0038.1.RecM1.S8	G0038-1-RecM1	AAMP56	AAMP56-1-RecM1	MZW20791_0075.8.1_RecM1_S8_L001_R2_001.fastq.gz
MZW20791_0076.2.1_G0038_2_VagM1_S32_L001_R1_001.fastq.gz	G0038.2.VagM1.S32	G0038-2-VagM1	AAMP56	AAMP56-2-VagM1	MZW20791_0076.2.1_VagM1_S32_L001_R1_001.fastq.gz
MZW20791_0076.2.1_G0038_2_VagM1_S32_L001_R2_001.fastq.gz	G0038.2.VagM1.S32	G0038-2-VagM1	AAMP56	AAMP56-2-VagM1	MZW20791_0076.2.1_VagM1_S32_L001_R2_001.fastq.gz
MZW20791_0076.6.1_G0038_2_OraM1_S20_L001_R1_001.fastq.gz	G0038.2.OraM1.S20	G0038-2-OraM1	AAMP56	AAMP56-2-OraM1	MZW20791_0076.6.1_OraM1_S20_L001_R1_001.fastq.gz
MZW20791_0076.6.1_G0038_2_OraM1_S20_L001_R2_001.fastq.gz	G0038.2.OraM1.S20	G0038-2-OraM1	AAMP56	AAMP56-2-OraM1	MZW20791_0076.6.1_OraM1_S20_L001_R2_001.fastq.gz
MZW20791_0076.8.1_G0038_2_RecM1_S44_L001_R1_001.fastq.gz	G0038.2.RecM1.S44	G0038-2-RecM1	AAMP56	AAMP56-2-RecM1	MZW20791_0076.8.1_RecM1_S44_L001_R1_001.fastq.gz
MZW20791_0076.8.1_G0038_2_RecM1_S44_L001_R2_001.fastq.gz	G0038.2.RecM1.S44	G0038-2-RecM1	AAMP56	AAMP56-2-RecM1	MZW20791_0076.8.1_RecM1_S44_L001_R2_001.fastq.gz
MZW20791_0079.2.1_G0040_1_VagM1_S68_L001_R1_001.fastq.gz	G0040.1.VagM1.S68	G0040-1-VagM1	AAMP58	AAMP58-1-VagM1	MZW20791_0079.2.1_VagM1_S68_L001_R1_001.fastq.gz
MZW20791_0079.2.1_G0040_1_VagM1_S68_L001_R2_001.fastq.gz	G0040.1.VagM1.S68	G0040-1-VagM1	AAMP58	AAMP58-1-VagM1	MZW20791_0079.2.1_VagM1_S68_L001_R2_001.fastq.gz
MZW20791_0079.8.1_G0040_1_RecM1_S80_L001_R1_001.fastq.gz	G0040.1.RecM1.S80	G0040-1-RecM1	AAMP58	AAMP58-1-RecM1	MZW20791_0079.8.1_RecM1_S80_L001_R1_001.fastq.gz
MZW20791_0079.8.1_G0040_1_RecM1_S80_L001_R2_001.fastq.gz	G0040.1.RecM1.S80	G0040-1-RecM1	AAMP58	AAMP58-1-RecM1	MZW20791_0079.8.1_RecM1_S80_L001_R2_001.fastq.gz
MZW20791_0080.2.1_G0040_2_VagM1_S9_L001_R1_001.fastq.gz	G0040.2.VagM1.S9	G0040-2-VagM1	AAMP58	AAMP58-2-VagM1	MZW20791_0080.2.1_VagM1_S9_L001_R1_001.fastq.gz
MZW20791_0080.2.1_G0040_2_VagM1_S9_L001_R2_001.fastq.gz	G0040.2.VagM1.S9	G0040-2-VagM1	AAMP58	AAMP58-2-VagM1	MZW20791_0080.2.1_VagM1_S9_L001_R2_001.fastq.gz
MZW20791_0080.8.1_G0040_2_RecM1_S21_L001_R1_001.fastq.gz	G0040.2.RecM1.S21	G0040-2-RecM1	AAMP58	AAMP58-2-RecM1	MZW20791_0080.8.1_RecM1_S21_L001_R1_001.fastq.gz
MZW20791_0080.8.1_G0040_2_RecM1_S21_L001_R2_001.fastq.gz	G0040.2.RecM1.S21	G0040-2-RecM1	AAMP58	AAMP58-2-RecM1	MZW20791_0080.8.1_RecM1_S21_L001_R2_001.fastq.gz
MZW20791_0091.2.1_G0046_1_VagM1_S94_L001_R1_001.fastq.gz	G0046.1.VagM1.S94	G0046-1-VagM1	AAMP61	AAMP61-1-VagM1	MZW20791_0091.2.1_VagM1_S94_L001_R1_001.fastq.gz
MZW20791_0091.2.1_G0046_1_VagM1_S94_L001_R2_001.fastq.gz	G0046.1.VagM1.S94	G0046-1-VagM1	AAMP61	AAMP61-1-VagM1	MZW20791_0091.2.1_VagM1_S94_L001_R2_001.fastq.gz
MZW20791_0091.6.1_G0046_1_OraM1_S82_L001_R1_001.fastq.gz	G0046.1.OraM1.S82	G0046-1-OraM1	AAMP61	AAMP61-1-OraM1	MZW20791_0091.6.1_OraM1_S82_L001_R1_001.fastq.gz
MZW20791_0091.6.1_G0046_1_OraM1_S82_L001_R2_001.fastq.gz	G0046.1.OraM1.S82	G0046-1-OraM1	AAMP61	AAMP61-1-OraM1	MZW20791_0091.6.1_OraM1_S82_L001_R2_001.fastq.gz
MZW20791_0091.8.1_G0046_1_RecM1_S11_L001_R1_001.fastq.gz	G0046.1.RecM1.S11	G0046-1-RecM1	AAMP61	AAMP61-1-RecM1	MZW20791_0091.8.1_RecM1_S11_L001_R1_001.fastq.gz
MZW20791_0091.8.1_G0046_1_RecM1_S11_L001_R2_001.fastq.gz	G0046.1.RecM1.S11	G0046-1-RecM1	AAMP61	AAMP61-1-RecM1	MZW20791_0091.8.1_RecM1_S11_L001_R2_001.fastq.gz
MZW20791_0092.2.1_G0046_2_VagM1_S35_L001_R1_001.fastq.gz	G0046.2.VagM1.S35	G0046-2-VagM1	AAMP61	AAMP61-2-VagM1	MZW20791_0092.2.1_VagM1_S35_L001_R1_001.fastq.gz
MZW20791_0092.2.1_G0046_2_VagM1_S35_L001_R2_001.fastq.gz	G0046.2.VagM1.S35	G0046-2-VagM1	AAMP61	AAMP61-2-VagM1	MZW20791_0092.2.1_VagM1_S35_L001_R2_001.fastq.gz
MZW20791_0092.6.1_G0046_2_OraM1_S23_L001_R1_001.fastq.gz	G0046.2.OraM1.S23	G0046-2-OraM1	AAMP61	AAMP61-2-OraM1	MZW20791_0092.6.1_OraM1_S23_L001_R1_001.fastq.gz
MZW20791_0092.6.1_G0046_2_OraM1_S23_L001_R2_001.fastq.gz	G0046.2.OraM1.S23	G0046-2-OraM1	AAMP61	AAMP61-2-OraM1	MZW20791_0092.6.1_OraM1_S23_L001_R2_001.fastq.gz
MZW20791_0092.8.1_G0046_2_RecM1_S47_L001_R1_001.fastq.gz	G0046.2.RecM1.S47	G0046-2-RecM1	AAMP61	AAMP61-2-RecM1	MZW20791_0092.8.1_RecM1_S47_L001_R1_001.fastq.gz
MZW20791_0092.8.1_G0046_2_RecM1_S47_L001_R2_001.fastq.gz	G0046.2.RecM1.S47	G0046-2-RecM1	AAMP61	AAMP61-2-RecM1	MZW20791_0092.8.1_RecM1_S47_L001_R2_001.fastq.gz
MZW20791_0095.6.1_G0048_1_OraM1_S59_L001_R1_001.fastq.gz	G0048.1.OraM1.S59	G0048-1-OraM1	AAMP63	AAMP63-1-OraM1	MZW20791_0095.6.1_OraM1_S59_L001_R1_001.fastq.gz
MZW20791_0095.6.1_G0048_1_OraM1_S59_L001_R2_001.fastq.gz	G0048.1.OraM1.S59	G0048-1-OraM1	AAMP63	AAMP63-1-OraM1	MZW20791_0095.6.1_OraM1_S59_L001_R2_001.fastq.gz
MZW20791_0095.8.1_G0048_1_RecM1_S83_L001_R1_001.fastq.gz	G0048.1.RecM1.S83	G0048-1-RecM1	AAMP63	AAMP63-1-RecM1	MZW20791_0095.8.1_RecM1_S83_L001_R1_001.fastq.gz
MZW20791_0095.8.1_G0048_1_RecM1_S83_L001_R2_001.fastq.gz	G0048.1.RecM1.S83	G0048-1-RecM1	AAMP63	AAMP63-1-RecM1	MZW20791_0095.8.1_RecM1_S83_L001_R2_001.fastq.gz
MZW20791_0096.6.1_G0048_2_OraM1_S95_L001_R1_001.fastq.gz	G0048.2.OraM1.S95	G0048-2-OraM1	AAMP63	AAMP63-2-OraM1	MZW20791_0096.6.1_OraM1_S95_L001_R1_001.fastq.gz
MZW20791_0096.6.1_G0048_2_OraM1_S95_L001_R2_001.fastq.gz	G0048.2.OraM1.S95	G0048-2-OraM1	AAMP63	AAMP63-2-OraM1	MZW20791_0096.6.1_OraM1_S95_L001_R2_001.fastq.gz
MZW20791_0096.8.1_G0048_2_RecM1_S24_L001_R1_001.fastq.gz	G0048.2.RecM1.S24	G0048-2-RecM1	AAMP63	AAMP63-2-RecM1	MZW20791_0096.8.1_RecM1_S24_L001_R1_001.fastq.gz
MZW20791_0096.8.1_G0048_2_RecM1_S24_L001_R2_001.fastq.gz	G0048.2.RecM1.S24	G0048-2-RecM1	AAMP63	AAMP63-2-RecM1	MZW20791_0096.8.1_RecM1_S24_L001_R2_001.fastq.gz
MZW20791_0099.2.1_G0050_1_VagM1_S55_L001_R1_001.fastq.gz	G0050.1.VagM1.S55	G0050-1-VagM1	AAMP64	AAMP64-1-VagM1	MZW20791_0099.2.1_VagM1_S55_L001_R1_001.fastq.gz
MZW20791_0099.2.1_G0050_1_VagM1_S55_L001_R2_001.fastq.gz	G0050.1.VagM1.S55	G0050-1-VagM1	AAMP64	AAMP64-1-VagM1	MZW20791_0099.2.1_VagM1_S55_L001_R2_001.fastq.gz
MZW20791_0099.6.1_G0050_1_OraM1_S43_L001_R1_001.fastq.gz	G0050.1.OraM1.S43	G0050-1-OraM1	AAMP64	AAMP64-1-OraM1	MZW20791_0099.6.1_OraM1_S43_L001_R1_001.fastq.gz
MZW20791_0099.6.1_G0050_1_OraM1_S43_L001_R2_001.fastq.gz	G0050.1.OraM1.S43	G0050-1-OraM1	AAMP64	AAMP64-1-OraM1	MZW20791_0099.6.1_OraM1_S43_L001_R2_001.fastq.gz
MZW20791_0099.8.1_G0050_1_RecM1_S67_L001_R1_001.fastq.gz	G0050.1.RecM1.S67	G0050-1-RecM1	AAMP64	AAMP64-1-RecM1	MZW20791_0099.8.1_RecM1_S67_L001_R1_001.fastq.gz
MZW20791_0099.8.1_G0050_1_RecM1_S67_L001_R2_001.fastq.gz	G0050.1.RecM1.S67	G0050-1-RecM1	AAMP64	AAMP64-1-RecM1	MZW20791_0099.8.1_RecM1_S67_L001_R2_001.fastq.gz
MZW20791_0100.2.1_G0050_2_VagM1_S91_L001_R1_001.fastq.gz	G0050.2.VagM1.S91	G0050-2-VagM1	AAMP64	AAMP64-2-VagM1	MZW20791_0100.2.1_VagM1_S91_L001_R1_001.fastq.gz
MZW20791_0100.2.1_G0050_2_VagM1_S91_L001_R2_001.fastq.gz	G0050.2.VagM1.S91	G0050-2-VagM1	AAMP64	AAMP64-2-VagM1	MZW20791_0100.2.1_VagM1_S91_L001_R2_001.fastq.gz
MZW20791_0100.6.1_G0050_2_OraM1_S79_L001_R1_001.fastq.gz	G0050.2.OraM1.S79	G0050-2-OraM1	AAMP64	AAMP64-2-OraM1	MZW20791_0100.6.1_OraM1_S79_L001_R1_001.fastq.gz
MZW20791_0100.6.1_G0050_2_OraM1_S79_L001_R2_001.fastq.gz	G0050.2.OraM1.S79	G0050-2-OraM1	AAMP64	AAMP64-2-OraM1	MZW20791_0100.6.1_OraM1_S79_L001_R2_001.fastq.gz
MZW20791_0100.8.1_G0050_2_RecM1_S8_L001_R1_001.fastq.gz	G0050.2.RecM1.S8	G0050-2-RecM1	AAMP64	AAMP64-2-RecM1	MZW20791_0100.8.1_RecM1_S8_L001_R1_001.fastq.gz
MZW20791_0100.8.1_G0050_2_RecM1_S8_L001_R2_001.fastq.gz	G0050.2.RecM1.S8	G0050-2-RecM1	AAMP64	AAMP64-2-RecM1	MZW20791_0100.8.1_RecM1_S8_L001_R2_001.fastq.gz
MZW20791_0101.2.1_G0051_1_VagM1_S44_L001_R1_001.fastq.gz	G0051.1.VagM1.S44	G0051-1-VagM1	AAMP65	AAMP65-1-VagM1	MZW20791_0101.2.1_VagM1_S44_L001_R1_001.fastq.gz
MZW20791_0101.2.1_G0051_1_VagM1_S44_L001_R2_001.fastq.gz	G0051.1.VagM1.S44	G0051-1-VagM1	AAMP65	AAMP65-1-VagM1	MZW20791_0101.2.1_VagM1_S44_L001_R2_001.fastq.gz
MZW20791_0101.6.1_G0051_1_OraM1_S32_L001_R1_001.fastq.gz	G0051.1.OraM1.S32	G0051-1-OraM1	AAMP65	AAMP65-1-OraM1	MZW20791_0101.6.1_OraM1_S32_L001_R1_001.fastq.gz
MZW20791_0101.6.1_G0051_1_OraM1_S32_L001_R2_001.fastq.gz	G0051.1.OraM1.S32	G0051-1-OraM1	AAMP65	AAMP65-1-OraM1	MZW20791_0101.6.1_OraM1_S32_L001_R2_001.fastq.gz
MZW20791_0102.2.1_G0051_2_VagM1_S80_L001_R1_001.fastq.gz	G0051.2.VagM1.S80	G0051-2-VagM1	AAMP65	AAMP65-2-VagM1	MZW20791_0102.2.1_VagM1_S80_L001_R1_001.fastq.gz
MZW20791_0102.2.1_G0051_2_VagM1_S80_L001_R2_001.fastq.gz	G0051.2.VagM1.S80	G0051-2-VagM1	AAMP65	AAMP65-2-VagM1	MZW20791_0102.2.1_VagM1_S80_L001_R2_001.fastq.gz
MZW20791_0102.6.1_G0051_2_OraM1_S68_L001_R1_001.fastq.gz	G0051.2.OraM1.S68	G0051-2-OraM1	AAMP65	AAMP65-2-OraM1	MZW20791_0102.6.1_OraM1_S68_L001_R1_001.fastq.gz
MZW20791_0102.6.1_G0051_2_OraM1_S68_L001_R2_001.fastq.gz	G0051.2.OraM1.S68	G0051-2-OraM1	AAMP65	AAMP65-2-OraM1	MZW20791_0102.6.1_OraM1_S68_L001_R2_001.fastq.gz
MZW20791_0109.2.1_G0055_1_VagM1_S22_L001_R1_001.fastq.gz	G0055.1.VagM1.S22	G0055-1-VagM1	AAMP68	AAMP68-1-VagM1	MZW20791_0109.2.1_VagM1_S22_L001_R1_001.fastq.gz
MZW20791_0109.2.1_G0055_1_VagM1_S22_L001_R2_001.fastq.gz	G0055.1.VagM1.S22	G0055-1-VagM1	AAMP68	AAMP68-1-VagM1	MZW20791_0109.2.1_VagM1_S22_L001_R2_001.fastq.gz
MZW20791_0109.6.1_G0055_1_OraM1_S10_L001_R1_001.fastq.gz	G0055.1.OraM1.S10	G0055-1-OraM1	AAMP68	AAMP68-1-OraM1	MZW20791_0109.6.1_OraM1_S10_L001_R1_001.fastq.gz
MZW20791_0109.6.1_G0055_1_OraM1_S10_L001_R2_001.fastq.gz	G0055.1.OraM1.S10	G0055-1-OraM1	AAMP68	AAMP68-1-OraM1	MZW20791_0109.6.1_OraM1_S10_L001_R2_001.fastq.gz
MZW20791_0110.2.1_G0055_2_VagM1_S58_L001_R1_001.fastq.gz	G0055.2.VagM1.S58	G0055-2-VagM1	AAMP68	AAMP68-2-VagM1	MZW20791_0110.2.1_VagM1_S58_L001_R1_001.fastq.gz
MZW20791_0110.2.1_G0055_2_VagM1_S58_L001_R2_001.fastq.gz	G0055.2.VagM1.S58	G0055-2-VagM1	AAMP68	AAMP68-2-VagM1	MZW20791_0110.2.1_VagM1_S58_L001_R2_001.fastq.gz
MZW20791_0110.6.1_G0055_2_OraM1_S46_L001_R1_001.fastq.gz	G0055.2.OraM1.S46	G0055-2-OraM1	AAMP68	AAMP68-2-OraM1	MZW20791_0110.6.1_OraM1_S46_L001_R1_001.fastq.gz
MZW20791_0110.6.1_G0055_2_OraM1_S46_L001_R2_001.fastq.gz	G0055.2.OraM1.S46	G0055-2-OraM1	AAMP68	AAMP68-2-OraM1	MZW20791_0110.6.1_OraM1_S46_L001_R2_001.fastq.gz
MZW20791_0111.2.1_G0056_1_VagM1_S11_L001_R1_001.fastq.gz	G0056.1.VagM1.S11	G0056-1-VagM1	AAMP69	AAMP69-1-VagM1	MZW20791_0111.2.1_VagM1_S11_L001_R1_001.fastq.gz
MZW20791_0111.2.1_G0056_1_VagM1_S11_L001_R2_001.fastq.gz	G0056.1.VagM1.S11	G0056-1-VagM1	AAMP69	AAMP69-1-VagM1	MZW20791_0111.2.1_VagM1_S11_L001_R2_001.fastq.gz
MZW20791_0111.6.1_G0056_1_OraM1_S94_L001_R1_001.fastq.gz	G0056.1.OraM1.S94	G0056-1-OraM1	AAMP69	AAMP69-1-OraM1	MZW20791_0111.6.1_OraM1_S94_L001_R1_001.fastq.gz
MZW20791_0111.6.1_G0056_1_OraM1_S94_L001_R2_001.fastq.gz	G0056.1.OraM1.S94	G0056-1-OraM1	AAMP69	AAMP69-1-OraM1	MZW20791_0111.6.1_OraM1_S94_L001_R2_001.fastq.gz
MZW20791_0111.8.1_G0056_1_RecM1_S23_L001_R1_001.fastq.gz	G0056.1.RecM1.S23	G0056-1-RecM1	AAMP69	AAMP69-1-RecM1	MZW20791_0111.8.1_RecM1_S23_L001_R1_001.fastq.gz
MZW20791_0111.8.1_G0056_1_RecM1_S23_L001_R2_001.fastq.gz	G0056.1.RecM1.S23	G0056-1-RecM1	AAMP69	AAMP69-1-RecM1	MZW20791_0111.8.1_RecM1_S23_L001_R2_001.fastq.gz
MZW20791_0112.2.1_G0056_2_VagM1_S47_L001_R1_001.fastq.gz	G0056.2.VagM1.S47	G0056-2-VagM1	AAMP69	AAMP69-2-VagM1	MZW20791_0112.2.1_VagM1_S47_L001_R1_001.fastq.gz
MZW20791_0112.2.1_G0056_2_VagM1_S47_L001_R2_001.fastq.gz	G0056.2.VagM1.S47	G0056-2-VagM1	AAMP69	AAMP69-2-VagM1	MZW20791_0112.2.1_VagM1_S47_L001_R2_001.fastq.gz
MZW20791_0112.6.1_G0056_2_OraM1_S35_L001_R1_001.fastq.gz	G0056.2.OraM1.S35	G0056-2-OraM1	AAMP69	AAMP69-2-OraM1	MZW20791_0112.6.1_OraM1_S35_L001_R1_001.fastq.gz
MZW20791_0112.6.1_G0056_2_OraM1_S35_L001_R2_001.fastq.gz	G0056.2.OraM1.S35	G0056-2-OraM1	AAMP69	AAMP69-2-OraM1	MZW20791_0112.6.1_OraM1_S35_L001_R2_001.fastq.gz
MZW20791_0112.8.1_G0056_2_RecM1_S59_L001_R1_001.fastq.gz	G0056.2.RecM1.S59	G0056-2-RecM1	AAMP69	AAMP69-2-RecM1	MZW20791_0112.8.1_RecM1_S59_L001_R1_001.fastq.gz
MZW20791_0112.8.1_G0056_2_RecM1_S59_L001_R2_001.fastq.gz	G0056.2.RecM1.S59	G0056-2-RecM1	AAMP69	AAMP69-2-RecM1	MZW20791_0112.8.1_RecM1_S59_L001_R2_001.fastq.gz
MZW20791_0117.2.1_G0059_1_VagM1_S1_L001_R1_001.fastq.gz	G0059.1.VagM1.S1	G0059-1-VagM1	AAMP70	AAMP70-1-VagM1	MZW20791_0117.2.1_VagM1_S1_L001_R1_001.fastq.gz
MZW20791_0117.2.1_G0059_1_VagM1_S1_L001_R2_001.fastq.gz	G0059.1.VagM1.S1	G0059-1-VagM1	AAMP70	AAMP70-1-VagM1	MZW20791_0117.2.1_VagM1_S1_L001_R2_001.fastq.gz
MZW20791_0117.6.1_G0059_1_OraM1_S1_L001_R1_001.fastq.gz	G0059.1.OraM1.S1	G0059-1-OraM1	AAMP70	AAMP70-1-OraM1	MZW20791_0117.6.1_OraM1_S1_L001_R1_001.fastq.gz
MZW20791_0117.6.1_G0059_1_OraM1_S1_L001_R2_001.fastq.gz	G0059.1.OraM1.S1	G0059-1-OraM1	AAMP70	AAMP70-1-OraM1	MZW20791_0117.6.1_OraM1_S1_L001_R2_001.fastq.gz
MZW20791_0118.2.1_G0059_2_VagM1_S1_L001_R1_001.fastq.gz	G0059.2.VagM1.S1	G0059-2-VagM1	AAMP70	AAMP70-2-VagM1	MZW20791_0118.2.1_VagM1_S1_L001_R1_001.fastq.gz
MZW20791_0118.2.1_G0059_2_VagM1_S1_L001_R2_001.fastq.gz	G0059.2.VagM1.S1	G0059-2-VagM1	AAMP70	AAMP70-2-VagM1	MZW20791_0118.2.1_VagM1_S1_L001_R2_001.fastq.gz
MZW20791_0118.6.1_G0059_2_OraM1_S1_L001_R1_001.fastq.gz	G0059.2.OraM1.S1	G0059-2-OraM1	AAMP70	AAMP70-2-OraM1	MZW20791_0118.6.1_OraM1_S1_L001_R1_001.fastq.gz
MZW20791_0118.6.1_G0059_2_OraM1_S1_L001_R2_001.fastq.gz	G0059.2.OraM1.S1	G0059-2-OraM1	AAMP70	AAMP70-2-OraM1	MZW20791_0118.6.1_OraM1_S1_L001_R2_001.fastq.gz
MZW20791_0121.2.1_G0061_1_VagM1_S1_L001_R1_001.fastq.gz	G0061.1.VagM1.S1	G0061-1-VagM1	AAMP71	AAMP71-1-VagM1	MZW20791_0121.2.1_VagM1_S1_L001_R1_001.fastq.gz
MZW20791_0121.2.1_G0061_1_VagM1_S1_L001_R2_001.fastq.gz	G0061.1.VagM1.S1	G0061-1-VagM1	AAMP71	AAMP71-1-VagM1	MZW20791_0121.2.1_VagM1_S1_L001_R2_001.fastq.gz
MZW20791_0121.6.1_G0061_1_OraM1_S1_L001_R1_001.fastq.gz	G0061.1.OraM1.S1	G0061-1-OraM1	AAMP71	AAMP71-1-OraM1	MZW20791_0121.6.1_OraM1_S1_L001_R1_001.fastq.gz
MZW20791_0121.6.1_G0061_1_OraM1_S1_L001_R2_001.fastq.gz	G0061.1.OraM1.S1	G0061-1-OraM1	AAMP71	AAMP71-1-OraM1	MZW20791_0121.6.1_OraM1_S1_L001_R2_001.fastq.gz
MZW20791_0122.2.1_G0061_2_VagM1_S1_L001_R1_001.fastq.gz	G0061.2.VagM1.S1	G0061-2-VagM1	AAMP71	AAMP71-2-VagM1	MZW20791_0122.2.1_VagM1_S1_L001_R1_001.fastq.gz
MZW20791_0122.2.1_G0061_2_VagM1_S1_L001_R2_001.fastq.gz	G0061.2.VagM1.S1	G0061-2-VagM1	AAMP71	AAMP71-2-VagM1	MZW20791_0122.2.1_VagM1_S1_L001_R2_001.fastq.gz
MZW20791_0122.6.1_G0061_2_OraM1_S1_L001_R1_001.fastq.gz	G0061.2.OraM1.S1	G0061-2-OraM1	AAMP71	AAMP71-2-OraM1	MZW20791_0122.6.1_OraM1_S1_L001_R1_001.fastq.gz
MZW20791_0122.6.1_G0061_2_OraM1_S1_L001_R2_001.fastq.gz	G0061.2.OraM1.S1	G0061-2-OraM1	AAMP71	AAMP71-2-OraM1	MZW20791_0122.6.1_OraM1_S1_L001_R2_001.fastq.gz
MZW20791_0123.2.1_G0062_1_VagM1_S1_L001_R1_001.fastq.gz	G0062.1.VagM1.S1	G0062-1-VagM1	AAMP72	AAMP72-1-VagM1	MZW20791_0123.2.1_VagM1_S1_L001_R1_001.fastq.gz
MZW20791_0123.2.1_G0062_1_VagM1_S1_L001_R2_001.fastq.gz	G0062.1.VagM1.S1	G0062-1-VagM1	AAMP72	AAMP72-1-VagM1	MZW20791_0123.2.1_VagM1_S1_L001_R2_001.fastq.gz
MZW20791_0123.6.1_G0062_1_OraM1_S1_L001_R1_001.fastq.gz	G0062.1.OraM1.S1	G0062-1-OraM1	AAMP72	AAMP72-1-OraM1	MZW20791_0123.6.1_OraM1_S1_L001_R1_001.fastq.gz
MZW20791_0123.6.1_G0062_1_OraM1_S1_L001_R2_001.fastq.gz	G0062.1.OraM1.S1	G0062-1-OraM1	AAMP72	AAMP72-1-OraM1	MZW20791_0123.6.1_OraM1_S1_L001_R2_001.fastq.gz
MZW20791_0124.2.1_G0062_2_VagM1_S1_L001_R1_001.fastq.gz	G0062.2.VagM1.S1	G0062-2-VagM1	AAMP72	AAMP72-2-VagM1	MZW20791_0124.2.1_VagM1_S1_L001_R1_001.fastq.gz
MZW20791_0124.2.1_G0062_2_VagM1_S1_L001_R2_001.fastq.gz	G0062.2.VagM1.S1	G0062-2-VagM1	AAMP72	AAMP72-2-VagM1	MZW20791_0124.2.1_VagM1_S1_L001_R2_001.fastq.gz
MZW20791_0124.6.1_G0062_2_OraM1_S1_L001_R1_001.fastq.gz	G0062.2.OraM1.S1	G0062-2-OraM1	AAMP72	AAMP72-2-OraM1	MZW20791_0124.6.1_OraM1_S1_L001_R1_001.fastq.gz
MZW20791_0124.6.1_G0062_2_OraM1_S1_L001_R2_001.fastq.gz	G0062.2.OraM1.S1	G0062-2-OraM1	AAMP72	AAMP72-2-OraM1	MZW20791_0124.6.1_OraM1_S1_L001_R2_001.fastq.gz
MZW20791_0125.2.1_G0063_1_VagM1_S1_L001_R1_001.fastq.gz	G0063.1.VagM1.S1	G0063-1-VagM1	AAMP73	AAMP73-1-VagM1	MZW20791_0125.2.1_VagM1_S1_L001_R1_001.fastq.gz
MZW20791_0125.2.1_G0063_1_VagM1_S1_L001_R2_001.fastq.gz	G0063.1.VagM1.S1	G0063-1-VagM1	AAMP73	AAMP73-1-VagM1	MZW20791_0125.2.1_VagM1_S1_L001_R2_001.fastq.gz
MZW20791_0125.6.1_G0063_1_OraM1_S1_L001_R1_001.fastq.gz	G0063.1.OraM1.S1	G0063-1-OraM1	AAMP73	AAMP73-1-OraM1	MZW20791_0125.6.1_OraM1_S1_L001_R1_001.fastq.gz
MZW20791_0125.6.1_G0063_1_OraM1_S1_L001_R2_001.fastq.gz	G0063.1.OraM1.S1	G0063-1-OraM1	AAMP73	AAMP73-1-OraM1	MZW20791_0125.6.1_OraM1_S1_L001_R2_001.fastq.gz
MZW20791_0125.8.1_G0063_1_RecM1_S1_L001_R1_001.fastq.gz	G0063.1.RecM1.S1	G0063-1-RecM1	AAMP73	AAMP73-1-RecM1	MZW20791_0125.8.1_RecM1_S1_L001_R1_001.fastq.gz
MZW20791_0125.8.1_G0063_1_RecM1_S1_L001_R2_001.fastq.gz	G0063.1.RecM1.S1	G0063-1-RecM1	AAMP73	AAMP73-1-RecM1	MZW20791_0125.8.1_RecM1_S1_L001_R2_001.fastq.gz
MZW20791_0126.2.1_G0063_2_VagM1_S1_L001_R1_001.fastq.gz	G0063.2.VagM1.S1	G0063-2-VagM1	AAMP73	AAMP73-2-VagM1	MZW20791_0126.2.1_VagM1_S1_L001_R1_001.fastq.gz
MZW20791_0126.2.1_G0063_2_VagM1_S1_L001_R2_001.fastq.gz	G0063.2.VagM1.S1	G0063-2-VagM1	AAMP73	AAMP73-2-VagM1	MZW20791_0126.2.1_VagM1_S1_L001_R2_001.fastq.gz
MZW20791_0126.6.1_G0063_2_OraM1_S1_L001_R1_001.fastq.gz	G0063.2.OraM1.S1	G0063-2-OraM1	AAMP73	AAMP73-2-OraM1	MZW20791_0126.6.1_OraM1_S1_L001_R1_001.fastq.gz
MZW20791_0126.6.1_G0063_2_OraM1_S1_L001_R2_001.fastq.gz	G0063.2.OraM1.S1	G0063-2-OraM1	AAMP73	AAMP73-2-OraM1	MZW20791_0126.6.1_OraM1_S1_L001_R2_001.fastq.gz
MZW20791_0126.8.1_G0063_2_RecM1_S1_L001_R1_001.fastq.gz	G0063.2.RecM1.S1	G0063-2-RecM1	AAMP73	AAMP73-2-RecM1	MZW20791_0126.8.1_RecM1_S1_L001_R1_001.fastq.gz
MZW20791_0126.8.1_G0063_2_RecM1_S1_L001_R2_001.fastq.gz	G0063.2.RecM1.S1	G0063-2-RecM1	AAMP73	AAMP73-2-RecM1	MZW20791_0126.8.1_RecM1_S1_L001_R2_001.fastq.gz
MZW20791_0127.2.1_G0064_1_VagM1_S1_L001_R1_001.fastq.gz	G0064.1.VagM1.S1	G0064-1-VagM1	AAMP74	AAMP74-1-VagM1	MZW20791_0127.2.1_VagM1_S1_L001_R1_001.fastq.gz
MZW20791_0127.2.1_G0064_1_VagM1_S1_L001_R2_001.fastq.gz	G0064.1.VagM1.S1	G0064-1-VagM1	AAMP74	AAMP74-1-VagM1	MZW20791_0127.2.1_VagM1_S1_L001_R2_001.fastq.gz
MZW20791_0127.6.1_G0064_1_OraM1_S1_L001_R1_001.fastq.gz	G0064.1.OraM1.S1	G0064-1-OraM1	AAMP74	AAMP74-1-OraM1	MZW20791_0127.6.1_OraM1_S1_L001_R1_001.fastq.gz
MZW20791_0127.6.1_G0064_1_OraM1_S1_L001_R2_001.fastq.gz	G0064.1.OraM1.S1	G0064-1-OraM1	AAMP74	AAMP74-1-OraM1	MZW20791_0127.6.1_OraM1_S1_L001_R2_001.fastq.gz
MZW20791_0128.2.1_G0064_2_VagM1_S1_L001_R1_001.fastq.gz	G0064.2.VagM1.S1	G0064-2-VagM1	AAMP74	AAMP74-2-VagM1	MZW20791_0128.2.1_VagM1_S1_L001_R1_001.fastq.gz
MZW20791_0128.2.1_G0064_2_VagM1_S1_L001_R2_001.fastq.gz	G0064.2.VagM1.S1	G0064-2-VagM1	AAMP74	AAMP74-2-VagM1	MZW20791_0128.2.1_VagM1_S1_L001_R2_001.fastq.gz
MZW20791_0128.6.1_G0064_2_OraM1_S1_L001_R1_001.fastq.gz	G0064.2.OraM1.S1	G0064-2-OraM1	AAMP74	AAMP74-2-OraM1	MZW20791_0128.6.1_OraM1_S1_L001_R1_001.fastq.gz
MZW20791_0128.6.1_G0064_2_OraM1_S1_L001_R2_001.fastq.gz	G0064.2.OraM1.S1	G0064-2-OraM1	AAMP74	AAMP74-2-OraM1	MZW20791_0128.6.1_OraM1_S1_L001_R2_001.fastq.gz
MZW20791_0129.2.1_G0065_1_VagM1_S1_L001_R1_001.fastq.gz	G0065.1.VagM1.S1	G0065-1-VagM1	AAMP75	AAMP75-1-VagM1	MZW20791_0129.2.1_VagM1_S1_L001_R1_001.fastq.gz
MZW20791_0129.2.1_G0065_1_VagM1_S1_L001_R2_001.fastq.gz	G0065.1.VagM1.S1	G0065-1-VagM1	AAMP75	AAMP75-1-VagM1	MZW20791_0129.2.1_VagM1_S1_L001_R2_001.fastq.gz
MZW20791_0129.6.1_G0065_1_OraM1_S1_L001_R1_001.fastq.gz	G0065.1.OraM1.S1	G0065-1-OraM1	AAMP75	AAMP75-1-OraM1	MZW20791_0129.6.1_OraM1_S1_L001_R1_001.fastq.gz
MZW20791_0129.6.1_G0065_1_OraM1_S1_L001_R2_001.fastq.gz	G0065.1.OraM1.S1	G0065-1-OraM1	AAMP75	AAMP75-1-OraM1	MZW20791_0129.6.1_OraM1_S1_L001_R2_001.fastq.gz
MZW20791_0130.2.1_G0065_2_VagM1_S1_L001_R1_001.fastq.gz	G0065.2.VagM1.S1	G0065-2-VagM1	AAMP75	AAMP75-2-VagM1	MZW20791_0130.2.1_VagM1_S1_L001_R1_001.fastq.gz
MZW20791_0130.2.1_G0065_2_VagM1_S1_L001_R2_001.fastq.gz	G0065.2.VagM1.S1	G0065-2-VagM1	AAMP75	AAMP75-2-VagM1	MZW20791_0130.2.1_VagM1_S1_L001_R2_001.fastq.gz
MZW20791_0130.6.1_G0065_2_OraM1_S1_L001_R1_001.fastq.gz	G0065.2.OraM1.S1	G0065-2-OraM1	AAMP75	AAMP75-2-OraM1	MZW20791_0130.6.1_OraM1_S1_L001_R1_001.fastq.gz
MZW20791_0130.6.1_G0065_2_OraM1_S1_L001_R2_001.fastq.gz	G0065.2.OraM1.S1	G0065-2-OraM1	AAMP75	AAMP75-2-OraM1	MZW20791_0130.6.1_OraM1_S1_L001_R2_001.fastq.gz
MZW20791_0131.2.1_G0066_1_VagM1_S1_L001_R1_001.fastq.gz	G0066.1.VagM1.S1	G0066-1-VagM1	AAMP76	AAMP76-1-VagM1	MZW20791_0131.2.1_VagM1_S1_L001_R1_001.fastq.gz
MZW20791_0131.2.1_G0066_1_VagM1_S1_L001_R2_001.fastq.gz	G0066.1.VagM1.S1	G0066-1-VagM1	AAMP76	AAMP76-1-VagM1	MZW20791_0131.2.1_VagM1_S1_L001_R2_001.fastq.gz
MZW20791_0131.8.1_G0066_1_RecM1_S1_L001_R1_001.fastq.gz	G0066.1.RecM1.S1	G0066-1-RecM1	AAMP76	AAMP76-1-RecM1	MZW20791_0131.8.1_RecM1_S1_L001_R1_001.fastq.gz
MZW20791_0131.8.1_G0066_1_RecM1_S1_L001_R2_001.fastq.gz	G0066.1.RecM1.S1	G0066-1-RecM1	AAMP76	AAMP76-1-RecM1	MZW20791_0131.8.1_RecM1_S1_L001_R2_001.fastq.gz
MZW20791_0132.2.1_G0066_2_VagM1_S1_L001_R1_001.fastq.gz	G0066.2.VagM1.S1	G0066-2-VagM1	AAMP76	AAMP76-2-VagM1	MZW20791_0132.2.1_VagM1_S1_L001_R1_001.fastq.gz
MZW20791_0132.2.1_G0066_2_VagM1_S1_L001_R2_001.fastq.gz	G0066.2.VagM1.S1	G0066-2-VagM1	AAMP76	AAMP76-2-VagM1	MZW20791_0132.2.1_VagM1_S1_L001_R2_001.fastq.gz
MZW20791_0132.8.1_G0066_2_RecM1_S1_L001_R1_001.fastq.gz	G0066.2.RecM1.S1	G0066-2-RecM1	AAMP76	AAMP76-2-RecM1	MZW20791_0132.8.1_RecM1_S1_L001_R1_001.fastq.gz
MZW20791_0132.8.1_G0066_2_RecM1_S1_L001_R2_001.fastq.gz	G0066.2.RecM1.S1	G0066-2-RecM1	AAMP76	AAMP76-2-RecM1	MZW20791_0132.8.1_RecM1_S1_L001_R2_001.fastq.gz
MZW20791_0133.2.1_G0067_1_VagM1_S1_L001_R1_001.fastq.gz	G0067.1.VagM1.S1	G0067-1-VagM1	AAMP77	AAMP77-1-VagM1	MZW20791_0133.2.1_VagM1_S1_L001_R1_001.fastq.gz
MZW20791_0133.2.1_G0067_1_VagM1_S1_L001_R2_001.fastq.gz	G0067.1.VagM1.S1	G0067-1-VagM1	AAMP77	AAMP77-1-VagM1	MZW20791_0133.2.1_VagM1_S1_L001_R2_001.fastq.gz
MZW20791_0133.6.1_G0067_1_OraM1_S1_L001_R1_001.fastq.gz	G0067.1.OraM1.S1	G0067-1-OraM1	AAMP77	AAMP77-1-OraM1	MZW20791_0133.6.1_OraM1_S1_L001_R1_001.fastq.gz
MZW20791_0133.6.1_G0067_1_OraM1_S1_L001_R2_001.fastq.gz	G0067.1.OraM1.S1	G0067-1-OraM1	AAMP77	AAMP77-1-OraM1	MZW20791_0133.6.1_OraM1_S1_L001_R2_001.fastq.gz
MZW20791_0133.8.1_G0067_1_RecM1_S1_L001_R1_001.fastq.gz	G0067.1.RecM1.S1	G0067-1-RecM1	AAMP77	AAMP77-1-RecM1	MZW20791_0133.8.1_RecM1_S1_L001_R1_001.fastq.gz
MZW20791_0133.8.1_G0067_1_RecM1_S1_L001_R2_001.fastq.gz	G0067.1.RecM1.S1	G0067-1-RecM1	AAMP77	AAMP77-1-RecM1	MZW20791_0133.8.1_RecM1_S1_L001_R2_001.fastq.gz
MZW20791_0134.2.1_G0067_2_VagM1_S1_L001_R1_001.fastq.gz	G0067.2.VagM1.S1	G0067-2-VagM1	AAMP77	AAMP77-2-VagM1	MZW20791_0134.2.1_VagM1_S1_L001_R1_001.fastq.gz
MZW20791_0134.2.1_G0067_2_VagM1_S1_L001_R2_001.fastq.gz	G0067.2.VagM1.S1	G0067-2-VagM1	AAMP77	AAMP77-2-VagM1	MZW20791_0134.2.1_VagM1_S1_L001_R2_001.fastq.gz
MZW20791_0134.6.1_G0067_2_OraM1_S1_L001_R1_001.fastq.gz	G0067.2.OraM1.S1	G0067-2-OraM1	AAMP77	AAMP77-2-OraM1	MZW20791_0134.6.1_OraM1_S1_L001_R1_001.fastq.gz
MZW20791_0134.6.1_G0067_2_OraM1_S1_L001_R2_001.fastq.gz	G0067.2.OraM1.S1	G0067-2-OraM1	AAMP77	AAMP77-2-OraM1	MZW20791_0134.6.1_OraM1_S1_L001_R2_001.fastq.gz
MZW20791_0134.8.1_G0067_2_RecM1_S1_L001_R1_001.fastq.gz	G0067.2.RecM1.S1	G0067-2-RecM1	AAMP77	AAMP77-2-RecM1	MZW20791_0134.8.1_RecM1_S1_L001_R1_001.fastq.gz
MZW20791_0134.8.1_G0067_2_RecM1_S1_L001_R2_001.fastq.gz	G0067.2.RecM1.S1	G0067-2-RecM1	AAMP77	AAMP77-2-RecM1	MZW20791_0134.8.1_RecM1_S1_L001_R2_001.fastq.gz
MZW20791_0135.2.1_G0068_1_VagM1_S1_L001_R1_001.fastq.gz	G0068.1.VagM1.S1	G0068-1-VagM1	AAMP78	AAMP78-1-VagM1	MZW20791_0135.2.1_VagM1_S1_L001_R1_001.fastq.gz
MZW20791_0135.2.1_G0068_1_VagM1_S1_L001_R2_001.fastq.gz	G0068.1.VagM1.S1	G0068-1-VagM1	AAMP78	AAMP78-1-VagM1	MZW20791_0135.2.1_VagM1_S1_L001_R2_001.fastq.gz
MZW20791_0135.6.1_G0068_1_OraM1_S1_L001_R1_001.fastq.gz	G0068.1.OraM1.S1	G0068-1-OraM1	AAMP78	AAMP78-1-OraM1	MZW20791_0135.6.1_OraM1_S1_L001_R1_001.fastq.gz
MZW20791_0135.6.1_G0068_1_OraM1_S1_L001_R2_001.fastq.gz	G0068.1.OraM1.S1	G0068-1-OraM1	AAMP78	AAMP78-1-OraM1	MZW20791_0135.6.1_OraM1_S1_L001_R2_001.fastq.gz
MZW20791_0135.8.1_G0068_1_RecM1_S1_L001_R1_001.fastq.gz	G0068.1.RecM1.S1	G0068-1-RecM1	AAMP78	AAMP78-1-RecM1	MZW20791_0135.8.1_RecM1_S1_L001_R1_001.fastq.gz
MZW20791_0135.8.1_G0068_1_RecM1_S1_L001_R2_001.fastq.gz	G0068.1.RecM1.S1	G0068-1-RecM1	AAMP78	AAMP78-1-RecM1	MZW20791_0135.8.1_RecM1_S1_L001_R2_001.fastq.gz
MZW20791_0136.2.1_G0068_2_VagM1_S1_L001_R1_001.fastq.gz	G0068.2.VagM1.S1	G0068-2-VagM1	AAMP78	AAMP78-2-VagM1	MZW20791_0136.2.1_VagM1_S1_L001_R1_001.fastq.gz
MZW20791_0136.2.1_G0068_2_VagM1_S1_L001_R2_001.fastq.gz	G0068.2.VagM1.S1	G0068-2-VagM1	AAMP78	AAMP78-2-VagM1	MZW20791_0136.2.1_VagM1_S1_L001_R2_001.fastq.gz
MZW20791_0136.6.1_G0068_2_OraM1_S1_L001_R1_001.fastq.gz	G0068.2.OraM1.S1	G0068-2-OraM1	AAMP78	AAMP78-2-OraM1	MZW20791_0136.6.1_OraM1_S1_L001_R1_001.fastq.gz
MZW20791_0136.6.1_G0068_2_OraM1_S1_L001_R2_001.fastq.gz	G0068.2.OraM1.S1	G0068-2-OraM1	AAMP78	AAMP78-2-OraM1	MZW20791_0136.6.1_OraM1_S1_L001_R2_001.fastq.gz
MZW20791_0136.8.1_G0068_2_RecM1_S1_L001_R1_001.fastq.gz	G0068.2.RecM1.S1	G0068-2-RecM1	AAMP78	AAMP78-2-RecM1	MZW20791_0136.8.1_RecM1_S1_L001_R1_001.fastq.gz
MZW20791_0136.8.1_G0068_2_RecM1_S1_L001_R2_001.fastq.gz	G0068.2.RecM1.S1	G0068-2-RecM1	AAMP78	AAMP78-2-RecM1	MZW20791_0136.8.1_RecM1_S1_L001_R2_001.fastq.gz
MZW20791_0139.2.1_G0070_1_VagM1_S1_L001_R1_001.fastq.gz	G0070.1.VagM1.S1	G0070-1-VagM1	AAMP79	AAMP79-1-VagM1	MZW20791_0139.2.1_VagM1_S1_L001_R1_001.fastq.gz
MZW20791_0139.2.1_G0070_1_VagM1_S1_L001_R2_001.fastq.gz	G0070.1.VagM1.S1	G0070-1-VagM1	AAMP79	AAMP79-1-VagM1	MZW20791_0139.2.1_VagM1_S1_L001_R2_001.fastq.gz
MZW20791_0139.6.1_G0070_1_OraM1_S1_L001_R1_001.fastq.gz	G0070.1.OraM1.S1	G0070-1-OraM1	AAMP79	AAMP79-1-OraM1	MZW20791_0139.6.1_OraM1_S1_L001_R1_001.fastq.gz
MZW20791_0139.6.1_G0070_1_OraM1_S1_L001_R2_001.fastq.gz	G0070.1.OraM1.S1	G0070-1-OraM1	AAMP79	AAMP79-1-OraM1	MZW20791_0139.6.1_OraM1_S1_L001_R2_001.fastq.gz
MZW20791_0140.2.1_G0070_2_VagM1_S1_L001_R1_001.fastq.gz	G0070.2.VagM1.S1	G0070-2-VagM1	AAMP79	AAMP79-2-VagM1	MZW20791_0140.2.1_VagM1_S1_L001_R1_001.fastq.gz
MZW20791_0140.2.1_G0070_2_VagM1_S1_L001_R2_001.fastq.gz	G0070.2.VagM1.S1	G0070-2-VagM1	AAMP79	AAMP79-2-VagM1	MZW20791_0140.2.1_VagM1_S1_L001_R2_001.fastq.gz
MZW20791_0140.6.1_G0070_2_OraM1_S1_L001_R1_001.fastq.gz	G0070.2.OraM1.S1	G0070-2-OraM1	AAMP79	AAMP79-2-OraM1	MZW20791_0140.6.1_OraM1_S1_L001_R1_001.fastq.gz
MZW20791_0140.6.1_G0070_2_OraM1_S1_L001_R2_001.fastq.gz	G0070.2.OraM1.S1	G0070-2-OraM1	AAMP79	AAMP79-2-OraM1	MZW20791_0140.6.1_OraM1_S1_L001_R2_001.fastq.gz
MZW20791_0141.2.1_G0071_1_VagM1_S1_L001_R1_001.fastq.gz	G0071.1.VagM1.S1	G0071-1-VagM1	AAMP80	AAMP80-1-VagM1	MZW20791_0141.2.1_VagM1_S1_L001_R1_001.fastq.gz
MZW20791_0141.2.1_G0071_1_VagM1_S1_L001_R2_001.fastq.gz	G0071.1.VagM1.S1	G0071-1-VagM1	AAMP80	AAMP80-1-VagM1	MZW20791_0141.2.1_VagM1_S1_L001_R2_001.fastq.gz
MZW20791_0141.6.1_G0071_1_OraM1_S1_L001_R1_001.fastq.gz	G0071.1.OraM1.S1	G0071-1-OraM1	AAMP80	AAMP80-1-OraM1	MZW20791_0141.6.1_OraM1_S1_L001_R1_001.fastq.gz
MZW20791_0141.6.1_G0071_1_OraM1_S1_L001_R2_001.fastq.gz	G0071.1.OraM1.S1	G0071-1-OraM1	AAMP80	AAMP80-1-OraM1	MZW20791_0141.6.1_OraM1_S1_L001_R2_001.fastq.gz
MZW20791_0142.2.1_G0071_2_VagM1_S1_L001_R1_001.fastq.gz	G0071.2.VagM1.S1	G0071-2-VagM1	AAMP80	AAMP80-2-VagM1	MZW20791_0142.2.1_VagM1_S1_L001_R1_001.fastq.gz
MZW20791_0142.2.1_G0071_2_VagM1_S1_L001_R2_001.fastq.gz	G0071.2.VagM1.S1	G0071-2-VagM1	AAMP80	AAMP80-2-VagM1	MZW20791_0142.2.1_VagM1_S1_L001_R2_001.fastq.gz
MZW20791_0142.6.1_G0071_2_OraM1_S1_L001_R1_001.fastq.gz	G0071.2.OraM1.S1	G0071-2-OraM1	AAMP80	AAMP80-2-OraM1	MZW20791_0142.6.1_OraM1_S1_L001_R1_001.fastq.gz
MZW20791_0142.6.1_G0071_2_OraM1_S1_L001_R2_001.fastq.gz	G0071.2.OraM1.S1	G0071-2-OraM1	AAMP80	AAMP80-2-OraM1	MZW20791_0142.6.1_OraM1_S1_L001_R2_001.fastq.gz
MZW20791_0143.2.1_G0072_1_VagM1_S13_L001_R1_001.fastq.gz	G0072.1.VagM1.S13	G0072-1-VagM1	AAMP81	AAMP81-1-VagM1	MZW20791_0143.2.1_VagM1_S13_L001_R1_001.fastq.gz
MZW20791_0143.2.1_G0072_1_VagM1_S13_L001_R2_001.fastq.gz	G0072.1.VagM1.S13	G0072-1-VagM1	AAMP81	AAMP81-1-VagM1	MZW20791_0143.2.1_VagM1_S13_L001_R2_001.fastq.gz
MZW20791_0143.6.1_G0072_1_OraM1_S1_L001_R1_001.fastq.gz	G0072.1.OraM1.S1	G0072-1-OraM1	AAMP81	AAMP81-1-OraM1	MZW20791_0143.6.1_OraM1_S1_L001_R1_001.fastq.gz
MZW20791_0143.6.1_G0072_1_OraM1_S1_L001_R2_001.fastq.gz	G0072.1.OraM1.S1	G0072-1-OraM1	AAMP81	AAMP81-1-OraM1	MZW20791_0143.6.1_OraM1_S1_L001_R2_001.fastq.gz
MZW20791_0144.2.1_G0072_2_VagM1_S49_L001_R1_001.fastq.gz	G0072.2.VagM1.S49	G0072-2-VagM1	AAMP81	AAMP81-2-VagM1	MZW20791_0144.2.1_VagM1_S49_L001_R1_001.fastq.gz
MZW20791_0144.2.1_G0072_2_VagM1_S49_L001_R2_001.fastq.gz	G0072.2.VagM1.S49	G0072-2-VagM1	AAMP81	AAMP81-2-VagM1	MZW20791_0144.2.1_VagM1_S49_L001_R2_001.fastq.gz
MZW20791_0144.6.1_G0072_2_OraM1_S37_L001_R1_001.fastq.gz	G0072.2.OraM1.S37	G0072-2-OraM1	AAMP81	AAMP81-2-OraM1	MZW20791_0144.6.1_OraM1_S37_L001_R1_001.fastq.gz
MZW20791_0144.6.1_G0072_2_OraM1_S37_L001_R2_001.fastq.gz	G0072.2.OraM1.S37	G0072-2-OraM1	AAMP81	AAMP81-2-OraM1	MZW20791_0144.6.1_OraM1_S37_L001_R2_001.fastq.gz
MZW20791_0145.2.1_G0073_1_VagM1_S85_L001_R1_001.fastq.gz	G0073.1.VagM1.S85	G0073-1-VagM1	AAMP82	AAMP82-1-VagM1	MZW20791_0145.2.1_VagM1_S85_L001_R1_001.fastq.gz
MZW20791_0145.2.1_G0073_1_VagM1_S85_L001_R2_001.fastq.gz	G0073.1.VagM1.S85	G0073-1-VagM1	AAMP82	AAMP82-1-VagM1	MZW20791_0145.2.1_VagM1_S85_L001_R2_001.fastq.gz
MZW20791_0145.6.1_G0073_1_OraM1_S73_L001_R1_001.fastq.gz	G0073.1.OraM1.S73	G0073-1-OraM1	AAMP82	AAMP82-1-OraM1	MZW20791_0145.6.1_OraM1_S73_L001_R1_001.fastq.gz
MZW20791_0145.6.1_G0073_1_OraM1_S73_L001_R2_001.fastq.gz	G0073.1.OraM1.S73	G0073-1-OraM1	AAMP82	AAMP82-1-OraM1	MZW20791_0145.6.1_OraM1_S73_L001_R2_001.fastq.gz
MZW20791_0145.8.1_G0073_1_RecM1_S2_L001_R1_001.fastq.gz	G0073.1.RecM1.S2	G0073-1-RecM1	AAMP82	AAMP82-1-RecM1	MZW20791_0145.8.1_RecM1_S2_L001_R1_001.fastq.gz
MZW20791_0145.8.1_G0073_1_RecM1_S2_L001_R2_001.fastq.gz	G0073.1.RecM1.S2	G0073-1-RecM1	AAMP82	AAMP82-1-RecM1	MZW20791_0145.8.1_RecM1_S2_L001_R2_001.fastq.gz
MZW20791_0146.2.1_G0073_2_VagM1_S26_L001_R1_001.fastq.gz	G0073.2.VagM1.S26	G0073-2-VagM1	AAMP82	AAMP82-2-VagM1	MZW20791_0146.2.1_VagM1_S26_L001_R1_001.fastq.gz
MZW20791_0146.2.1_G0073_2_VagM1_S26_L001_R2_001.fastq.gz	G0073.2.VagM1.S26	G0073-2-VagM1	AAMP82	AAMP82-2-VagM1	MZW20791_0146.2.1_VagM1_S26_L001_R2_001.fastq.gz
MZW20791_0146.6.1_G0073_2_OraM1_S14_L001_R1_001.fastq.gz	G0073.2.OraM1.S14	G0073-2-OraM1	AAMP82	AAMP82-2-OraM1	MZW20791_0146.6.1_OraM1_S14_L001_R1_001.fastq.gz
MZW20791_0146.6.1_G0073_2_OraM1_S14_L001_R2_001.fastq.gz	G0073.2.OraM1.S14	G0073-2-OraM1	AAMP82	AAMP82-2-OraM1	MZW20791_0146.6.1_OraM1_S14_L001_R2_001.fastq.gz
MZW20791_0146.8.1_G0073_2_RecM1_S38_L001_R1_001.fastq.gz	G0073.2.RecM1.S38	G0073-2-RecM1	AAMP82	AAMP82-2-RecM1	MZW20791_0146.8.1_RecM1_S38_L001_R1_001.fastq.gz
MZW20791_0146.8.1_G0073_2_RecM1_S38_L001_R2_001.fastq.gz	G0073.2.RecM1.S38	G0073-2-RecM1	AAMP82	AAMP82-2-RecM1	MZW20791_0146.8.1_RecM1_S38_L001_R2_001.fastq.gz
MZW20791_0147.6.1_G0074_1_OraM1_S50_L001_R1_001.fastq.gz	G0074.1.OraM1.S50	G0074-1-OraM1	AAMP83	AAMP83-1-OraM1	MZW20791_0147.6.1_OraM1_S50_L001_R1_001.fastq.gz
MZW20791_0147.6.1_G0074_1_OraM1_S50_L001_R2_001.fastq.gz	G0074.1.OraM1.S50	G0074-1-OraM1	AAMP83	AAMP83-1-OraM1	MZW20791_0147.6.1_OraM1_S50_L001_R2_001.fastq.gz
MZW20791_0148.6.1_G0074_2_OraM1_S86_L001_R1_001.fastq.gz	G0074.2.OraM1.S86	G0074-2-OraM1	AAMP83	AAMP83-2-OraM1	MZW20791_0148.6.1_OraM1_S86_L001_R1_001.fastq.gz
MZW20791_0148.6.1_G0074_2_OraM1_S86_L001_R2_001.fastq.gz	G0074.2.OraM1.S86	G0074-2-OraM1	AAMP83	AAMP83-2-OraM1	MZW20791_0148.6.1_OraM1_S86_L001_R2_001.fastq.gz
MZW20791_0151.2.1_G0076_1_VagM1_S16_L001_R1_001.fastq.gz	G0076.1.VagM1.S16	G0076-1-VagM1	AAMP84	AAMP84-1-VagM1	MZW20791_0151.2.1_VagM1_S16_L001_R1_001.fastq.gz
MZW20791_0151.2.1_G0076_1_VagM1_S16_L001_R2_001.fastq.gz	G0076.1.VagM1.S16	G0076-1-VagM1	AAMP84	AAMP84-1-VagM1	MZW20791_0151.2.1_VagM1_S16_L001_R2_001.fastq.gz
MZW20791_0151.8.1_G0076_1_RecM1_S28_L001_R1_001.fastq.gz	G0076.1.RecM1.S28	G0076-1-RecM1	AAMP84	AAMP84-1-RecM1	MZW20791_0151.8.1_RecM1_S28_L001_R1_001.fastq.gz
MZW20791_0151.8.1_G0076_1_RecM1_S28_L001_R2_001.fastq.gz	G0076.1.RecM1.S28	G0076-1-RecM1	AAMP84	AAMP84-1-RecM1	MZW20791_0151.8.1_RecM1_S28_L001_R2_001.fastq.gz
MZW20791_0152.2.1_G0076_2_VagM1_S52_L001_R1_001.fastq.gz	G0076.2.VagM1.S52	G0076-2-VagM1	AAMP84	AAMP84-2-VagM1	MZW20791_0152.2.1_VagM1_S52_L001_R1_001.fastq.gz
MZW20791_0152.2.1_G0076_2_VagM1_S52_L001_R2_001.fastq.gz	G0076.2.VagM1.S52	G0076-2-VagM1	AAMP84	AAMP84-2-VagM1	MZW20791_0152.2.1_VagM1_S52_L001_R2_001.fastq.gz
MZW20791_0152.8.1_G0076_2_RecM1_S64_L001_R1_001.fastq.gz	G0076.2.RecM1.S64	G0076-2-RecM1	AAMP84	AAMP84-2-RecM1	MZW20791_0152.8.1_RecM1_S64_L001_R1_001.fastq.gz
MZW20791_0152.8.1_G0076_2_RecM1_S64_L001_R2_001.fastq.gz	G0076.2.RecM1.S64	G0076-2-RecM1	AAMP84	AAMP84-2-RecM1	MZW20791_0152.8.1_RecM1_S64_L001_R2_001.fastq.gz
MZW20791_0153.2.1_G0077_1_VagM1_S88_L001_R1_001.fastq.gz	G0077.1.VagM1.S88	G0077-1-VagM1	AAMP85	AAMP85-1-VagM1	MZW20791_0153.2.1_VagM1_S88_L001_R1_001.fastq.gz
MZW20791_0153.2.1_G0077_1_VagM1_S88_L001_R2_001.fastq.gz	G0077.1.VagM1.S88	G0077-1-VagM1	AAMP85	AAMP85-1-VagM1	MZW20791_0153.2.1_VagM1_S88_L001_R2_001.fastq.gz
MZW20791_0153.8.1_G0077_1_RecM1_S5_L001_R1_001.fastq.gz	G0077.1.RecM1.S5	G0077-1-RecM1	AAMP85	AAMP85-1-RecM1	MZW20791_0153.8.1_RecM1_S5_L001_R1_001.fastq.gz
MZW20791_0153.8.1_G0077_1_RecM1_S5_L001_R2_001.fastq.gz	G0077.1.RecM1.S5	G0077-1-RecM1	AAMP85	AAMP85-1-RecM1	MZW20791_0153.8.1_RecM1_S5_L001_R2_001.fastq.gz
MZW20791_0154.2.1_G0077_2_VagM1_S29_L001_R1_001.fastq.gz	G0077.2.VagM1.S29	G0077-2-VagM1	AAMP85	AAMP85-2-VagM1	MZW20791_0154.2.1_VagM1_S29_L001_R1_001.fastq.gz
MZW20791_0154.2.1_G0077_2_VagM1_S29_L001_R2_001.fastq.gz	G0077.2.VagM1.S29	G0077-2-VagM1	AAMP85	AAMP85-2-VagM1	MZW20791_0154.2.1_VagM1_S29_L001_R2_001.fastq.gz
MZW20791_0154.8.1_G0077_2_RecM1_S41_L001_R1_001.fastq.gz	G0077.2.RecM1.S41	G0077-2-RecM1	AAMP85	AAMP85-2-RecM1	MZW20791_0154.8.1_RecM1_S41_L001_R1_001.fastq.gz
MZW20791_0154.8.1_G0077_2_RecM1_S41_L001_R2_001.fastq.gz	G0077.2.RecM1.S41	G0077-2-RecM1	AAMP85	AAMP85-2-RecM1	MZW20791_0154.8.1_RecM1_S41_L001_R2_001.fastq.gz
MZW20791_0155.2.1_G0078_1_VagM1_S65_L001_R1_001.fastq.gz	G0078.1.VagM1.S65	G0078-1-VagM1	AAMP86	AAMP86-1-VagM1	MZW20791_0155.2.1_VagM1_S65_L001_R1_001.fastq.gz
MZW20791_0155.2.1_G0078_1_VagM1_S65_L001_R2_001.fastq.gz	G0078.1.VagM1.S65	G0078-1-VagM1	AAMP86	AAMP86-1-VagM1	MZW20791_0155.2.1_VagM1_S65_L001_R2_001.fastq.gz
MZW20791_0155.6.1_G0078_1_OraM1_S53_L001_R1_001.fastq.gz	G0078.1.OraM1.S53	G0078-1-OraM1	AAMP86	AAMP86-1-OraM1	MZW20791_0155.6.1_OraM1_S53_L001_R1_001.fastq.gz
MZW20791_0155.6.1_G0078_1_OraM1_S53_L001_R2_001.fastq.gz	G0078.1.OraM1.S53	G0078-1-OraM1	AAMP86	AAMP86-1-OraM1	MZW20791_0155.6.1_OraM1_S53_L001_R2_001.fastq.gz
MZW20791_0155.8.1_G0078_1_RecM1_S77_L001_R1_001.fastq.gz	G0078.1.RecM1.S77	G0078-1-RecM1	AAMP86	AAMP86-1-RecM1	MZW20791_0155.8.1_RecM1_S77_L001_R1_001.fastq.gz
MZW20791_0155.8.1_G0078_1_RecM1_S77_L001_R2_001.fastq.gz	G0078.1.RecM1.S77	G0078-1-RecM1	AAMP86	AAMP86-1-RecM1	MZW20791_0155.8.1_RecM1_S77_L001_R2_001.fastq.gz
MZW20791_0156.2.1_G0078_2_VagM1_S6_L001_R1_001.fastq.gz	G0078.2.VagM1.S6	G0078-2-VagM1	AAMP86	AAMP86-2-VagM1	MZW20791_0156.2.1_VagM1_S6_L001_R1_001.fastq.gz
MZW20791_0156.2.1_G0078_2_VagM1_S6_L001_R2_001.fastq.gz	G0078.2.VagM1.S6	G0078-2-VagM1	AAMP86	AAMP86-2-VagM1	MZW20791_0156.2.1_VagM1_S6_L001_R2_001.fastq.gz
MZW20791_0156.6.1_G0078_2_OraM1_S89_L001_R1_001.fastq.gz	G0078.2.OraM1.S89	G0078-2-OraM1	AAMP86	AAMP86-2-OraM1	MZW20791_0156.6.1_OraM1_S89_L001_R1_001.fastq.gz
MZW20791_0156.6.1_G0078_2_OraM1_S89_L001_R2_001.fastq.gz	G0078.2.OraM1.S89	G0078-2-OraM1	AAMP86	AAMP86-2-OraM1	MZW20791_0156.6.1_OraM1_S89_L001_R2_001.fastq.gz
MZW20791_0156.8.1_G0078_2_RecM1_S18_L001_R1_001.fastq.gz	G0078.2.RecM1.S18	G0078-2-RecM1	AAMP86	AAMP86-2-RecM1	MZW20791_0156.8.1_RecM1_S18_L001_R1_001.fastq.gz
MZW20791_0156.8.1_G0078_2_RecM1_S18_L001_R2_001.fastq.gz	G0078.2.RecM1.S18	G0078-2-RecM1	AAMP86	AAMP86-2-RecM1	MZW20791_0156.8.1_RecM1_S18_L001_R2_001.fastq.gz
MZW20791_0157.2.1_G0079_1_VagM1_S42_L001_R1_001.fastq.gz	G0079.1.VagM1.S42	G0079-1-VagM1	AAMP87	AAMP87-1-VagM1	MZW20791_0157.2.1_VagM1_S42_L001_R1_001.fastq.gz
MZW20791_0157.2.1_G0079_1_VagM1_S42_L001_R2_001.fastq.gz	G0079.1.VagM1.S42	G0079-1-VagM1	AAMP87	AAMP87-1-VagM1	MZW20791_0157.2.1_VagM1_S42_L001_R2_001.fastq.gz
MZW20791_0157.6.1_G0079_1_OraM1_S30_L001_R1_001.fastq.gz	G0079.1.OraM1.S30	G0079-1-OraM1	AAMP87	AAMP87-1-OraM1	MZW20791_0157.6.1_OraM1_S30_L001_R1_001.fastq.gz
MZW20791_0157.6.1_G0079_1_OraM1_S30_L001_R2_001.fastq.gz	G0079.1.OraM1.S30	G0079-1-OraM1	AAMP87	AAMP87-1-OraM1	MZW20791_0157.6.1_OraM1_S30_L001_R2_001.fastq.gz
MZW20791_0157.8.1_G0079_1_RecM1_S54_L001_R1_001.fastq.gz	G0079.1.RecM1.S54	G0079-1-RecM1	AAMP87	AAMP87-1-RecM1	MZW20791_0157.8.1_RecM1_S54_L001_R1_001.fastq.gz
MZW20791_0157.8.1_G0079_1_RecM1_S54_L001_R2_001.fastq.gz	G0079.1.RecM1.S54	G0079-1-RecM1	AAMP87	AAMP87-1-RecM1	MZW20791_0157.8.1_RecM1_S54_L001_R2_001.fastq.gz
MZW20791_0158.2.1_G0079_2_VagM1_S19_L001_R1_001.fastq.gz	G0079.2.VagM1.S19	G0079-2-VagM1	AAMP87	AAMP87-2-VagM1	MZW20791_0158.2.1_VagM1_S19_L001_R1_001.fastq.gz
MZW20791_0158.2.1_G0079_2_VagM1_S19_L001_R2_001.fastq.gz	G0079.2.VagM1.S19	G0079-2-VagM1	AAMP87	AAMP87-2-VagM1	MZW20791_0158.2.1_VagM1_S19_L001_R2_001.fastq.gz
MZW20791_0158.6.1_G0079_2_OraM1_S7_L001_R1_001.fastq.gz	G0079.2.OraM1.S7	G0079-2-OraM1	AAMP87	AAMP87-2-OraM1	MZW20791_0158.6.1_OraM1_S7_L001_R1_001.fastq.gz
MZW20791_0158.6.1_G0079_2_OraM1_S7_L001_R2_001.fastq.gz	G0079.2.OraM1.S7	G0079-2-OraM1	AAMP87	AAMP87-2-OraM1	MZW20791_0158.6.1_OraM1_S7_L001_R2_001.fastq.gz
MZW20791_0158.8.1_G0079_2_RecM1_S31_L001_R1_001.fastq.gz	G0079.2.RecM1.S31	G0079-2-RecM1	AAMP87	AAMP87-2-RecM1	MZW20791_0158.8.1_RecM1_S31_L001_R1_001.fastq.gz
MZW20791_0158.8.1_G0079_2_RecM1_S31_L001_R2_001.fastq.gz	G0079.2.RecM1.S31	G0079-2-RecM1	AAMP87	AAMP87-2-RecM1	MZW20791_0158.8.1_RecM1_S31_L001_R2_001.fastq.gz
MZW20791_0159.2.1_G0080_1_VagM1_S55_L001_R1_001.fastq.gz	G0080.1.VagM1.S55	G0080-1-VagM1	AAMP88	AAMP88-1-VagM1	MZW20791_0159.2.1_VagM1_S55_L001_R1_001.fastq.gz
MZW20791_0159.2.1_G0080_1_VagM1_S55_L001_R2_001.fastq.gz	G0080.1.VagM1.S55	G0080-1-VagM1	AAMP88	AAMP88-1-VagM1	MZW20791_0159.2.1_VagM1_S55_L001_R2_001.fastq.gz
MZW20791_0159.8.1_G0080_1_RecM1_S67_L001_R1_001.fastq.gz	G0080.1.RecM1.S67	G0080-1-RecM1	AAMP88	AAMP88-1-RecM1	MZW20791_0159.8.1_RecM1_S67_L001_R1_001.fastq.gz
MZW20791_0159.8.1_G0080_1_RecM1_S67_L001_R2_001.fastq.gz	G0080.1.RecM1.S67	G0080-1-RecM1	AAMP88	AAMP88-1-RecM1	MZW20791_0159.8.1_RecM1_S67_L001_R2_001.fastq.gz
MZW20791_0160.2.1_G0080_2_VagM1_S91_L001_R1_001.fastq.gz	G0080.2.VagM1.S91	G0080-2-VagM1	AAMP88	AAMP88-2-VagM1	MZW20791_0160.2.1_VagM1_S91_L001_R1_001.fastq.gz
MZW20791_0160.2.1_G0080_2_VagM1_S91_L001_R2_001.fastq.gz	G0080.2.VagM1.S91	G0080-2-VagM1	AAMP88	AAMP88-2-VagM1	MZW20791_0160.2.1_VagM1_S91_L001_R2_001.fastq.gz
MZW20791_0160.8.1_G0080_2_RecM1_S8_L001_R1_001.fastq.gz	G0080.2.RecM1.S8	G0080-2-RecM1	AAMP88	AAMP88-2-RecM1	MZW20791_0160.8.1_RecM1_S8_L001_R1_001.fastq.gz
MZW20791_0160.8.1_G0080_2_RecM1_S8_L001_R2_001.fastq.gz	G0080.2.RecM1.S8	G0080-2-RecM1	AAMP88	AAMP88-2-RecM1	MZW20791_0160.8.1_RecM1_S8_L001_R2_001.fastq.gz
MZW20791_0161.2.1_G0081_1_VagM1_S32_L001_R1_001.fastq.gz	G0081.1.VagM1.S32	G0081-1-VagM1	AAMP89	AAMP89-1-VagM1	MZW20791_0161.2.1_VagM1_S32_L001_R1_001.fastq.gz
MZW20791_0161.2.1_G0081_1_VagM1_S32_L001_R2_001.fastq.gz	G0081.1.VagM1.S32	G0081-1-VagM1	AAMP89	AAMP89-1-VagM1	MZW20791_0161.2.1_VagM1_S32_L001_R2_001.fastq.gz
MZW20791_0161.6.1_G0081_1_OraM1_S20_L001_R1_001.fastq.gz	G0081.1.OraM1.S20	G0081-1-OraM1	AAMP89	AAMP89-1-OraM1	MZW20791_0161.6.1_OraM1_S20_L001_R1_001.fastq.gz
MZW20791_0161.6.1_G0081_1_OraM1_S20_L001_R2_001.fastq.gz	G0081.1.OraM1.S20	G0081-1-OraM1	AAMP89	AAMP89-1-OraM1	MZW20791_0161.6.1_OraM1_S20_L001_R2_001.fastq.gz
MZW20791_0161.8.1_G0081_1_RecM1_S44_L001_R1_001.fastq.gz	G0081.1.RecM1.S44	G0081-1-RecM1	AAMP89	AAMP89-1-RecM1	MZW20791_0161.8.1_RecM1_S44_L001_R1_001.fastq.gz
MZW20791_0161.8.1_G0081_1_RecM1_S44_L001_R2_001.fastq.gz	G0081.1.RecM1.S44	G0081-1-RecM1	AAMP89	AAMP89-1-RecM1	MZW20791_0161.8.1_RecM1_S44_L001_R2_001.fastq.gz
MZW20791_0162.2.1_G0081_2_VagM1_S68_L001_R1_001.fastq.gz	G0081.2.VagM1.S68	G0081-2-VagM1	AAMP89	AAMP89-2-VagM1	MZW20791_0162.2.1_VagM1_S68_L001_R1_001.fastq.gz
MZW20791_0162.2.1_G0081_2_VagM1_S68_L001_R2_001.fastq.gz	G0081.2.VagM1.S68	G0081-2-VagM1	AAMP89	AAMP89-2-VagM1	MZW20791_0162.2.1_VagM1_S68_L001_R2_001.fastq.gz
MZW20791_0162.6.1_G0081_2_OraM1_S56_L001_R1_001.fastq.gz	G0081.2.OraM1.S56	G0081-2-OraM1	AAMP89	AAMP89-2-OraM1	MZW20791_0162.6.1_OraM1_S56_L001_R1_001.fastq.gz
MZW20791_0162.6.1_G0081_2_OraM1_S56_L001_R2_001.fastq.gz	G0081.2.OraM1.S56	G0081-2-OraM1	AAMP89	AAMP89-2-OraM1	MZW20791_0162.6.1_OraM1_S56_L001_R2_001.fastq.gz
MZW20791_0162.8.1_G0081_2_RecM1_S80_L001_R1_001.fastq.gz	G0081.2.RecM1.S80	G0081-2-RecM1	AAMP89	AAMP89-2-RecM1	MZW20791_0162.8.1_RecM1_S80_L001_R1_001.fastq.gz
MZW20791_0162.8.1_G0081_2_RecM1_S80_L001_R2_001.fastq.gz	G0081.2.RecM1.S80	G0081-2-RecM1	AAMP89	AAMP89-2-RecM1	MZW20791_0162.8.1_RecM1_S80_L001_R2_001.fastq.gz
MZW20791_0165.2.1_G0083_1_VagM1_S45_L001_R1_001.fastq.gz	G0083.1.VagM1.S45	G0083-1-VagM1	AAMP90	AAMP90-1-VagM1	MZW20791_0165.2.1_VagM1_S45_L001_R1_001.fastq.gz
MZW20791_0165.2.1_G0083_1_VagM1_S45_L001_R2_001.fastq.gz	G0083.1.VagM1.S45	G0083-1-VagM1	AAMP90	AAMP90-1-VagM1	MZW20791_0165.2.1_VagM1_S45_L001_R2_001.fastq.gz
MZW20791_0165.8.1_G0083_1_RecM1_S57_L001_R1_001.fastq.gz	G0083.1.RecM1.S57	G0083-1-RecM1	AAMP90	AAMP90-1-RecM1	MZW20791_0165.8.1_RecM1_S57_L001_R1_001.fastq.gz
MZW20791_0165.8.1_G0083_1_RecM1_S57_L001_R2_001.fastq.gz	G0083.1.RecM1.S57	G0083-1-RecM1	AAMP90	AAMP90-1-RecM1	MZW20791_0165.8.1_RecM1_S57_L001_R2_001.fastq.gz
MZW20791_0166.2.1_G0083_2_VagM1_S22_L001_R1_001.fastq.gz	G0083.2.VagM1.S22	G0083-2-VagM1	AAMP90	AAMP90-2-VagM1	MZW20791_0166.2.1_VagM1_S22_L001_R1_001.fastq.gz
MZW20791_0166.2.1_G0083_2_VagM1_S22_L001_R2_001.fastq.gz	G0083.2.VagM1.S22	G0083-2-VagM1	AAMP90	AAMP90-2-VagM1	MZW20791_0166.2.1_VagM1_S22_L001_R2_001.fastq.gz
MZW20791_0166.8.1_G0083_2_RecM1_S34_L001_R1_001.fastq.gz	G0083.2.RecM1.S34	G0083-2-RecM1	AAMP90	AAMP90-2-RecM1	MZW20791_0166.8.1_RecM1_S34_L001_R1_001.fastq.gz
MZW20791_0166.8.1_G0083_2_RecM1_S34_L001_R2_001.fastq.gz	G0083.2.RecM1.S34	G0083-2-RecM1	AAMP90	AAMP90-2-RecM1	MZW20791_0166.8.1_RecM1_S34_L001_R2_001.fastq.gz
MZW20791_0167.2.1_G0084_1_VagM1_S58_L001_R1_001.fastq.gz	G0084.1.VagM1.S58	G0084-1-VagM1	AAMP91	AAMP91-1-VagM1	MZW20791_0167.2.1_VagM1_S58_L001_R1_001.fastq.gz
MZW20791_0167.2.1_G0084_1_VagM1_S58_L001_R2_001.fastq.gz	G0084.1.VagM1.S58	G0084-1-VagM1	AAMP91	AAMP91-1-VagM1	MZW20791_0167.2.1_VagM1_S58_L001_R2_001.fastq.gz
MZW20791_0167.6.1_G0084_1_OraM1_S46_L001_R1_001.fastq.gz	G0084.1.OraM1.S46	G0084-1-OraM1	AAMP91	AAMP91-1-OraM1	MZW20791_0167.6.1_OraM1_S46_L001_R1_001.fastq.gz
MZW20791_0167.6.1_G0084_1_OraM1_S46_L001_R2_001.fastq.gz	G0084.1.OraM1.S46	G0084-1-OraM1	AAMP91	AAMP91-1-OraM1	MZW20791_0167.6.1_OraM1_S46_L001_R2_001.fastq.gz
MZW20791_0167.8.1_G0084_1_RecM1_S70_L001_R1_001.fastq.gz	G0084.1.RecM1.S70	G0084-1-RecM1	AAMP91	AAMP91-1-RecM1	MZW20791_0167.8.1_RecM1_S70_L001_R1_001.fastq.gz
MZW20791_0167.8.1_G0084_1_RecM1_S70_L001_R2_001.fastq.gz	G0084.1.RecM1.S70	G0084-1-RecM1	AAMP91	AAMP91-1-RecM1	MZW20791_0167.8.1_RecM1_S70_L001_R2_001.fastq.gz
MZW20791_0168.2.1_G0084_2_VagM1_S94_L001_R1_001.fastq.gz	G0084.2.VagM1.S94	G0084-2-VagM1	AAMP91	AAMP91-2-VagM1	MZW20791_0168.2.1_VagM1_S94_L001_R1_001.fastq.gz
MZW20791_0168.2.1_G0084_2_VagM1_S94_L001_R2_001.fastq.gz	G0084.2.VagM1.S94	G0084-2-VagM1	AAMP91	AAMP91-2-VagM1	MZW20791_0168.2.1_VagM1_S94_L001_R2_001.fastq.gz
MZW20791_0168.6.1_G0084_2_OraM1_S82_L001_R1_001.fastq.gz	G0084.2.OraM1.S82	G0084-2-OraM1	AAMP91	AAMP91-2-OraM1	MZW20791_0168.6.1_OraM1_S82_L001_R1_001.fastq.gz
MZW20791_0168.6.1_G0084_2_OraM1_S82_L001_R2_001.fastq.gz	G0084.2.OraM1.S82	G0084-2-OraM1	AAMP91	AAMP91-2-OraM1	MZW20791_0168.6.1_OraM1_S82_L001_R2_001.fastq.gz
MZW20791_0168.8.1_G0084_2_RecM1_S11_L001_R1_001.fastq.gz	G0084.2.RecM1.S11	G0084-2-RecM1	AAMP91	AAMP91-2-RecM1	MZW20791_0168.8.1_RecM1_S11_L001_R1_001.fastq.gz
MZW20791_0168.8.1_G0084_2_RecM1_S11_L001_R2_001.fastq.gz	G0084.2.RecM1.S11	G0084-2-RecM1	AAMP91	AAMP91-2-RecM1	MZW20791_0168.8.1_RecM1_S11_L001_R2_001.fastq.gz
MZW20791_0171.2.1_G0086_1_VagM1_S35_L001_R1_001.fastq.gz	G0086.1.VagM1.S35	G0086-1-VagM1	AAMP92	AAMP92-1-VagM1	MZW20791_0171.2.1_VagM1_S35_L001_R1_001.fastq.gz
MZW20791_0171.2.1_G0086_1_VagM1_S35_L001_R2_001.fastq.gz	G0086.1.VagM1.S35	G0086-1-VagM1	AAMP92	AAMP92-1-VagM1	MZW20791_0171.2.1_VagM1_S35_L001_R2_001.fastq.gz
MZW20791_0171.6.1_G0086_1_OraM1_S23_L001_R1_001.fastq.gz	G0086.1.OraM1.S23	G0086-1-OraM1	AAMP92	AAMP92-1-OraM1	MZW20791_0171.6.1_OraM1_S23_L001_R1_001.fastq.gz
MZW20791_0171.6.1_G0086_1_OraM1_S23_L001_R2_001.fastq.gz	G0086.1.OraM1.S23	G0086-1-OraM1	AAMP92	AAMP92-1-OraM1	MZW20791_0171.6.1_OraM1_S23_L001_R2_001.fastq.gz
MZW20791_0172.2.1_G0086_2_VagM1_S71_L001_R1_001.fastq.gz	G0086.2.VagM1.S71	G0086-2-VagM1	AAMP92	AAMP92-2-VagM1	MZW20791_0172.2.1_VagM1_S71_L001_R1_001.fastq.gz
MZW20791_0172.2.1_G0086_2_VagM1_S71_L001_R2_001.fastq.gz	G0086.2.VagM1.S71	G0086-2-VagM1	AAMP92	AAMP92-2-VagM1	MZW20791_0172.2.1_VagM1_S71_L001_R2_001.fastq.gz
MZW20791_0172.6.1_G0086_2_OraM1_S59_L001_R1_001.fastq.gz	G0086.2.OraM1.S59	G0086-2-OraM1	AAMP92	AAMP92-2-OraM1	MZW20791_0172.6.1_OraM1_S59_L001_R1_001.fastq.gz
MZW20791_0172.6.1_G0086_2_OraM1_S59_L001_R2_001.fastq.gz	G0086.2.OraM1.S59	G0086-2-OraM1	AAMP92	AAMP92-2-OraM1	MZW20791_0172.6.1_OraM1_S59_L001_R2_001.fastq.gz
MZW20791_0175.2.1_G0088_1_VagM1_S13_L001_R1_001.fastq.gz	G0088.1.VagM1.S13	G0088-1-VagM1	AAMP93	AAMP93-1-VagM1	MZW20791_0175.2.1_VagM1_S13_L001_R1_001.fastq.gz
MZW20791_0175.2.1_G0088_1_VagM1_S13_L001_R2_001.fastq.gz	G0088.1.VagM1.S13	G0088-1-VagM1	AAMP93	AAMP93-1-VagM1	MZW20791_0175.2.1_VagM1_S13_L001_R2_001.fastq.gz
MZW20791_0175.6.1_G0088_1_OraM1_S1_L001_R1_001.fastq.gz	G0088.1.OraM1.S1	G0088-1-OraM1	AAMP93	AAMP93-1-OraM1	MZW20791_0175.6.1_OraM1_S1_L001_R1_001.fastq.gz
MZW20791_0175.6.1_G0088_1_OraM1_S1_L001_R2_001.fastq.gz	G0088.1.OraM1.S1	G0088-1-OraM1	AAMP93	AAMP93-1-OraM1	MZW20791_0175.6.1_OraM1_S1_L001_R2_001.fastq.gz
MZW20791_0176.2.1_G0088_2_VagM1_S49_L001_R1_001.fastq.gz	G0088.2.VagM1.S49	G0088-2-VagM1	AAMP93	AAMP93-2-VagM1	MZW20791_0176.2.1_VagM1_S49_L001_R1_001.fastq.gz
MZW20791_0176.2.1_G0088_2_VagM1_S49_L001_R2_001.fastq.gz	G0088.2.VagM1.S49	G0088-2-VagM1	AAMP93	AAMP93-2-VagM1	MZW20791_0176.2.1_VagM1_S49_L001_R2_001.fastq.gz
MZW20791_0176.6.1_G0088_2_OraM1_S37_L001_R1_001.fastq.gz	G0088.2.OraM1.S37	G0088-2-OraM1	AAMP93	AAMP93-2-OraM1	MZW20791_0176.6.1_OraM1_S37_L001_R1_001.fastq.gz
MZW20791_0176.6.1_G0088_2_OraM1_S37_L001_R2_001.fastq.gz	G0088.2.OraM1.S37	G0088-2-OraM1	AAMP93	AAMP93-2-OraM1	MZW20791_0176.6.1_OraM1_S37_L001_R2_001.fastq.gz
MZW20791_0177.2.1_G0089_1_VagM1_S85_L001_R1_001.fastq.gz	G0089.1.VagM1.S85	G0089-1-VagM1	AAMP94	AAMP94-1-VagM1	MZW20791_0177.2.1_VagM1_S85_L001_R1_001.fastq.gz
MZW20791_0177.2.1_G0089_1_VagM1_S85_L001_R2_001.fastq.gz	G0089.1.VagM1.S85	G0089-1-VagM1	AAMP94	AAMP94-1-VagM1	MZW20791_0177.2.1_VagM1_S85_L001_R2_001.fastq.gz
MZW20791_0177.6.1_G0089_1_OraM1_S73_L001_R1_001.fastq.gz	G0089.1.OraM1.S73	G0089-1-OraM1	AAMP94	AAMP94-1-OraM1	MZW20791_0177.6.1_OraM1_S73_L001_R1_001.fastq.gz
MZW20791_0177.6.1_G0089_1_OraM1_S73_L001_R2_001.fastq.gz	G0089.1.OraM1.S73	G0089-1-OraM1	AAMP94	AAMP94-1-OraM1	MZW20791_0177.6.1_OraM1_S73_L001_R2_001.fastq.gz
MZW20791_0177.8.1_G0089_1_RecM1_S2_L001_R1_001.fastq.gz	G0089.1.RecM1.S2	G0089-1-RecM1	AAMP94	AAMP94-1-RecM1	MZW20791_0177.8.1_RecM1_S2_L001_R1_001.fastq.gz
MZW20791_0177.8.1_G0089_1_RecM1_S2_L001_R2_001.fastq.gz	G0089.1.RecM1.S2	G0089-1-RecM1	AAMP94	AAMP94-1-RecM1	MZW20791_0177.8.1_RecM1_S2_L001_R2_001.fastq.gz
MZW20791_0178.2.1_G0089_2_VagM1_S26_L001_R1_001.fastq.gz	G0089.2.VagM1.S26	G0089-2-VagM1	AAMP94	AAMP94-2-VagM1	MZW20791_0178.2.1_VagM1_S26_L001_R1_001.fastq.gz
MZW20791_0178.2.1_G0089_2_VagM1_S26_L001_R2_001.fastq.gz	G0089.2.VagM1.S26	G0089-2-VagM1	AAMP94	AAMP94-2-VagM1	MZW20791_0178.2.1_VagM1_S26_L001_R2_001.fastq.gz
MZW20791_0178.6.1_G0089_2_OraM1_S14_L001_R1_001.fastq.gz	G0089.2.OraM1.S14	G0089-2-OraM1	AAMP94	AAMP94-2-OraM1	MZW20791_0178.6.1_OraM1_S14_L001_R1_001.fastq.gz
MZW20791_0178.6.1_G0089_2_OraM1_S14_L001_R2_001.fastq.gz	G0089.2.OraM1.S14	G0089-2-OraM1	AAMP94	AAMP94-2-OraM1	MZW20791_0178.6.1_OraM1_S14_L001_R2_001.fastq.gz
MZW20791_0178.8.1_G0089_2_RecM1_S38_L001_R1_001.fastq.gz	G0089.2.RecM1.S38	G0089-2-RecM1	AAMP94	AAMP94-2-RecM1	MZW20791_0178.8.1_RecM1_S38_L001_R1_001.fastq.gz
MZW20791_0178.8.1_G0089_2_RecM1_S38_L001_R2_001.fastq.gz	G0089.2.RecM1.S38	G0089-2-RecM1	AAMP94	AAMP94-2-RecM1	MZW20791_0178.8.1_RecM1_S38_L001_R2_001.fastq.gz
MZW20791_0179.2.1_G0090_1_VagM1_S62_L001_R1_001.fastq.gz	G0090.1.VagM1.S62	G0090-1-VagM1	AAMP95	AAMP95-1-VagM1	MZW20791_0179.2.1_VagM1_S62_L001_R1_001.fastq.gz
MZW20791_0179.2.1_G0090_1_VagM1_S62_L001_R2_001.fastq.gz	G0090.1.VagM1.S62	G0090-1-VagM1	AAMP95	AAMP95-1-VagM1	MZW20791_0179.2.1_VagM1_S62_L001_R2_001.fastq.gz
MZW20791_0179.8.1_G0090_1_RecM1_S74_L001_R1_001.fastq.gz	G0090.1.RecM1.S74	G0090-1-RecM1	AAMP95	AAMP95-1-RecM1	MZW20791_0179.8.1_RecM1_S74_L001_R1_001.fastq.gz
MZW20791_0179.8.1_G0090_1_RecM1_S74_L001_R2_001.fastq.gz	G0090.1.RecM1.S74	G0090-1-RecM1	AAMP95	AAMP95-1-RecM1	MZW20791_0179.8.1_RecM1_S74_L001_R2_001.fastq.gz
MZW20791_0180.2.1_G0090_2_VagM1_S3_L001_R1_001.fastq.gz	G0090.2.VagM1.S3	G0090-2-VagM1	AAMP95	AAMP95-2-VagM1	MZW20791_0180.2.1_VagM1_S3_L001_R1_001.fastq.gz
MZW20791_0180.2.1_G0090_2_VagM1_S3_L001_R2_001.fastq.gz	G0090.2.VagM1.S3	G0090-2-VagM1	AAMP95	AAMP95-2-VagM1	MZW20791_0180.2.1_VagM1_S3_L001_R2_001.fastq.gz
MZW20791_0180.8.1_G0090_2_RecM1_S15_L001_R1_001.fastq.gz	G0090.2.RecM1.S15	G0090-2-RecM1	AAMP95	AAMP95-2-RecM1	MZW20791_0180.8.1_RecM1_S15_L001_R1_001.fastq.gz
MZW20791_0180.8.1_G0090_2_RecM1_S15_L001_R2_001.fastq.gz	G0090.2.RecM1.S15	G0090-2-RecM1	AAMP95	AAMP95-2-RecM1	MZW20791_0180.8.1_RecM1_S15_L001_R2_001.fastq.gz
MZW20791_0181.2.1_G0091_1_VagM1_S39_L001_R1_001.fastq.gz	G0091.1.VagM1.S39	G0091-1-VagM1	AAMP96	AAMP96-1-VagM1	MZW20791_0181.2.1_VagM1_S39_L001_R1_001.fastq.gz
MZW20791_0181.2.1_G0091_1_VagM1_S39_L001_R2_001.fastq.gz	G0091.1.VagM1.S39	G0091-1-VagM1	AAMP96	AAMP96-1-VagM1	MZW20791_0181.2.1_VagM1_S39_L001_R2_001.fastq.gz
MZW20791_0181.6.1_G0091_1_OraM1_S27_L001_R1_001.fastq.gz	G0091.1.OraM1.S27	G0091-1-OraM1	AAMP96	AAMP96-1-OraM1	MZW20791_0181.6.1_OraM1_S27_L001_R1_001.fastq.gz
MZW20791_0181.6.1_G0091_1_OraM1_S27_L001_R2_001.fastq.gz	G0091.1.OraM1.S27	G0091-1-OraM1	AAMP96	AAMP96-1-OraM1	MZW20791_0181.6.1_OraM1_S27_L001_R2_001.fastq.gz
MZW20791_0181.8.1_G0091_1_RecM1_S51_L001_R1_001.fastq.gz	G0091.1.RecM1.S51	G0091-1-RecM1	AAMP96	AAMP96-1-RecM1	MZW20791_0181.8.1_RecM1_S51_L001_R1_001.fastq.gz
MZW20791_0181.8.1_G0091_1_RecM1_S51_L001_R2_001.fastq.gz	G0091.1.RecM1.S51	G0091-1-RecM1	AAMP96	AAMP96-1-RecM1	MZW20791_0181.8.1_RecM1_S51_L001_R2_001.fastq.gz
MZW20791_0182.2.1_G0091_2_VagM1_S16_L001_R1_001.fastq.gz	G0091.2.VagM1.S16	G0091-2-VagM1	AAMP96	AAMP96-2-VagM1	MZW20791_0182.2.1_VagM1_S16_L001_R1_001.fastq.gz
MZW20791_0182.2.1_G0091_2_VagM1_S16_L001_R2_001.fastq.gz	G0091.2.VagM1.S16	G0091-2-VagM1	AAMP96	AAMP96-2-VagM1	MZW20791_0182.2.1_VagM1_S16_L001_R2_001.fastq.gz
MZW20791_0182.6.1_G0091_2_OraM1_S4_L001_R1_001.fastq.gz	G0091.2.OraM1.S4	G0091-2-OraM1	AAMP96	AAMP96-2-OraM1	MZW20791_0182.6.1_OraM1_S4_L001_R1_001.fastq.gz
MZW20791_0182.6.1_G0091_2_OraM1_S4_L001_R2_001.fastq.gz	G0091.2.OraM1.S4	G0091-2-OraM1	AAMP96	AAMP96-2-OraM1	MZW20791_0182.6.1_OraM1_S4_L001_R2_001.fastq.gz
MZW20791_0182.8.1_G0091_2_RecM1_S28_L001_R1_001.fastq.gz	G0091.2.RecM1.S28	G0091-2-RecM1	AAMP96	AAMP96-2-RecM1	MZW20791_0182.8.1_RecM1_S28_L001_R1_001.fastq.gz
MZW20791_0182.8.1_G0091_2_RecM1_S28_L001_R2_001.fastq.gz	G0091.2.RecM1.S28	G0091-2-RecM1	AAMP96	AAMP96-2-RecM1	MZW20791_0182.8.1_RecM1_S28_L001_R2_001.fastq.gz
MZW20791_0183.6.1_G0092_1_OraM1_S40_L001_R1_001.fastq.gz	G0092.1.OraM1.S40	G0092-1-OraM1	AAMP97	AAMP97-1-OraM1	MZW20791_0183.6.1_OraM1_S40_L001_R1_001.fastq.gz
MZW20791_0183.6.1_G0092_1_OraM1_S40_L001_R2_001.fastq.gz	G0092.1.OraM1.S40	G0092-1-OraM1	AAMP97	AAMP97-1-OraM1	MZW20791_0183.6.1_OraM1_S40_L001_R2_001.fastq.gz
MZW20791_0183.8.1_G0092_1_RecM1_S64_L001_R1_001.fastq.gz	G0092.1.RecM1.S64	G0092-1-RecM1	AAMP97	AAMP97-1-RecM1	MZW20791_0183.8.1_RecM1_S64_L001_R1_001.fastq.gz
MZW20791_0183.8.1_G0092_1_RecM1_S64_L001_R2_001.fastq.gz	G0092.1.RecM1.S64	G0092-1-RecM1	AAMP97	AAMP97-1-RecM1	MZW20791_0183.8.1_RecM1_S64_L001_R2_001.fastq.gz
MZW20791_0184.6.1_G0092_2_OraM1_S76_L001_R1_001.fastq.gz	G0092.2.OraM1.S76	G0092-2-OraM1	AAMP97	AAMP97-2-OraM1	MZW20791_0184.6.1_OraM1_S76_L001_R1_001.fastq.gz
MZW20791_0184.6.1_G0092_2_OraM1_S76_L001_R2_001.fastq.gz	G0092.2.OraM1.S76	G0092-2-OraM1	AAMP97	AAMP97-2-OraM1	MZW20791_0184.6.1_OraM1_S76_L001_R2_001.fastq.gz
MZW20791_0184.8.1_G0092_2_RecM1_S5_L001_R1_001.fastq.gz	G0092.2.RecM1.S5	G0092-2-RecM1	AAMP97	AAMP97-2-RecM1	MZW20791_0184.8.1_RecM1_S5_L001_R1_001.fastq.gz
MZW20791_0184.8.1_G0092_2_RecM1_S5_L001_R2_001.fastq.gz	G0092.2.RecM1.S5	G0092-2-RecM1	AAMP97	AAMP97-2-RecM1	MZW20791_0184.8.1_RecM1_S5_L001_R2_001.fastq.gz
MZW20791_0185.2.1_G0093_1_VagM1_S29_L001_R1_001.fastq.gz	G0093.1.VagM1.S29	G0093-1-VagM1	AAMP98	AAMP98-1-VagM1	MZW20791_0185.2.1_VagM1_S29_L001_R1_001.fastq.gz
MZW20791_0185.2.1_G0093_1_VagM1_S29_L001_R2_001.fastq.gz	G0093.1.VagM1.S29	G0093-1-VagM1	AAMP98	AAMP98-1-VagM1	MZW20791_0185.2.1_VagM1_S29_L001_R2_001.fastq.gz
MZW20791_0185.6.1_G0093_1_OraM1_S17_L001_R1_001.fastq.gz	G0093.1.OraM1.S17	G0093-1-OraM1	AAMP98	AAMP98-1-OraM1	MZW20791_0185.6.1_OraM1_S17_L001_R1_001.fastq.gz
MZW20791_0185.6.1_G0093_1_OraM1_S17_L001_R2_001.fastq.gz	G0093.1.OraM1.S17	G0093-1-OraM1	AAMP98	AAMP98-1-OraM1	MZW20791_0185.6.1_OraM1_S17_L001_R2_001.fastq.gz
MZW20791_0185.8.1_G0093_1_RecM1_S41_L001_R1_001.fastq.gz	G0093.1.RecM1.S41	G0093-1-RecM1	AAMP98	AAMP98-1-RecM1	MZW20791_0185.8.1_RecM1_S41_L001_R1_001.fastq.gz
MZW20791_0185.8.1_G0093_1_RecM1_S41_L001_R2_001.fastq.gz	G0093.1.RecM1.S41	G0093-1-RecM1	AAMP98	AAMP98-1-RecM1	MZW20791_0185.8.1_RecM1_S41_L001_R2_001.fastq.gz
MZW20791_0186.2.1_G0093_2_VagM1_S65_L001_R1_001.fastq.gz	G0093.2.VagM1.S65	G0093-2-VagM1	AAMP98	AAMP98-2-VagM1	MZW20791_0186.2.1_VagM1_S65_L001_R1_001.fastq.gz
MZW20791_0186.2.1_G0093_2_VagM1_S65_L001_R2_001.fastq.gz	G0093.2.VagM1.S65	G0093-2-VagM1	AAMP98	AAMP98-2-VagM1	MZW20791_0186.2.1_VagM1_S65_L001_R2_001.fastq.gz
MZW20791_0186.6.1_G0093_2_OraM1_S53_L001_R1_001.fastq.gz	G0093.2.OraM1.S53	G0093-2-OraM1	AAMP98	AAMP98-2-OraM1	MZW20791_0186.6.1_OraM1_S53_L001_R1_001.fastq.gz
MZW20791_0186.6.1_G0093_2_OraM1_S53_L001_R2_001.fastq.gz	G0093.2.OraM1.S53	G0093-2-OraM1	AAMP98	AAMP98-2-OraM1	MZW20791_0186.6.1_OraM1_S53_L001_R2_001.fastq.gz
MZW20791_0186.8.1_G0093_2_RecM1_S77_L001_R1_001.fastq.gz	G0093.2.RecM1.S77	G0093-2-RecM1	AAMP98	AAMP98-2-RecM1	MZW20791_0186.8.1_RecM1_S77_L001_R1_001.fastq.gz
MZW20791_0186.8.1_G0093_2_RecM1_S77_L001_R2_001.fastq.gz	G0093.2.RecM1.S77	G0093-2-RecM1	AAMP98	AAMP98-2-RecM1	MZW20791_0186.8.1_RecM1_S77_L001_R2_001.fastq.gz
MZW20791_0195.2.1_G0098_1_VagM1_S91_L001_R1_001.fastq.gz	G0098.1.VagM1.S91	G0098-1-VagM1	AAMP99	AAMP99-1-VagM1	MZW20791_0195.2.1_VagM1_S91_L001_R1_001.fastq.gz
MZW20791_0195.2.1_G0098_1_VagM1_S91_L001_R2_001.fastq.gz	G0098.1.VagM1.S91	G0098-1-VagM1	AAMP99	AAMP99-1-VagM1	MZW20791_0195.2.1_VagM1_S91_L001_R2_001.fastq.gz
MZW20791_0195.6.1_G0098_1_OraM1_S79_L001_R1_001.fastq.gz	G0098.1.OraM1.S79	G0098-1-OraM1	AAMP99	AAMP99-1-OraM1	MZW20791_0195.6.1_OraM1_S79_L001_R1_001.fastq.gz
MZW20791_0195.6.1_G0098_1_OraM1_S79_L001_R2_001.fastq.gz	G0098.1.OraM1.S79	G0098-1-OraM1	AAMP99	AAMP99-1-OraM1	MZW20791_0195.6.1_OraM1_S79_L001_R2_001.fastq.gz
MZW20791_0195.8.1_G0098_1_RecM1_S8_L001_R1_001.fastq.gz	G0098.1.RecM1.S8	G0098-1-RecM1	AAMP99	AAMP99-1-RecM1	MZW20791_0195.8.1_RecM1_S8_L001_R1_001.fastq.gz
MZW20791_0195.8.1_G0098_1_RecM1_S8_L001_R2_001.fastq.gz	G0098.1.RecM1.S8	G0098-1-RecM1	AAMP99	AAMP99-1-RecM1	MZW20791_0195.8.1_RecM1_S8_L001_R2_001.fastq.gz
MZW20791_0196.2.1_G0098_2_VagM1_S32_L001_R1_001.fastq.gz	G0098.2.VagM1.S32	G0098-2-VagM1	AAMP99	AAMP99-2-VagM1	MZW20791_0196.2.1_VagM1_S32_L001_R1_001.fastq.gz
MZW20791_0196.2.1_G0098_2_VagM1_S32_L001_R2_001.fastq.gz	G0098.2.VagM1.S32	G0098-2-VagM1	AAMP99	AAMP99-2-VagM1	MZW20791_0196.2.1_VagM1_S32_L001_R2_001.fastq.gz
MZW20791_0196.6.1_G0098_2_OraM1_S20_L001_R1_001.fastq.gz	G0098.2.OraM1.S20	G0098-2-OraM1	AAMP99	AAMP99-2-OraM1	MZW20791_0196.6.1_OraM1_S20_L001_R1_001.fastq.gz
MZW20791_0196.6.1_G0098_2_OraM1_S20_L001_R2_001.fastq.gz	G0098.2.OraM1.S20	G0098-2-OraM1	AAMP99	AAMP99-2-OraM1	MZW20791_0196.6.1_OraM1_S20_L001_R2_001.fastq.gz
MZW20791_0196.8.1_G0098_2_RecM1_S44_L001_R1_001.fastq.gz	G0098.2.RecM1.S44	G0098-2-RecM1	AAMP99	AAMP99-2-RecM1	MZW20791_0196.8.1_RecM1_S44_L001_R1_001.fastq.gz
MZW20791_0196.8.1_G0098_2_RecM1_S44_L001_R2_001.fastq.gz	G0098.2.RecM1.S44	G0098-2-RecM1	AAMP99	AAMP99-2-RecM1	MZW20791_0196.8.1_RecM1_S44_L001_R2_001.fastq.gz
MZW20791_0197.2.1_G0099_1_VagM1_S68_L001_R1_001.fastq.gz	G0099.1.VagM1.S68	G0099-1-VagM1	AAMP100	AAMP100-1-VagM1	MZW20791_0197.2.1_VagM1_S68_L001_R1_001.fastq.gz
MZW20791_0197.2.1_G0099_1_VagM1_S68_L001_R2_001.fastq.gz	G0099.1.VagM1.S68	G0099-1-VagM1	AAMP100	AAMP100-1-VagM1	MZW20791_0197.2.1_VagM1_S68_L001_R2_001.fastq.gz
MZW20791_0197.6.1_G0099_1_OraM1_S56_L001_R1_001.fastq.gz	G0099.1.OraM1.S56	G0099-1-OraM1	AAMP100	AAMP100-1-OraM1	MZW20791_0197.6.1_OraM1_S56_L001_R1_001.fastq.gz
MZW20791_0197.6.1_G0099_1_OraM1_S56_L001_R2_001.fastq.gz	G0099.1.OraM1.S56	G0099-1-OraM1	AAMP100	AAMP100-1-OraM1	MZW20791_0197.6.1_OraM1_S56_L001_R2_001.fastq.gz
MZW20791_0197.8.1_G0099_1_RecM1_S80_L001_R1_001.fastq.gz	G0099.1.RecM1.S80	G0099-1-RecM1	AAMP100	AAMP100-1-RecM1	MZW20791_0197.8.1_RecM1_S80_L001_R1_001.fastq.gz
MZW20791_0197.8.1_G0099_1_RecM1_S80_L001_R2_001.fastq.gz	G0099.1.RecM1.S80	G0099-1-RecM1	AAMP100	AAMP100-1-RecM1	MZW20791_0197.8.1_RecM1_S80_L001_R2_001.fastq.gz
MZW20791_0198.2.1_G0099_2_VagM1_S9_L001_R1_001.fastq.gz	G0099.2.VagM1.S9	G0099-2-VagM1	AAMP100	AAMP100-2-VagM1	MZW20791_0198.2.1_VagM1_S9_L001_R1_001.fastq.gz
MZW20791_0198.2.1_G0099_2_VagM1_S9_L001_R2_001.fastq.gz	G0099.2.VagM1.S9	G0099-2-VagM1	AAMP100	AAMP100-2-VagM1	MZW20791_0198.2.1_VagM1_S9_L001_R2_001.fastq.gz
MZW20791_0198.6.1_G0099_2_OraM1_S92_L001_R1_001.fastq.gz	G0099.2.OraM1.S92	G0099-2-OraM1	AAMP100	AAMP100-2-OraM1	MZW20791_0198.6.1_OraM1_S92_L001_R1_001.fastq.gz
MZW20791_0198.6.1_G0099_2_OraM1_S92_L001_R2_001.fastq.gz	G0099.2.OraM1.S92	G0099-2-OraM1	AAMP100	AAMP100-2-OraM1	MZW20791_0198.6.1_OraM1_S92_L001_R2_001.fastq.gz
MZW20791_0198.8.1_G0099_2_RecM1_S21_L001_R1_001.fastq.gz	G0099.2.RecM1.S21	G0099-2-RecM1	AAMP100	AAMP100-2-RecM1	MZW20791_0198.8.1_RecM1_S21_L001_R1_001.fastq.gz
MZW20791_0198.8.1_G0099_2_RecM1_S21_L001_R2_001.fastq.gz	G0099.2.RecM1.S21	G0099-2-RecM1	AAMP100	AAMP100-2-RecM1	MZW20791_0198.8.1_RecM1_S21_L001_R2_001.fastq.gz
MZW20791_0199.2.1_G0100_1_VagM1_S45_L001_R1_001.fastq.gz	G0100.1.VagM1.S45	G0100-1-VagM1	AAMP101	AAMP101-1-VagM1	MZW20791_0199.2.1_VagM1_S45_L001_R1_001.fastq.gz
MZW20791_0199.2.1_G0100_1_VagM1_S45_L001_R2_001.fastq.gz	G0100.1.VagM1.S45	G0100-1-VagM1	AAMP101	AAMP101-1-VagM1	MZW20791_0199.2.1_VagM1_S45_L001_R2_001.fastq.gz
MZW20791_0199.6.1_G0100_1_OraM1_S33_L001_R1_001.fastq.gz	G0100.1.OraM1.S33	G0100-1-OraM1	AAMP101	AAMP101-1-OraM1	MZW20791_0199.6.1_OraM1_S33_L001_R1_001.fastq.gz
MZW20791_0199.6.1_G0100_1_OraM1_S33_L001_R2_001.fastq.gz	G0100.1.OraM1.S33	G0100-1-OraM1	AAMP101	AAMP101-1-OraM1	MZW20791_0199.6.1_OraM1_S33_L001_R2_001.fastq.gz
MZW20791_0199.8.1_G0100_1_RecM1_S57_L001_R1_001.fastq.gz	G0100.1.RecM1.S57	G0100-1-RecM1	AAMP101	AAMP101-1-RecM1	MZW20791_0199.8.1_RecM1_S57_L001_R1_001.fastq.gz
MZW20791_0199.8.1_G0100_1_RecM1_S57_L001_R2_001.fastq.gz	G0100.1.RecM1.S57	G0100-1-RecM1	AAMP101	AAMP101-1-RecM1	MZW20791_0199.8.1_RecM1_S57_L001_R2_001.fastq.gz
MZW20791_0200.2.1_G0100_2_VagM1_S22_L001_R1_001.fastq.gz	G0100.2.VagM1.S22	G0100-2-VagM1	AAMP101	AAMP101-2-VagM1	MZW20791_0200.2.1_VagM1_S22_L001_R1_001.fastq.gz
MZW20791_0200.2.1_G0100_2_VagM1_S22_L001_R2_001.fastq.gz	G0100.2.VagM1.S22	G0100-2-VagM1	AAMP101	AAMP101-2-VagM1	MZW20791_0200.2.1_VagM1_S22_L001_R2_001.fastq.gz
MZW20791_0200.6.1_G0100_2_OraM1_S10_L001_R1_001.fastq.gz	G0100.2.OraM1.S10	G0100-2-OraM1	AAMP101	AAMP101-2-OraM1	MZW20791_0200.6.1_OraM1_S10_L001_R1_001.fastq.gz
MZW20791_0200.6.1_G0100_2_OraM1_S10_L001_R2_001.fastq.gz	G0100.2.OraM1.S10	G0100-2-OraM1	AAMP101	AAMP101-2-OraM1	MZW20791_0200.6.1_OraM1_S10_L001_R2_001.fastq.gz
MZW20791_0200.8.1_G0100_2_RecM1_S34_L001_R1_001.fastq.gz	G0100.2.RecM1.S34	G0100-2-RecM1	AAMP101	AAMP101-2-RecM1	MZW20791_0200.8.1_RecM1_S34_L001_R1_001.fastq.gz
MZW20791_0200.8.1_G0100_2_RecM1_S34_L001_R2_001.fastq.gz	G0100.2.RecM1.S34	G0100-2-RecM1	AAMP101	AAMP101-2-RecM1	MZW20791_0200.8.1_RecM1_S34_L001_R2_001.fastq.gz
MZW20791_0201.2.1_G0101_1_VagM1_S58_L001_R1_001.fastq.gz	G0101.1.VagM1.S58	G0101-1-VagM1	AAMP102	AAMP102-1-VagM1	MZW20791_0201.2.1_VagM1_S58_L001_R1_001.fastq.gz
MZW20791_0201.2.1_G0101_1_VagM1_S58_L001_R2_001.fastq.gz	G0101.1.VagM1.S58	G0101-1-VagM1	AAMP102	AAMP102-1-VagM1	MZW20791_0201.2.1_VagM1_S58_L001_R2_001.fastq.gz
MZW20791_0201.6.1_G0101_1_OraM1_S46_L001_R1_001.fastq.gz	G0101.1.OraM1.S46	G0101-1-OraM1	AAMP102	AAMP102-1-OraM1	MZW20791_0201.6.1_OraM1_S46_L001_R1_001.fastq.gz
MZW20791_0201.6.1_G0101_1_OraM1_S46_L001_R2_001.fastq.gz	G0101.1.OraM1.S46	G0101-1-OraM1	AAMP102	AAMP102-1-OraM1	MZW20791_0201.6.1_OraM1_S46_L001_R2_001.fastq.gz
MZW20791_0202.2.1_G0101_2_VagM1_S94_L001_R1_001.fastq.gz	G0101.2.VagM1.S94	G0101-2-VagM1	AAMP102	AAMP102-2-VagM1	MZW20791_0202.2.1_VagM1_S94_L001_R1_001.fastq.gz
MZW20791_0202.2.1_G0101_2_VagM1_S94_L001_R2_001.fastq.gz	G0101.2.VagM1.S94	G0101-2-VagM1	AAMP102	AAMP102-2-VagM1	MZW20791_0202.2.1_VagM1_S94_L001_R2_001.fastq.gz
MZW20791_0202.6.1_G0101_2_OraM1_S82_L001_R1_001.fastq.gz	G0101.2.OraM1.S82	G0101-2-OraM1	AAMP102	AAMP102-2-OraM1	MZW20791_0202.6.1_OraM1_S82_L001_R1_001.fastq.gz
MZW20791_0202.6.1_G0101_2_OraM1_S82_L001_R2_001.fastq.gz	G0101.2.OraM1.S82	G0101-2-OraM1	AAMP102	AAMP102-2-OraM1	MZW20791_0202.6.1_OraM1_S82_L001_R2_001.fastq.gz
MZW20791_0203.2.1_G0102_1_VagM1_S35_L001_R1_001.fastq.gz	G0102.1.VagM1.S35	G0102-1-VagM1	AAMP103	AAMP103-1-VagM1	MZW20791_0203.2.1_VagM1_S35_L001_R1_001.fastq.gz
MZW20791_0203.2.1_G0102_1_VagM1_S35_L001_R2_001.fastq.gz	G0102.1.VagM1.S35	G0102-1-VagM1	AAMP103	AAMP103-1-VagM1	MZW20791_0203.2.1_VagM1_S35_L001_R2_001.fastq.gz
MZW20791_0203.6.1_G0102_1_OraM1_S23_L001_R1_001.fastq.gz	G0102.1.OraM1.S23	G0102-1-OraM1	AAMP103	AAMP103-1-OraM1	MZW20791_0203.6.1_OraM1_S23_L001_R1_001.fastq.gz
MZW20791_0203.6.1_G0102_1_OraM1_S23_L001_R2_001.fastq.gz	G0102.1.OraM1.S23	G0102-1-OraM1	AAMP103	AAMP103-1-OraM1	MZW20791_0203.6.1_OraM1_S23_L001_R2_001.fastq.gz
MZW20791_0204.2.1_G0102_2_VagM1_S71_L001_R1_001.fastq.gz	G0102.2.VagM1.S71	G0102-2-VagM1	AAMP103	AAMP103-2-VagM1	MZW20791_0204.2.1_VagM1_S71_L001_R1_001.fastq.gz
MZW20791_0204.2.1_G0102_2_VagM1_S71_L001_R2_001.fastq.gz	G0102.2.VagM1.S71	G0102-2-VagM1	AAMP103	AAMP103-2-VagM1	MZW20791_0204.2.1_VagM1_S71_L001_R2_001.fastq.gz
MZW20791_0204.6.1_G0102_2_OraM1_S59_L001_R1_001.fastq.gz	G0102.2.OraM1.S59	G0102-2-OraM1	AAMP103	AAMP103-2-OraM1	MZW20791_0204.6.1_OraM1_S59_L001_R1_001.fastq.gz
MZW20791_0204.6.1_G0102_2_OraM1_S59_L001_R2_001.fastq.gz	G0102.2.OraM1.S59	G0102-2-OraM1	AAMP103	AAMP103-2-OraM1	MZW20791_0204.6.1_OraM1_S59_L001_R2_001.fastq.gz
MZW20791_0205.2.1_G0103_1_VagM1_S12_L001_R1_001.fastq.gz	G0103.1.VagM1.S12	G0103-1-VagM1	AAMP104	AAMP104-1-VagM1	MZW20791_0205.2.1_VagM1_S12_L001_R1_001.fastq.gz
MZW20791_0205.2.1_G0103_1_VagM1_S12_L001_R2_001.fastq.gz	G0103.1.VagM1.S12	G0103-1-VagM1	AAMP104	AAMP104-1-VagM1	MZW20791_0205.2.1_VagM1_S12_L001_R2_001.fastq.gz
MZW20791_0205.6.1_G0103_1_OraM1_S95_L001_R1_001.fastq.gz	G0103.1.OraM1.S95	G0103-1-OraM1	AAMP104	AAMP104-1-OraM1	MZW20791_0205.6.1_OraM1_S95_L001_R1_001.fastq.gz
MZW20791_0205.6.1_G0103_1_OraM1_S95_L001_R2_001.fastq.gz	G0103.1.OraM1.S95	G0103-1-OraM1	AAMP104	AAMP104-1-OraM1	MZW20791_0205.6.1_OraM1_S95_L001_R2_001.fastq.gz
MZW20791_0206.2.1_G0103_2_VagM1_S48_L001_R1_001.fastq.gz	G0103.2.VagM1.S48	G0103-2-VagM1	AAMP104	AAMP104-2-VagM1	MZW20791_0206.2.1_VagM1_S48_L001_R1_001.fastq.gz
MZW20791_0206.2.1_G0103_2_VagM1_S48_L001_R2_001.fastq.gz	G0103.2.VagM1.S48	G0103-2-VagM1	AAMP104	AAMP104-2-VagM1	MZW20791_0206.2.1_VagM1_S48_L001_R2_001.fastq.gz
MZW20791_0206.6.1_G0103_2_OraM1_S36_L001_R1_001.fastq.gz	G0103.2.OraM1.S36	G0103-2-OraM1	AAMP104	AAMP104-2-OraM1	MZW20791_0206.6.1_OraM1_S36_L001_R1_001.fastq.gz
MZW20791_0206.6.1_G0103_2_OraM1_S36_L001_R2_001.fastq.gz	G0103.2.OraM1.S36	G0103-2-OraM1	AAMP104	AAMP104-2-OraM1	MZW20791_0206.6.1_OraM1_S36_L001_R2_001.fastq.gz
MZW20791_1007.2.1_E0504_1_VagM1_S13_L001_R1_001.fastq.gz	E0504.1.VagM1.S13	E0504-1-VagM1	AAMP1	AAMP1-1-VagM1	MZW20791_1007.2.1_VagM1_S13_L001_R1_001.fastq.gz
MZW20791_1007.2.1_E0504_1_VagM1_S13_L001_R2_001.fastq.gz	E0504.1.VagM1.S13	E0504-1-VagM1	AAMP1	AAMP1-1-VagM1	MZW20791_1007.2.1_VagM1_S13_L001_R2_001.fastq.gz
MZW20791_1008.2.1_E0504_2_VagM1_S49_L001_R1_001.fastq.gz	E0504.2.VagM1.S49	E0504-2-VagM1	AAMP1	AAMP1-2-VagM1	MZW20791_1008.2.1_VagM1_S49_L001_R1_001.fastq.gz
MZW20791_1008.2.1_E0504_2_VagM1_S49_L001_R2_001.fastq.gz	E0504.2.VagM1.S49	E0504-2-VagM1	AAMP1	AAMP1-2-VagM1	MZW20791_1008.2.1_VagM1_S49_L001_R2_001.fastq.gz
MZW20791_1011.6.1_E0506_1_OraM1_S73_L001_R1_001.fastq.gz	E0506.1.OraM1.S73	E0506-1-OraM1	AAMP2	AAMP2-1-OraM1	MZW20791_1011.6.1_OraM1_S73_L001_R1_001.fastq.gz
MZW20791_1011.6.1_E0506_1_OraM1_S73_L001_R2_001.fastq.gz	E0506.1.OraM1.S73	E0506-1-OraM1	AAMP2	AAMP2-1-OraM1	MZW20791_1011.6.1_OraM1_S73_L001_R2_001.fastq.gz
MZW20791_1011.8.1_E0506_1_RecM1_S2_L001_R1_001.fastq.gz	E0506.1.RecM1.S2	E0506-1-RecM1	AAMP2	AAMP2-1-RecM1	MZW20791_1011.8.1_RecM1_S2_L001_R1_001.fastq.gz
MZW20791_1011.8.1_E0506_1_RecM1_S2_L001_R2_001.fastq.gz	E0506.1.RecM1.S2	E0506-1-RecM1	AAMP2	AAMP2-1-RecM1	MZW20791_1011.8.1_RecM1_S2_L001_R2_001.fastq.gz
MZW20791_1012.6.1_E0506_2_OraM1_S14_L001_R1_001.fastq.gz	E0506.2.OraM1.S14	E0506-2-OraM1	AAMP2	AAMP2-2-OraM1	MZW20791_1012.6.1_OraM1_S14_L001_R1_001.fastq.gz
MZW20791_1012.6.1_E0506_2_OraM1_S14_L001_R2_001.fastq.gz	E0506.2.OraM1.S14	E0506-2-OraM1	AAMP2	AAMP2-2-OraM1	MZW20791_1012.6.1_OraM1_S14_L001_R2_001.fastq.gz
MZW20791_1012.8.1_E0506_2_RecM1_S38_L001_R1_001.fastq.gz	E0506.2.RecM1.S38	E0506-2-RecM1	AAMP2	AAMP2-2-RecM1	MZW20791_1012.8.1_RecM1_S38_L001_R1_001.fastq.gz
MZW20791_1012.8.1_E0506_2_RecM1_S38_L001_R2_001.fastq.gz	E0506.2.RecM1.S38	E0506-2-RecM1	AAMP2	AAMP2-2-RecM1	MZW20791_1012.8.1_RecM1_S38_L001_R2_001.fastq.gz
MZW20791_1015.6.1_E0508_1_OraM1_S50_L001_R1_001.fastq.gz	E0508.1.OraM1.S50	E0508-1-OraM1	AAMP3	AAMP3-1-OraM1	MZW20791_1015.6.1_OraM1_S50_L001_R1_001.fastq.gz
MZW20791_1015.6.1_E0508_1_OraM1_S50_L001_R2_001.fastq.gz	E0508.1.OraM1.S50	E0508-1-OraM1	AAMP3	AAMP3-1-OraM1	MZW20791_1015.6.1_OraM1_S50_L001_R2_001.fastq.gz
MZW20791_1016.6.1_E0508_2_OraM1_S86_L001_R1_001.fastq.gz	E0508.2.OraM1.S86	E0508-2-OraM1	AAMP3	AAMP3-2-OraM1	MZW20791_1016.6.1_OraM1_S86_L001_R1_001.fastq.gz
MZW20791_1016.6.1_E0508_2_OraM1_S86_L001_R2_001.fastq.gz	E0508.2.OraM1.S86	E0508-2-OraM1	AAMP3	AAMP3-2-OraM1	MZW20791_1016.6.1_OraM1_S86_L001_R2_001.fastq.gz
MZW20791_1021.2.1_E0511_1_VagM1_S16_L001_R1_001.fastq.gz	E0511.1.VagM1.S16	E0511-1-VagM1	AAMP4	AAMP4-1-VagM1	MZW20791_1021.2.1_VagM1_S16_L001_R1_001.fastq.gz
MZW20791_1021.2.1_E0511_1_VagM1_S16_L001_R2_001.fastq.gz	E0511.1.VagM1.S16	E0511-1-VagM1	AAMP4	AAMP4-1-VagM1	MZW20791_1021.2.1_VagM1_S16_L001_R2_001.fastq.gz
MZW20791_1021.6.1_E0511_1_OraM1_S4_L001_R1_001.fastq.gz	E0511.1.OraM1.S4	E0511-1-OraM1	AAMP4	AAMP4-1-OraM1	MZW20791_1021.6.1_OraM1_S4_L001_R1_001.fastq.gz
MZW20791_1021.6.1_E0511_1_OraM1_S4_L001_R2_001.fastq.gz	E0511.1.OraM1.S4	E0511-1-OraM1	AAMP4	AAMP4-1-OraM1	MZW20791_1021.6.1_OraM1_S4_L001_R2_001.fastq.gz
MZW20791_1022.2.1_E0511_2_VagM1_S52_L001_R1_001.fastq.gz	E0511.2.VagM1.S52	E0511-2-VagM1	AAMP4	AAMP4-2-VagM1	MZW20791_1022.2.1_VagM1_S52_L001_R1_001.fastq.gz
MZW20791_1022.2.1_E0511_2_VagM1_S52_L001_R2_001.fastq.gz	E0511.2.VagM1.S52	E0511-2-VagM1	AAMP4	AAMP4-2-VagM1	MZW20791_1022.2.1_VagM1_S52_L001_R2_001.fastq.gz
MZW20791_1022.6.1_E0511_2_OraM1_S40_L001_R1_001.fastq.gz	E0511.2.OraM1.S40	E0511-2-OraM1	AAMP4	AAMP4-2-OraM1	MZW20791_1022.6.1_OraM1_S40_L001_R1_001.fastq.gz
MZW20791_1022.6.1_E0511_2_OraM1_S40_L001_R2_001.fastq.gz	E0511.2.OraM1.S40	E0511-2-OraM1	AAMP4	AAMP4-2-OraM1	MZW20791_1022.6.1_OraM1_S40_L001_R2_001.fastq.gz
MZW20791_1025.2.1_E0513_1_VagM1_S88_L001_R1_001.fastq.gz	E0513.1.VagM1.S88	E0513-1-VagM1	AAMP5	AAMP5-1-VagM1	MZW20791_1025.2.1_VagM1_S88_L001_R1_001.fastq.gz
MZW20791_1025.2.1_E0513_1_VagM1_S88_L001_R2_001.fastq.gz	E0513.1.VagM1.S88	E0513-1-VagM1	AAMP5	AAMP5-1-VagM1	MZW20791_1025.2.1_VagM1_S88_L001_R2_001.fastq.gz
MZW20791_1025.6.1_E0513_1_OraM1_S76_L001_R1_001.fastq.gz	E0513.1.OraM1.S76	E0513-1-OraM1	AAMP5	AAMP5-1-OraM1	MZW20791_1025.6.1_OraM1_S76_L001_R1_001.fastq.gz
MZW20791_1025.6.1_E0513_1_OraM1_S76_L001_R2_001.fastq.gz	E0513.1.OraM1.S76	E0513-1-OraM1	AAMP5	AAMP5-1-OraM1	MZW20791_1025.6.1_OraM1_S76_L001_R2_001.fastq.gz
MZW20791_1025.8.1_E0513_1_RecM1_S5_L001_R1_001.fastq.gz	E0513.1.RecM1.S5	E0513-1-RecM1	AAMP5	AAMP5-1-RecM1	MZW20791_1025.8.1_RecM1_S5_L001_R1_001.fastq.gz
MZW20791_1025.8.1_E0513_1_RecM1_S5_L001_R2_001.fastq.gz	E0513.1.RecM1.S5	E0513-1-RecM1	AAMP5	AAMP5-1-RecM1	MZW20791_1025.8.1_RecM1_S5_L001_R2_001.fastq.gz
MZW20791_1026.2.1_E0513_2_VagM1_S29_L001_R1_001.fastq.gz	E0513.2.VagM1.S29	E0513-2-VagM1	AAMP5	AAMP5-2-VagM1	MZW20791_1026.2.1_VagM1_S29_L001_R1_001.fastq.gz
MZW20791_1026.2.1_E0513_2_VagM1_S29_L001_R2_001.fastq.gz	E0513.2.VagM1.S29	E0513-2-VagM1	AAMP5	AAMP5-2-VagM1	MZW20791_1026.2.1_VagM1_S29_L001_R2_001.fastq.gz
MZW20791_1026.6.1_E0513_2_OraM1_S17_L001_R1_001.fastq.gz	E0513.2.OraM1.S17	E0513-2-OraM1	AAMP5	AAMP5-2-OraM1	MZW20791_1026.6.1_OraM1_S17_L001_R1_001.fastq.gz
MZW20791_1026.6.1_E0513_2_OraM1_S17_L001_R2_001.fastq.gz	E0513.2.OraM1.S17	E0513-2-OraM1	AAMP5	AAMP5-2-OraM1	MZW20791_1026.6.1_OraM1_S17_L001_R2_001.fastq.gz
MZW20791_1026.8.1_E0513_2_RecM1_S41_L001_R1_001.fastq.gz	E0513.2.RecM1.S41	E0513-2-RecM1	AAMP5	AAMP5-2-RecM1	MZW20791_1026.8.1_RecM1_S41_L001_R1_001.fastq.gz
MZW20791_1026.8.1_E0513_2_RecM1_S41_L001_R2_001.fastq.gz	E0513.2.RecM1.S41	E0513-2-RecM1	AAMP5	AAMP5-2-RecM1	MZW20791_1026.8.1_RecM1_S41_L001_R2_001.fastq.gz
MZW20791_1047.2.1_E0524_1_VagM1_S42_L001_R1_001.fastq.gz	E0524.1.VagM1.S42	E0524-1-VagM1	AAMP6	AAMP6-1-VagM1	MZW20791_1047.2.1_VagM1_S42_L001_R1_001.fastq.gz
MZW20791_1047.2.1_E0524_1_VagM1_S42_L001_R2_001.fastq.gz	E0524.1.VagM1.S42	E0524-1-VagM1	AAMP6	AAMP6-1-VagM1	MZW20791_1047.2.1_VagM1_S42_L001_R2_001.fastq.gz
MZW20791_1047.6.1_E0524_1_OraM1_S30_L001_R1_001.fastq.gz	E0524.1.OraM1.S30	E0524-1-OraM1	AAMP6	AAMP6-1-OraM1	MZW20791_1047.6.1_OraM1_S30_L001_R1_001.fastq.gz
MZW20791_1047.6.1_E0524_1_OraM1_S30_L001_R2_001.fastq.gz	E0524.1.OraM1.S30	E0524-1-OraM1	AAMP6	AAMP6-1-OraM1	MZW20791_1047.6.1_OraM1_S30_L001_R2_001.fastq.gz
MZW20791_1047.8.1_E0524_1_RecM1_S54_L001_R1_001.fastq.gz	E0524.1.RecM1.S54	E0524-1-RecM1	AAMP6	AAMP6-1-RecM1	MZW20791_1047.8.1_RecM1_S54_L001_R1_001.fastq.gz
MZW20791_1047.8.1_E0524_1_RecM1_S54_L001_R2_001.fastq.gz	E0524.1.RecM1.S54	E0524-1-RecM1	AAMP6	AAMP6-1-RecM1	MZW20791_1047.8.1_RecM1_S54_L001_R2_001.fastq.gz
MZW20791_1048.2.1_E0524_2_VagM1_S19_L001_R1_001.fastq.gz	E0524.2.VagM1.S19	E0524-2-VagM1	AAMP6	AAMP6-2-VagM1	MZW20791_1048.2.1_VagM1_S19_L001_R1_001.fastq.gz
MZW20791_1048.2.1_E0524_2_VagM1_S19_L001_R2_001.fastq.gz	E0524.2.VagM1.S19	E0524-2-VagM1	AAMP6	AAMP6-2-VagM1	MZW20791_1048.2.1_VagM1_S19_L001_R2_001.fastq.gz
MZW20791_1048.6.1_E0524_2_OraM1_S7_L001_R1_001.fastq.gz	E0524.2.OraM1.S7	E0524-2-OraM1	AAMP6	AAMP6-2-OraM1	MZW20791_1048.6.1_OraM1_S7_L001_R1_001.fastq.gz
MZW20791_1048.6.1_E0524_2_OraM1_S7_L001_R2_001.fastq.gz	E0524.2.OraM1.S7	E0524-2-OraM1	AAMP6	AAMP6-2-OraM1	MZW20791_1048.6.1_OraM1_S7_L001_R2_001.fastq.gz
MZW20791_1048.8.1_E0524_2_RecM1_S31_L001_R1_001.fastq.gz	E0524.2.RecM1.S31	E0524-2-RecM1	AAMP6	AAMP6-2-RecM1	MZW20791_1048.8.1_RecM1_S31_L001_R1_001.fastq.gz
MZW20791_1048.8.1_E0524_2_RecM1_S31_L001_R2_001.fastq.gz	E0524.2.RecM1.S31	E0524-2-RecM1	AAMP6	AAMP6-2-RecM1	MZW20791_1048.8.1_RecM1_S31_L001_R2_001.fastq.gz
MZW20791_1063.2.1_E0532_1_VagM1_S91_L001_R1_001.fastq.gz	E0532.1.VagM1.S91	E0532-1-VagM1	AAMP7	AAMP7-1-VagM1	MZW20791_1063.2.1_VagM1_S91_L001_R1_001.fastq.gz
MZW20791_1063.2.1_E0532_1_VagM1_S91_L001_R2_001.fastq.gz	E0532.1.VagM1.S91	E0532-1-VagM1	AAMP7	AAMP7-1-VagM1	MZW20791_1063.2.1_VagM1_S91_L001_R2_001.fastq.gz
MZW20791_1063.6.1_E0532_1_OraM1_S79_L001_R1_001.fastq.gz	E0532.1.OraM1.S79	E0532-1-OraM1	AAMP7	AAMP7-1-OraM1	MZW20791_1063.6.1_OraM1_S79_L001_R1_001.fastq.gz
MZW20791_1063.6.1_E0532_1_OraM1_S79_L001_R2_001.fastq.gz	E0532.1.OraM1.S79	E0532-1-OraM1	AAMP7	AAMP7-1-OraM1	MZW20791_1063.6.1_OraM1_S79_L001_R2_001.fastq.gz
MZW20791_1063.8.1_E0532_1_RecM1_S8_L001_R1_001.fastq.gz	E0532.1.RecM1.S8	E0532-1-RecM1	AAMP7	AAMP7-1-RecM1	MZW20791_1063.8.1_RecM1_S8_L001_R1_001.fastq.gz
MZW20791_1063.8.1_E0532_1_RecM1_S8_L001_R2_001.fastq.gz	E0532.1.RecM1.S8	E0532-1-RecM1	AAMP7	AAMP7-1-RecM1	MZW20791_1063.8.1_RecM1_S8_L001_R2_001.fastq.gz
MZW20791_1064.2.1_E0532_2_VagM1_S32_L001_R1_001.fastq.gz	E0532.2.VagM1.S32	E0532-2-VagM1	AAMP7	AAMP7-2-VagM1	MZW20791_1064.2.1_VagM1_S32_L001_R1_001.fastq.gz
MZW20791_1064.2.1_E0532_2_VagM1_S32_L001_R2_001.fastq.gz	E0532.2.VagM1.S32	E0532-2-VagM1	AAMP7	AAMP7-2-VagM1	MZW20791_1064.2.1_VagM1_S32_L001_R2_001.fastq.gz
MZW20791_1064.6.1_E0532_2_OraM1_S20_L001_R1_001.fastq.gz	E0532.2.OraM1.S20	E0532-2-OraM1	AAMP7	AAMP7-2-OraM1	MZW20791_1064.6.1_OraM1_S20_L001_R1_001.fastq.gz
MZW20791_1064.6.1_E0532_2_OraM1_S20_L001_R2_001.fastq.gz	E0532.2.OraM1.S20	E0532-2-OraM1	AAMP7	AAMP7-2-OraM1	MZW20791_1064.6.1_OraM1_S20_L001_R2_001.fastq.gz
MZW20791_1064.8.1_E0532_2_RecM1_S44_L001_R1_001.fastq.gz	E0532.2.RecM1.S44	E0532-2-RecM1	AAMP7	AAMP7-2-RecM1	MZW20791_1064.8.1_RecM1_S44_L001_R1_001.fastq.gz
MZW20791_1064.8.1_E0532_2_RecM1_S44_L001_R2_001.fastq.gz	E0532.2.RecM1.S44	E0532-2-RecM1	AAMP7	AAMP7-2-RecM1	MZW20791_1064.8.1_RecM1_S44_L001_R2_001.fastq.gz
MZW20791_1073.2.1_E0537_1_VagM1_S68_L001_R1_001.fastq.gz	E0537.1.VagM1.S68	E0537-1-VagM1	AAMP8	AAMP8-1-VagM1	MZW20791_1073.2.1_VagM1_S68_L001_R1_001.fastq.gz
MZW20791_1073.2.1_E0537_1_VagM1_S68_L001_R2_001.fastq.gz	E0537.1.VagM1.S68	E0537-1-VagM1	AAMP8	AAMP8-1-VagM1	MZW20791_1073.2.1_VagM1_S68_L001_R2_001.fastq.gz
MZW20791_1073.6.1_E0537_1_OraM1_S56_L001_R1_001.fastq.gz	E0537.1.OraM1.S56	E0537-1-OraM1	AAMP8	AAMP8-1-OraM1	MZW20791_1073.6.1_OraM1_S56_L001_R1_001.fastq.gz
MZW20791_1073.6.1_E0537_1_OraM1_S56_L001_R2_001.fastq.gz	E0537.1.OraM1.S56	E0537-1-OraM1	AAMP8	AAMP8-1-OraM1	MZW20791_1073.6.1_OraM1_S56_L001_R2_001.fastq.gz
MZW20791_1074.2.1_E0537_2_VagM1_S9_L001_R1_001.fastq.gz	E0537.2.VagM1.S9	E0537-2-VagM1	AAMP8	AAMP8-2-VagM1	MZW20791_1074.2.1_VagM1_S9_L001_R1_001.fastq.gz
MZW20791_1074.2.1_E0537_2_VagM1_S9_L001_R2_001.fastq.gz	E0537.2.VagM1.S9	E0537-2-VagM1	AAMP8	AAMP8-2-VagM1	MZW20791_1074.2.1_VagM1_S9_L001_R2_001.fastq.gz
MZW20791_1074.6.1_E0537_2_OraM1_S92_L001_R1_001.fastq.gz	E0537.2.OraM1.S92	E0537-2-OraM1	AAMP8	AAMP8-2-OraM1	MZW20791_1074.6.1_OraM1_S92_L001_R1_001.fastq.gz
MZW20791_1074.6.1_E0537_2_OraM1_S92_L001_R2_001.fastq.gz	E0537.2.OraM1.S92	E0537-2-OraM1	AAMP8	AAMP8-2-OraM1	MZW20791_1074.6.1_OraM1_S92_L001_R2_001.fastq.gz
MZW20791_1075.2.1_E0538_1_VagM1_S45_L001_R1_001.fastq.gz	E0538.1.VagM1.S45	E0538-1-VagM1	AAMP9	AAMP9-1-VagM1	MZW20791_1075.2.1_VagM1_S45_L001_R1_001.fastq.gz
MZW20791_1075.2.1_E0538_1_VagM1_S45_L001_R2_001.fastq.gz	E0538.1.VagM1.S45	E0538-1-VagM1	AAMP9	AAMP9-1-VagM1	MZW20791_1075.2.1_VagM1_S45_L001_R2_001.fastq.gz
MZW20791_1075.6.1_E0538_1_OraM1_S33_L001_R1_001.fastq.gz	E0538.1.OraM1.S33	E0538-1-OraM1	AAMP9	AAMP9-1-OraM1	MZW20791_1075.6.1_OraM1_S33_L001_R1_001.fastq.gz
MZW20791_1075.6.1_E0538_1_OraM1_S33_L001_R2_001.fastq.gz	E0538.1.OraM1.S33	E0538-1-OraM1	AAMP9	AAMP9-1-OraM1	MZW20791_1075.6.1_OraM1_S33_L001_R2_001.fastq.gz
MZW20791_1075.8.1_E0538_1_RecM1_S57_L001_R1_001.fastq.gz	E0538.1.RecM1.S57	E0538-1-RecM1	AAMP9	AAMP9-1-RecM1	MZW20791_1075.8.1_RecM1_S57_L001_R1_001.fastq.gz
MZW20791_1075.8.1_E0538_1_RecM1_S57_L001_R2_001.fastq.gz	E0538.1.RecM1.S57	E0538-1-RecM1	AAMP9	AAMP9-1-RecM1	MZW20791_1075.8.1_RecM1_S57_L001_R2_001.fastq.gz
MZW20791_1076.2.1_E0538_2_VagM1_S22_L001_R1_001.fastq.gz	E0538.2.VagM1.S22	E0538-2-VagM1	AAMP9	AAMP9-2-VagM1	MZW20791_1076.2.1_VagM1_S22_L001_R1_001.fastq.gz
MZW20791_1076.2.1_E0538_2_VagM1_S22_L001_R2_001.fastq.gz	E0538.2.VagM1.S22	E0538-2-VagM1	AAMP9	AAMP9-2-VagM1	MZW20791_1076.2.1_VagM1_S22_L001_R2_001.fastq.gz
MZW20791_1076.6.1_E0538_2_OraM1_S10_L001_R1_001.fastq.gz	E0538.2.OraM1.S10	E0538-2-OraM1	AAMP9	AAMP9-2-OraM1	MZW20791_1076.6.1_OraM1_S10_L001_R1_001.fastq.gz
MZW20791_1076.6.1_E0538_2_OraM1_S10_L001_R2_001.fastq.gz	E0538.2.OraM1.S10	E0538-2-OraM1	AAMP9	AAMP9-2-OraM1	MZW20791_1076.6.1_OraM1_S10_L001_R2_001.fastq.gz
MZW20791_1076.8.1_E0538_2_RecM1_S34_L001_R1_001.fastq.gz	E0538.2.RecM1.S34	E0538-2-RecM1	AAMP9	AAMP9-2-RecM1	MZW20791_1076.8.1_RecM1_S34_L001_R1_001.fastq.gz
MZW20791_1076.8.1_E0538_2_RecM1_S34_L001_R2_001.fastq.gz	E0538.2.RecM1.S34	E0538-2-RecM1	AAMP9	AAMP9-2-RecM1	MZW20791_1076.8.1_RecM1_S34_L001_R2_001.fastq.gz
MZW20791_1089.2.1_E0545_1_VagM1_S94_L001_R1_001.fastq.gz	E0545.1.VagM1.S94	E0545-1-VagM1	AAMP10	AAMP10-1-VagM1	MZW20791_1089.2.1_VagM1_S94_L001_R1_001.fastq.gz
MZW20791_1089.2.1_E0545_1_VagM1_S94_L001_R2_001.fastq.gz	E0545.1.VagM1.S94	E0545-1-VagM1	AAMP10	AAMP10-1-VagM1	MZW20791_1089.2.1_VagM1_S94_L001_R2_001.fastq.gz
MZW20791_1089.6.1_E0545_1_OraM1_S82_L001_R1_001.fastq.gz	E0545.1.OraM1.S82	E0545-1-OraM1	AAMP10	AAMP10-1-OraM1	MZW20791_1089.6.1_OraM1_S82_L001_R1_001.fastq.gz
MZW20791_1089.6.1_E0545_1_OraM1_S82_L001_R2_001.fastq.gz	E0545.1.OraM1.S82	E0545-1-OraM1	AAMP10	AAMP10-1-OraM1	MZW20791_1089.6.1_OraM1_S82_L001_R2_001.fastq.gz
MZW20791_1090.2.1_E0545_2_VagM1_S35_L001_R1_001.fastq.gz	E0545.2.VagM1.S35	E0545-2-VagM1	AAMP10	AAMP10-2-VagM1	MZW20791_1090.2.1_VagM1_S35_L001_R1_001.fastq.gz
MZW20791_1090.2.1_E0545_2_VagM1_S35_L001_R2_001.fastq.gz	E0545.2.VagM1.S35	E0545-2-VagM1	AAMP10	AAMP10-2-VagM1	MZW20791_1090.2.1_VagM1_S35_L001_R2_001.fastq.gz
MZW20791_1090.6.1_E0545_2_OraM1_S23_L001_R1_001.fastq.gz	E0545.2.OraM1.S23	E0545-2-OraM1	AAMP10	AAMP10-2-OraM1	MZW20791_1090.6.1_OraM1_S23_L001_R1_001.fastq.gz
MZW20791_1090.6.1_E0545_2_OraM1_S23_L001_R2_001.fastq.gz	E0545.2.OraM1.S23	E0545-2-OraM1	AAMP10	AAMP10-2-OraM1	MZW20791_1090.6.1_OraM1_S23_L001_R2_001.fastq.gz
MZW20791_1101.2.1_E0551_1_VagM1_S12_L001_R1_001.fastq.gz	E0551.1.VagM1.S12	E0551-1-VagM1	AAMP11	AAMP11-1-VagM1	MZW20791_1101.2.1_VagM1_S12_L001_R1_001.fastq.gz
MZW20791_1101.2.1_E0551_1_VagM1_S12_L001_R2_001.fastq.gz	E0551.1.VagM1.S12	E0551-1-VagM1	AAMP11	AAMP11-1-VagM1	MZW20791_1101.2.1_VagM1_S12_L001_R2_001.fastq.gz
MZW20791_1101.6.1_E0551_1_OraM1_S95_L001_R1_001.fastq.gz	E0551.1.OraM1.S95	E0551-1-OraM1	AAMP11	AAMP11-1-OraM1	MZW20791_1101.6.1_OraM1_S95_L001_R1_001.fastq.gz
MZW20791_1101.6.1_E0551_1_OraM1_S95_L001_R2_001.fastq.gz	E0551.1.OraM1.S95	E0551-1-OraM1	AAMP11	AAMP11-1-OraM1	MZW20791_1101.6.1_OraM1_S95_L001_R2_001.fastq.gz
MZW20791_1101.8.1_E0551_1_RecM1_S24_L001_R1_001.fastq.gz	E0551.1.RecM1.S24	E0551-1-RecM1	AAMP11	AAMP11-1-RecM1	MZW20791_1101.8.1_RecM1_S24_L001_R1_001.fastq.gz
MZW20791_1101.8.1_E0551_1_RecM1_S24_L001_R2_001.fastq.gz	E0551.1.RecM1.S24	E0551-1-RecM1	AAMP11	AAMP11-1-RecM1	MZW20791_1101.8.1_RecM1_S24_L001_R2_001.fastq.gz
MZW20791_1102.2.1_E0551_2_VagM1_S48_L001_R1_001.fastq.gz	E0551.2.VagM1.S48	E0551-2-VagM1	AAMP11	AAMP11-2-VagM1	MZW20791_1102.2.1_VagM1_S48_L001_R1_001.fastq.gz
MZW20791_1102.2.1_E0551_2_VagM1_S48_L001_R2_001.fastq.gz	E0551.2.VagM1.S48	E0551-2-VagM1	AAMP11	AAMP11-2-VagM1	MZW20791_1102.2.1_VagM1_S48_L001_R2_001.fastq.gz
MZW20791_1102.6.1_E0551_2_OraM1_S36_L001_R1_001.fastq.gz	E0551.2.OraM1.S36	E0551-2-OraM1	AAMP11	AAMP11-2-OraM1	MZW20791_1102.6.1_OraM1_S36_L001_R1_001.fastq.gz
MZW20791_1102.6.1_E0551_2_OraM1_S36_L001_R2_001.fastq.gz	E0551.2.OraM1.S36	E0551-2-OraM1	AAMP11	AAMP11-2-OraM1	MZW20791_1102.6.1_OraM1_S36_L001_R2_001.fastq.gz
MZW20791_1102.8.1_E0551_2_RecM1_S60_L001_R1_001.fastq.gz	E0551.2.RecM1.S60	E0551-2-RecM1	AAMP11	AAMP11-2-RecM1	MZW20791_1102.8.1_RecM1_S60_L001_R1_001.fastq.gz
MZW20791_1102.8.1_E0551_2_RecM1_S60_L001_R2_001.fastq.gz	E0551.2.RecM1.S60	E0551-2-RecM1	AAMP11	AAMP11-2-RecM1	MZW20791_1102.8.1_RecM1_S60_L001_R2_001.fastq.gz
MZW20791_1105.2.1_E0553_1_VagM1_S78_L001_R1_001.fastq.gz	E0553.1.VagM1.S78	E0553-1-VagM1	AAMP12	AAMP12-1-VagM1	MZW20791_1105.2.1_VagM1_S78_L001_R1_001.fastq.gz
MZW20791_1105.2.1_E0553_1_VagM1_S78_L001_R2_001.fastq.gz	E0553.1.VagM1.S78	E0553-1-VagM1	AAMP12	AAMP12-1-VagM1	MZW20791_1105.2.1_VagM1_S78_L001_R2_001.fastq.gz
MZW20791_1105.6.1_E0553_1_OraM1_S66_L001_R1_001.fastq.gz	E0553.1.OraM1.S66	E0553-1-OraM1	AAMP12	AAMP12-1-OraM1	MZW20791_1105.6.1_OraM1_S66_L001_R1_001.fastq.gz
MZW20791_1105.6.1_E0553_1_OraM1_S66_L001_R2_001.fastq.gz	E0553.1.OraM1.S66	E0553-1-OraM1	AAMP12	AAMP12-1-OraM1	MZW20791_1105.6.1_OraM1_S66_L001_R2_001.fastq.gz
MZW20791_1106.2.1_E0553_2_VagM1_S81_L001_R1_001.fastq.gz	E0553.2.VagM1.S81	E0553-2-VagM1	AAMP12	AAMP12-2-VagM1	MZW20791_1106.2.1_VagM1_S81_L001_R1_001.fastq.gz
MZW20791_1106.2.1_E0553_2_VagM1_S81_L001_R2_001.fastq.gz	E0553.2.VagM1.S81	E0553-2-VagM1	AAMP12	AAMP12-2-VagM1	MZW20791_1106.2.1_VagM1_S81_L001_R2_001.fastq.gz
MZW20791_1106.6.1_E0553_2_OraM1_S69_L001_R1_001.fastq.gz	E0553.2.OraM1.S69	E0553-2-OraM1	AAMP12	AAMP12-2-OraM1	MZW20791_1106.6.1_OraM1_S69_L001_R1_001.fastq.gz
MZW20791_1106.6.1_E0553_2_OraM1_S69_L001_R2_001.fastq.gz	E0553.2.OraM1.S69	E0553-2-OraM1	AAMP12	AAMP12-2-OraM1	MZW20791_1106.6.1_OraM1_S69_L001_R2_001.fastq.gz
MZW20791_1107.8.1_E0554_1_RecM1_S1_L001_R1_001.fastq.gz	E0554.1.RecM1.S1	E0554-1-RecM1	AAMP13	AAMP13-1-RecM1	MZW20791_1107.8.1_RecM1_S1_L001_R1_001.fastq.gz
MZW20791_1107.8.1_E0554_1_RecM1_S1_L001_R2_001.fastq.gz	E0554.1.RecM1.S1	E0554-1-RecM1	AAMP13	AAMP13-1-RecM1	MZW20791_1107.8.1_RecM1_S1_L001_R2_001.fastq.gz
MZW20791_1108.8.1_E0554_2_RecM1_S37_L001_R1_001.fastq.gz	E0554.2.RecM1.S37	E0554-2-RecM1	AAMP13	AAMP13-2-RecM1	MZW20791_1108.8.1_RecM1_S37_L001_R1_001.fastq.gz
MZW20791_1108.8.1_E0554_2_RecM1_S37_L001_R2_001.fastq.gz	E0554.2.RecM1.S37	E0554-2-RecM1	AAMP13	AAMP13-2-RecM1	MZW20791_1108.8.1_RecM1_S37_L001_R2_001.fastq.gz
MZW20791_1117.2.1_E0559_1_VagM1_S15_L001_R1_001.fastq.gz	E0559.1.VagM1.S15	E0559-1-VagM1	AAMP14	AAMP14-1-VagM1	MZW20791_1117.2.1_VagM1_S15_L001_R1_001.fastq.gz
MZW20791_1117.2.1_E0559_1_VagM1_S15_L001_R2_001.fastq.gz	E0559.1.VagM1.S15	E0559-1-VagM1	AAMP14	AAMP14-1-VagM1	MZW20791_1117.2.1_VagM1_S15_L001_R2_001.fastq.gz
MZW20791_1117.6.1_E0559_1_OraM1_S3_L001_R1_001.fastq.gz	E0559.1.OraM1.S3	E0559-1-OraM1	AAMP14	AAMP14-1-OraM1	MZW20791_1117.6.1_OraM1_S3_L001_R1_001.fastq.gz
MZW20791_1117.6.1_E0559_1_OraM1_S3_L001_R2_001.fastq.gz	E0559.1.OraM1.S3	E0559-1-OraM1	AAMP14	AAMP14-1-OraM1	MZW20791_1117.6.1_OraM1_S3_L001_R2_001.fastq.gz
MZW20791_1118.2.1_E0559_2_VagM1_S51_L001_R1_001.fastq.gz	E0559.2.VagM1.S51	E0559-2-VagM1	AAMP14	AAMP14-2-VagM1	MZW20791_1118.2.1_VagM1_S51_L001_R1_001.fastq.gz
MZW20791_1118.2.1_E0559_2_VagM1_S51_L001_R2_001.fastq.gz	E0559.2.VagM1.S51	E0559-2-VagM1	AAMP14	AAMP14-2-VagM1	MZW20791_1118.2.1_VagM1_S51_L001_R2_001.fastq.gz
MZW20791_1118.6.1_E0559_2_OraM1_S39_L001_R1_001.fastq.gz	E0559.2.OraM1.S39	E0559-2-OraM1	AAMP14	AAMP14-2-OraM1	MZW20791_1118.6.1_OraM1_S39_L001_R1_001.fastq.gz
MZW20791_1118.6.1_E0559_2_OraM1_S39_L001_R2_001.fastq.gz	E0559.2.OraM1.S39	E0559-2-OraM1	AAMP14	AAMP14-2-OraM1	MZW20791_1118.6.1_OraM1_S39_L001_R2_001.fastq.gz
MZW20791_1121.2.1_E0561_1_VagM1_S28_L001_R1_001.fastq.gz	E0561.1.VagM1.S28	E0561-1-VagM1	AAMP15	AAMP15-1-VagM1	MZW20791_1121.2.1_VagM1_S28_L001_R1_001.fastq.gz
MZW20791_1121.2.1_E0561_1_VagM1_S28_L001_R2_001.fastq.gz	E0561.1.VagM1.S28	E0561-1-VagM1	AAMP15	AAMP15-1-VagM1	MZW20791_1121.2.1_VagM1_S28_L001_R2_001.fastq.gz
MZW20791_1121.6.1_E0561_1_OraM1_S16_L001_R1_001.fastq.gz	E0561.1.OraM1.S16	E0561-1-OraM1	AAMP15	AAMP15-1-OraM1	MZW20791_1121.6.1_OraM1_S16_L001_R1_001.fastq.gz
MZW20791_1121.6.1_E0561_1_OraM1_S16_L001_R2_001.fastq.gz	E0561.1.OraM1.S16	E0561-1-OraM1	AAMP15	AAMP15-1-OraM1	MZW20791_1121.6.1_OraM1_S16_L001_R2_001.fastq.gz
MZW20791_1122.2.1_E0561_2_VagM1_S64_L001_R1_001.fastq.gz	E0561.2.VagM1.S64	E0561-2-VagM1	AAMP15	AAMP15-2-VagM1	MZW20791_1122.2.1_VagM1_S64_L001_R1_001.fastq.gz
MZW20791_1122.2.1_E0561_2_VagM1_S64_L001_R2_001.fastq.gz	E0561.2.VagM1.S64	E0561-2-VagM1	AAMP15	AAMP15-2-VagM1	MZW20791_1122.2.1_VagM1_S64_L001_R2_001.fastq.gz
MZW20791_1122.6.1_E0561_2_OraM1_S52_L001_R1_001.fastq.gz	E0561.2.OraM1.S52	E0561-2-OraM1	AAMP15	AAMP15-2-OraM1	MZW20791_1122.6.1_OraM1_S52_L001_R1_001.fastq.gz
MZW20791_1122.6.1_E0561_2_OraM1_S52_L001_R2_001.fastq.gz	E0561.2.OraM1.S52	E0561-2-OraM1	AAMP15	AAMP15-2-OraM1	MZW20791_1122.6.1_OraM1_S52_L001_R2_001.fastq.gz
MZW20791_1123.2.1_E0562_1_VagM1_S17_L001_R1_001.fastq.gz	E0562.1.VagM1.S17	E0562-1-VagM1	AAMP16	AAMP16-1-VagM1	MZW20791_1123.2.1_VagM1_S17_L001_R1_001.fastq.gz
MZW20791_1123.2.1_E0562_1_VagM1_S17_L001_R2_001.fastq.gz	E0562.1.VagM1.S17	E0562-1-VagM1	AAMP16	AAMP16-1-VagM1	MZW20791_1123.2.1_VagM1_S17_L001_R2_001.fastq.gz
MZW20791_1123.6.1_E0562_1_OraM1_S5_L001_R1_001.fastq.gz	E0562.1.OraM1.S5	E0562-1-OraM1	AAMP16	AAMP16-1-OraM1	MZW20791_1123.6.1_OraM1_S5_L001_R1_001.fastq.gz
MZW20791_1123.6.1_E0562_1_OraM1_S5_L001_R2_001.fastq.gz	E0562.1.OraM1.S5	E0562-1-OraM1	AAMP16	AAMP16-1-OraM1	MZW20791_1123.6.1_OraM1_S5_L001_R2_001.fastq.gz
MZW20791_1123.8.1_E0562_1_RecM1_S29_L001_R1_001.fastq.gz	E0562.1.RecM1.S29	E0562-1-RecM1	AAMP16	AAMP16-1-RecM1	MZW20791_1123.8.1_RecM1_S29_L001_R1_001.fastq.gz
MZW20791_1123.8.1_E0562_1_RecM1_S29_L001_R2_001.fastq.gz	E0562.1.RecM1.S29	E0562-1-RecM1	AAMP16	AAMP16-1-RecM1	MZW20791_1123.8.1_RecM1_S29_L001_R2_001.fastq.gz
MZW20791_1124.2.1_E0562_2_VagM1_S53_L001_R1_001.fastq.gz	E0562.2.VagM1.S53	E0562-2-VagM1	AAMP16	AAMP16-2-VagM1	MZW20791_1124.2.1_VagM1_S53_L001_R1_001.fastq.gz
MZW20791_1124.2.1_E0562_2_VagM1_S53_L001_R2_001.fastq.gz	E0562.2.VagM1.S53	E0562-2-VagM1	AAMP16	AAMP16-2-VagM1	MZW20791_1124.2.1_VagM1_S53_L001_R2_001.fastq.gz
MZW20791_1124.6.1_E0562_2_OraM1_S41_L001_R1_001.fastq.gz	E0562.2.OraM1.S41	E0562-2-OraM1	AAMP16	AAMP16-2-OraM1	MZW20791_1124.6.1_OraM1_S41_L001_R1_001.fastq.gz
MZW20791_1124.6.1_E0562_2_OraM1_S41_L001_R2_001.fastq.gz	E0562.2.OraM1.S41	E0562-2-OraM1	AAMP16	AAMP16-2-OraM1	MZW20791_1124.6.1_OraM1_S41_L001_R2_001.fastq.gz
MZW20791_1124.8.1_E0562_2_RecM1_S65_L001_R1_001.fastq.gz	E0562.2.RecM1.S65	E0562-2-RecM1	AAMP16	AAMP16-2-RecM1	MZW20791_1124.8.1_RecM1_S65_L001_R1_001.fastq.gz
MZW20791_1124.8.1_E0562_2_RecM1_S65_L001_R2_001.fastq.gz	E0562.2.RecM1.S65	E0562-2-RecM1	AAMP16	AAMP16-2-RecM1	MZW20791_1124.8.1_RecM1_S65_L001_R2_001.fastq.gz
MZW20791_1125.2.1_E0563_1_VagM1_S18_L001_R1_001.fastq.gz	E0563.1.VagM1.S18	E0563-1-VagM1	AAMP17	AAMP17-1-VagM1	MZW20791_1125.2.1_VagM1_S18_L001_R1_001.fastq.gz
MZW20791_1125.2.1_E0563_1_VagM1_S18_L001_R2_001.fastq.gz	E0563.1.VagM1.S18	E0563-1-VagM1	AAMP17	AAMP17-1-VagM1	MZW20791_1125.2.1_VagM1_S18_L001_R2_001.fastq.gz
MZW20791_1125.6.1_E0563_1_OraM1_S6_L001_R1_001.fastq.gz	E0563.1.OraM1.S6	E0563-1-OraM1	AAMP17	AAMP17-1-OraM1	MZW20791_1125.6.1_OraM1_S6_L001_R1_001.fastq.gz
MZW20791_1125.6.1_E0563_1_OraM1_S6_L001_R2_001.fastq.gz	E0563.1.OraM1.S6	E0563-1-OraM1	AAMP17	AAMP17-1-OraM1	MZW20791_1125.6.1_OraM1_S6_L001_R2_001.fastq.gz
MZW20791_1126.2.1_E0563_2_OraM1_S42_L001_R1_001.fastq.gz	E0563.2.OraM1.S42	E0563-2-OraM1	AAMP17	AAMP17-2-OraM1	MZW20791_1126.2.1_OraM1_S42_L001_R1_001.fastq.gz
MZW20791_1126.2.1_E0563_2_OraM1_S42_L001_R2_001.fastq.gz	E0563.2.OraM1.S42	E0563-2-OraM1	AAMP17	AAMP17-2-OraM1	MZW20791_1126.2.1_OraM1_S42_L001_R2_001.fastq.gz
MZW20791_1126.6.1_E0563_2_VagM1_S54_L001_R1_001.fastq.gz	E0563.2.VagM1.S54	E0563-2-VagM1	AAMP17	AAMP17-2-VagM1	MZW20791_1126.6.1_VagM1_S54_L001_R1_001.fastq.gz
MZW20791_1126.6.1_E0563_2_VagM1_S54_L001_R2_001.fastq.gz	E0563.2.VagM1.S54	E0563-2-VagM1	AAMP17	AAMP17-2-VagM1	MZW20791_1126.6.1_VagM1_S54_L001_R2_001.fastq.gz
MZW20791_1129.2.1_E0565_1_VagM1_S31_L001_R1_001.fastq.gz	E0565.1.VagM1.S31	E0565-1-VagM1	AAMP18	AAMP18-1-VagM1	MZW20791_1129.2.1_VagM1_S31_L001_R1_001.fastq.gz
MZW20791_1129.2.1_E0565_1_VagM1_S31_L001_R2_001.fastq.gz	E0565.1.VagM1.S31	E0565-1-VagM1	AAMP18	AAMP18-1-VagM1	MZW20791_1129.2.1_VagM1_S31_L001_R2_001.fastq.gz
MZW20791_1129.6.1_E0565_1_OraM1_S19_L001_R1_001.fastq.gz	E0565.1.OraM1.S19	E0565-1-OraM1	AAMP18	AAMP18-1-OraM1	MZW20791_1129.6.1_OraM1_S19_L001_R1_001.fastq.gz
MZW20791_1129.6.1_E0565_1_OraM1_S19_L001_R2_001.fastq.gz	E0565.1.OraM1.S19	E0565-1-OraM1	AAMP18	AAMP18-1-OraM1	MZW20791_1129.6.1_OraM1_S19_L001_R2_001.fastq.gz
MZW20791_1130.2.1_E0565_2_VagM1_S67_L001_R1_001.fastq.gz	E0565.2.VagM1.S67	E0565-2-VagM1	AAMP18	AAMP18-2-VagM1	MZW20791_1130.2.1_VagM1_S67_L001_R1_001.fastq.gz
MZW20791_1130.2.1_E0565_2_VagM1_S67_L001_R2_001.fastq.gz	E0565.2.VagM1.S67	E0565-2-VagM1	AAMP18	AAMP18-2-VagM1	MZW20791_1130.2.1_VagM1_S67_L001_R2_001.fastq.gz
MZW20791_1130.6.1_E0565_2_OraM1_S55_L001_R1_001.fastq.gz	E0565.2.OraM1.S55	E0565-2-OraM1	AAMP18	AAMP18-2-OraM1	MZW20791_1130.6.1_OraM1_S55_L001_R1_001.fastq.gz
MZW20791_1130.6.1_E0565_2_OraM1_S55_L001_R2_001.fastq.gz	E0565.2.OraM1.S55	E0565-2-OraM1	AAMP18	AAMP18-2-OraM1	MZW20791_1130.6.1_OraM1_S55_L001_R2_001.fastq.gz
MZW20791_1131.2.1_E0566_1_OraM1_S8_L001_R1_001.fastq.gz	E0566.1.OraM1.S8	E0566-1-OraM1	AAMP19	AAMP19-1-OraM1	MZW20791_1131.2.1_OraM1_S8_L001_R1_001.fastq.gz
MZW20791_1131.2.1_E0566_1_OraM1_S8_L001_R2_001.fastq.gz	E0566.1.OraM1.S8	E0566-1-OraM1	AAMP19	AAMP19-1-OraM1	MZW20791_1131.2.1_OraM1_S8_L001_R2_001.fastq.gz
MZW20791_1131.6.1_E0566_1_VagM1_S20_L001_R1_001.fastq.gz	E0566.1.VagM1.S20	E0566-1-VagM1	AAMP19	AAMP19-1-VagM1	MZW20791_1131.6.1_VagM1_S20_L001_R1_001.fastq.gz
MZW20791_1131.6.1_E0566_1_VagM1_S20_L001_R2_001.fastq.gz	E0566.1.VagM1.S20	E0566-1-VagM1	AAMP19	AAMP19-1-VagM1	MZW20791_1131.6.1_VagM1_S20_L001_R2_001.fastq.gz
MZW20791_1132.2.1_E0566_2_VagM1_S56_L001_R1_001.fastq.gz	E0566.2.VagM1.S56	E0566-2-VagM1	AAMP19	AAMP19-2-VagM1	MZW20791_1132.2.1_VagM1_S56_L001_R1_001.fastq.gz
MZW20791_1132.2.1_E0566_2_VagM1_S56_L001_R2_001.fastq.gz	E0566.2.VagM1.S56	E0566-2-VagM1	AAMP19	AAMP19-2-VagM1	MZW20791_1132.2.1_VagM1_S56_L001_R2_001.fastq.gz
MZW20791_1132.6.1_E0566_2_OraM1_S44_L001_R1_001.fastq.gz	E0566.2.OraM1.S44	E0566-2-OraM1	AAMP19	AAMP19-2-OraM1	MZW20791_1132.6.1_OraM1_S44_L001_R1_001.fastq.gz
MZW20791_1132.6.1_E0566_2_OraM1_S44_L001_R2_001.fastq.gz	E0566.2.OraM1.S44	E0566-2-OraM1	AAMP19	AAMP19-2-OraM1	MZW20791_1132.6.1_OraM1_S44_L001_R2_001.fastq.gz
MZW20791_1133.2.1_E0567_1_VagM1_S21_L001_R1_001.fastq.gz	E0567.1.VagM1.S21	E0567-1-VagM1	AAMP20	AAMP20-1-VagM1	MZW20791_1133.2.1_VagM1_S21_L001_R1_001.fastq.gz
MZW20791_1133.2.1_E0567_1_VagM1_S21_L001_R2_001.fastq.gz	E0567.1.VagM1.S21	E0567-1-VagM1	AAMP20	AAMP20-1-VagM1	MZW20791_1133.2.1_VagM1_S21_L001_R2_001.fastq.gz
MZW20791_1133.6.1_E0567_1_OraM1_S9_L001_R1_001.fastq.gz	E0567.1.OraM1.S9	E0567-1-OraM1	AAMP20	AAMP20-1-OraM1	MZW20791_1133.6.1_OraM1_S9_L001_R1_001.fastq.gz
MZW20791_1133.6.1_E0567_1_OraM1_S9_L001_R2_001.fastq.gz	E0567.1.OraM1.S9	E0567-1-OraM1	AAMP20	AAMP20-1-OraM1	MZW20791_1133.6.1_OraM1_S9_L001_R2_001.fastq.gz
MZW20791_1133.8.1_E0567_1_RecM1_S33_L001_R1_001.fastq.gz	E0567.1.RecM1.S33	E0567-1-RecM1	AAMP20	AAMP20-1-RecM1	MZW20791_1133.8.1_RecM1_S33_L001_R1_001.fastq.gz
MZW20791_1133.8.1_E0567_1_RecM1_S33_L001_R2_001.fastq.gz	E0567.1.RecM1.S33	E0567-1-RecM1	AAMP20	AAMP20-1-RecM1	MZW20791_1133.8.1_RecM1_S33_L001_R2_001.fastq.gz
MZW20791_1134.2.1_E0567_2_VagM1_S57_L001_R1_001.fastq.gz	E0567.2.VagM1.S57	E0567-2-VagM1	AAMP20	AAMP20-2-VagM1	MZW20791_1134.2.1_VagM1_S57_L001_R1_001.fastq.gz
MZW20791_1134.2.1_E0567_2_VagM1_S57_L001_R2_001.fastq.gz	E0567.2.VagM1.S57	E0567-2-VagM1	AAMP20	AAMP20-2-VagM1	MZW20791_1134.2.1_VagM1_S57_L001_R2_001.fastq.gz
MZW20791_1134.6.1_E0567_2_OraM1_S45_L001_R1_001.fastq.gz	E0567.2.OraM1.S45	E0567-2-OraM1	AAMP20	AAMP20-2-OraM1	MZW20791_1134.6.1_OraM1_S45_L001_R1_001.fastq.gz
MZW20791_1134.6.1_E0567_2_OraM1_S45_L001_R2_001.fastq.gz	E0567.2.OraM1.S45	E0567-2-OraM1	AAMP20	AAMP20-2-OraM1	MZW20791_1134.6.1_OraM1_S45_L001_R2_001.fastq.gz
MZW20791_1134.8.1_E0567_2_RecM1_S69_L001_R1_001.fastq.gz	E0567.2.RecM1.S69	E0567-2-RecM1	AAMP20	AAMP20-2-RecM1	MZW20791_1134.8.1_RecM1_S69_L001_R1_001.fastq.gz
MZW20791_1134.8.1_E0567_2_RecM1_S69_L001_R2_001.fastq.gz	E0567.2.RecM1.S69	E0567-2-RecM1	AAMP20	AAMP20-2-RecM1	MZW20791_1134.8.1_RecM1_S69_L001_R2_001.fastq.gz
MZW20791_1135.2.1_E0568_1_VagM1_S93_L001_R1_001.fastq.gz	E0568.1.VagM1.S93	E0568-1-VagM1	AAMP21	AAMP21-1-VagM1	MZW20791_1135.2.1_VagM1_S93_L001_R1_001.fastq.gz
MZW20791_1135.2.1_E0568_1_VagM1_S93_L001_R2_001.fastq.gz	E0568.1.VagM1.S93	E0568-1-VagM1	AAMP21	AAMP21-1-VagM1	MZW20791_1135.2.1_VagM1_S93_L001_R2_001.fastq.gz
MZW20791_1135.6.1_E0568_1_OraM1_S81_L001_R1_001.fastq.gz	E0568.1.OraM1.S81	E0568-1-OraM1	AAMP21	AAMP21-1-OraM1	MZW20791_1135.6.1_OraM1_S81_L001_R1_001.fastq.gz
MZW20791_1135.6.1_E0568_1_OraM1_S81_L001_R2_001.fastq.gz	E0568.1.OraM1.S81	E0568-1-OraM1	AAMP21	AAMP21-1-OraM1	MZW20791_1135.6.1_OraM1_S81_L001_R2_001.fastq.gz
MZW20791_1135.8.1_E0568_1_RecM1_S10_L001_R1_001.fastq.gz	E0568.1.RecM1.S10	E0568-1-RecM1	AAMP21	AAMP21-1-RecM1	MZW20791_1135.8.1_RecM1_S10_L001_R1_001.fastq.gz
MZW20791_1135.8.1_E0568_1_RecM1_S10_L001_R2_001.fastq.gz	E0568.1.RecM1.S10	E0568-1-RecM1	AAMP21	AAMP21-1-RecM1	MZW20791_1135.8.1_RecM1_S10_L001_R2_001.fastq.gz
MZW20791_1136.2.1_E0568_2_VagM1_S34_L001_R1_001.fastq.gz	E0568.2.VagM1.S34	E0568-2-VagM1	AAMP21	AAMP21-2-VagM1	MZW20791_1136.2.1_VagM1_S34_L001_R1_001.fastq.gz
MZW20791_1136.2.1_E0568_2_VagM1_S34_L001_R2_001.fastq.gz	E0568.2.VagM1.S34	E0568-2-VagM1	AAMP21	AAMP21-2-VagM1	MZW20791_1136.2.1_VagM1_S34_L001_R2_001.fastq.gz
MZW20791_1136.6.1_E0568_2_OraM1_S22_L001_R1_001.fastq.gz	E0568.2.OraM1.S22	E0568-2-OraM1	AAMP21	AAMP21-2-OraM1	MZW20791_1136.6.1_OraM1_S22_L001_R1_001.fastq.gz
MZW20791_1136.6.1_E0568_2_OraM1_S22_L001_R2_001.fastq.gz	E0568.2.OraM1.S22	E0568-2-OraM1	AAMP21	AAMP21-2-OraM1	MZW20791_1136.6.1_OraM1_S22_L001_R2_001.fastq.gz
MZW20791_1136.8.1_E0568_2_RecM1_S46_L001_R1_001.fastq.gz	E0568.2.RecM1.S46	E0568-2-RecM1	AAMP21	AAMP21-2-RecM1	MZW20791_1136.8.1_RecM1_S46_L001_R1_001.fastq.gz
MZW20791_1136.8.1_E0568_2_RecM1_S46_L001_R2_001.fastq.gz	E0568.2.RecM1.S46	E0568-2-RecM1	AAMP21	AAMP21-2-RecM1	MZW20791_1136.8.1_RecM1_S46_L001_R2_001.fastq.gz
MZW20791_1137.2.1_E0569_1_VagM1_S70_L001_R1_001.fastq.gz	E0569.1.VagM1.S70	E0569-1-VagM1	AAMP22	AAMP22-1-VagM1	MZW20791_1137.2.1_VagM1_S70_L001_R1_001.fastq.gz
MZW20791_1137.2.1_E0569_1_VagM1_S70_L001_R2_001.fastq.gz	E0569.1.VagM1.S70	E0569-1-VagM1	AAMP22	AAMP22-1-VagM1	MZW20791_1137.2.1_VagM1_S70_L001_R2_001.fastq.gz
MZW20791_1137.6.1_E0569_1_OraM1_S58_L001_R1_001.fastq.gz	E0569.1.OraM1.S58	E0569-1-OraM1	AAMP22	AAMP22-1-OraM1	MZW20791_1137.6.1_OraM1_S58_L001_R1_001.fastq.gz
MZW20791_1137.6.1_E0569_1_OraM1_S58_L001_R2_001.fastq.gz	E0569.1.OraM1.S58	E0569-1-OraM1	AAMP22	AAMP22-1-OraM1	MZW20791_1137.6.1_OraM1_S58_L001_R2_001.fastq.gz
MZW20791_1137.8.1_E0569_1_RecM1_S82_L001_R1_001.fastq.gz	E0569.1.RecM1.S82	E0569-1-RecM1	AAMP22	AAMP22-1-RecM1	MZW20791_1137.8.1_RecM1_S82_L001_R1_001.fastq.gz
MZW20791_1137.8.1_E0569_1_RecM1_S82_L001_R2_001.fastq.gz	E0569.1.RecM1.S82	E0569-1-RecM1	AAMP22	AAMP22-1-RecM1	MZW20791_1137.8.1_RecM1_S82_L001_R2_001.fastq.gz
MZW20791_1138.2.1_E0569_2_VagM1_S11_L001_R1_001.fastq.gz	E0569.2.VagM1.S11	E0569-2-VagM1	AAMP22	AAMP22-2-VagM1	MZW20791_1138.2.1_VagM1_S11_L001_R1_001.fastq.gz
MZW20791_1138.2.1_E0569_2_VagM1_S11_L001_R2_001.fastq.gz	E0569.2.VagM1.S11	E0569-2-VagM1	AAMP22	AAMP22-2-VagM1	MZW20791_1138.2.1_VagM1_S11_L001_R2_001.fastq.gz
MZW20791_1138.6.1_E0569_2_OraM1_S94_L001_R1_001.fastq.gz	E0569.2.OraM1.S94	E0569-2-OraM1	AAMP22	AAMP22-2-OraM1	MZW20791_1138.6.1_OraM1_S94_L001_R1_001.fastq.gz
MZW20791_1138.6.1_E0569_2_OraM1_S94_L001_R2_001.fastq.gz	E0569.2.OraM1.S94	E0569-2-OraM1	AAMP22	AAMP22-2-OraM1	MZW20791_1138.6.1_OraM1_S94_L001_R2_001.fastq.gz
MZW20791_1138.8.1_E0569_2_RecM1_S23_L001_R1_001.fastq.gz	E0569.2.RecM1.S23	E0569-2-RecM1	AAMP22	AAMP22-2-RecM1	MZW20791_1138.8.1_RecM1_S23_L001_R1_001.fastq.gz
MZW20791_1138.8.1_E0569_2_RecM1_S23_L001_R2_001.fastq.gz	E0569.2.RecM1.S23	E0569-2-RecM1	AAMP22	AAMP22-2-RecM1	MZW20791_1138.8.1_RecM1_S23_L001_R2_001.fastq.gz
MZW20791_1139.2.1_E0570_1_VagM1_S47_L001_R1_001.fastq.gz	E0570.1.VagM1.S47	E0570-1-VagM1	AAMP23	AAMP23-1-VagM1	MZW20791_1139.2.1_VagM1_S47_L001_R1_001.fastq.gz
MZW20791_1139.2.1_E0570_1_VagM1_S47_L001_R2_001.fastq.gz	E0570.1.VagM1.S47	E0570-1-VagM1	AAMP23	AAMP23-1-VagM1	MZW20791_1139.2.1_VagM1_S47_L001_R2_001.fastq.gz
MZW20791_1139.6.1_E0570_1_OraM1_S35_L001_R1_001.fastq.gz	E0570.1.OraM1.S35	E0570-1-OraM1	AAMP23	AAMP23-1-OraM1	MZW20791_1139.6.1_OraM1_S35_L001_R1_001.fastq.gz
MZW20791_1139.6.1_E0570_1_OraM1_S35_L001_R2_001.fastq.gz	E0570.1.OraM1.S35	E0570-1-OraM1	AAMP23	AAMP23-1-OraM1	MZW20791_1139.6.1_OraM1_S35_L001_R2_001.fastq.gz
MZW20791_1140.2.1_E0570_2_VagM1_S83_L001_R1_001.fastq.gz	E0570.2.VagM1.S83	E0570-2-VagM1	AAMP23	AAMP23-2-VagM1	MZW20791_1140.2.1_VagM1_S83_L001_R1_001.fastq.gz
MZW20791_1140.2.1_E0570_2_VagM1_S83_L001_R2_001.fastq.gz	E0570.2.VagM1.S83	E0570-2-VagM1	AAMP23	AAMP23-2-VagM1	MZW20791_1140.2.1_VagM1_S83_L001_R2_001.fastq.gz
MZW20791_1140.6.1_E0570_2_OraM1_S71_L001_R1_001.fastq.gz	E0570.2.OraM1.S71	E0570-2-OraM1	AAMP23	AAMP23-2-OraM1	MZW20791_1140.6.1_OraM1_S71_L001_R1_001.fastq.gz
MZW20791_1140.6.1_E0570_2_OraM1_S71_L001_R2_001.fastq.gz	E0570.2.OraM1.S71	E0570-2-OraM1	AAMP23	AAMP23-2-OraM1	MZW20791_1140.6.1_OraM1_S71_L001_R2_001.fastq.gz
MZW20791_1141.2.1_E0571_1_VagM1_S24_L001_R1_001.fastq.gz	E0571.1.VagM1.S24	E0571-1-VagM1	AAMP24	AAMP24-1-VagM1	MZW20791_1141.2.1_VagM1_S24_L001_R1_001.fastq.gz
MZW20791_1141.2.1_E0571_1_VagM1_S24_L001_R2_001.fastq.gz	E0571.1.VagM1.S24	E0571-1-VagM1	AAMP24	AAMP24-1-VagM1	MZW20791_1141.2.1_VagM1_S24_L001_R2_001.fastq.gz
MZW20791_1141.6.1_E0571_1_OraM1_S12_L001_R1_001.fastq.gz	E0571.1.OraM1.S12	E0571-1-OraM1	AAMP24	AAMP24-1-OraM1	MZW20791_1141.6.1_OraM1_S12_L001_R1_001.fastq.gz
MZW20791_1141.6.1_E0571_1_OraM1_S12_L001_R2_001.fastq.gz	E0571.1.OraM1.S12	E0571-1-OraM1	AAMP24	AAMP24-1-OraM1	MZW20791_1141.6.1_OraM1_S12_L001_R2_001.fastq.gz
MZW20791_1142.2.1_E0571_2_VagM1_S60_L001_R1_001.fastq.gz	E0571.2.VagM1.S60	E0571-2-VagM1	AAMP24	AAMP24-2-VagM1	MZW20791_1142.2.1_VagM1_S60_L001_R1_001.fastq.gz
MZW20791_1142.2.1_E0571_2_VagM1_S60_L001_R2_001.fastq.gz	E0571.2.VagM1.S60	E0571-2-VagM1	AAMP24	AAMP24-2-VagM1	MZW20791_1142.2.1_VagM1_S60_L001_R2_001.fastq.gz
MZW20791_1142.6.1_E0571_2_OraM1_S48_L001_R1_001.fastq.gz	E0571.2.OraM1.S48	E0571-2-OraM1	AAMP24	AAMP24-2-OraM1	MZW20791_1142.6.1_OraM1_S48_L001_R1_001.fastq.gz
MZW20791_1142.6.1_E0571_2_OraM1_S48_L001_R2_001.fastq.gz	E0571.2.OraM1.S48	E0571-2-OraM1	AAMP24	AAMP24-2-OraM1	MZW20791_1142.6.1_OraM1_S48_L001_R2_001.fastq.gz
MZW20791_1143.2.1_E0572_1_VagM1_S96_L001_R1_001.fastq.gz	E0572.1.VagM1.S96	E0572-1-VagM1	AAMP25	AAMP25-1-VagM1	MZW20791_1143.2.1_VagM1_S96_L001_R1_001.fastq.gz
MZW20791_1143.2.1_E0572_1_VagM1_S96_L001_R2_001.fastq.gz	E0572.1.VagM1.S96	E0572-1-VagM1	AAMP25	AAMP25-1-VagM1	MZW20791_1143.2.1_VagM1_S96_L001_R2_001.fastq.gz
MZW20791_1143.6.1_E0572_1_OraM1_S84_L001_R1_001.fastq.gz	E0572.1.OraM1.S84	E0572-1-OraM1	AAMP25	AAMP25-1-OraM1	MZW20791_1143.6.1_OraM1_S84_L001_R1_001.fastq.gz
MZW20791_1143.6.1_E0572_1_OraM1_S84_L001_R2_001.fastq.gz	E0572.1.OraM1.S84	E0572-1-OraM1	AAMP25	AAMP25-1-OraM1	MZW20791_1143.6.1_OraM1_S84_L001_R2_001.fastq.gz
MZW20791_1143.8.1_E0572_1_RecM1_S50_L001_R1_001.fastq.gz	E0572.1.RecM1.S50	E0572-1-RecM1	AAMP25	AAMP25-1-RecM1	MZW20791_1143.8.1_RecM1_S50_L001_R1_001.fastq.gz
MZW20791_1143.8.1_E0572_1_RecM1_S50_L001_R2_001.fastq.gz	E0572.1.RecM1.S50	E0572-1-RecM1	AAMP25	AAMP25-1-RecM1	MZW20791_1143.8.1_RecM1_S50_L001_R2_001.fastq.gz
MZW20791_1144.2.1_E0572_2_VagM1_S74_L001_R1_001.fastq.gz	E0572.2.VagM1.S74	E0572-2-VagM1	AAMP25	AAMP25-2-VagM1	MZW20791_1144.2.1_VagM1_S74_L001_R1_001.fastq.gz
MZW20791_1144.2.1_E0572_2_VagM1_S74_L001_R2_001.fastq.gz	E0572.2.VagM1.S74	E0572-2-VagM1	AAMP25	AAMP25-2-VagM1	MZW20791_1144.2.1_VagM1_S74_L001_R2_001.fastq.gz
MZW20791_1144.6.1_E0572_2_OraM1_S62_L001_R1_001.fastq.gz	E0572.2.OraM1.S62	E0572-2-OraM1	AAMP25	AAMP25-2-OraM1	MZW20791_1144.6.1_OraM1_S62_L001_R1_001.fastq.gz
MZW20791_1144.6.1_E0572_2_OraM1_S62_L001_R2_001.fastq.gz	E0572.2.OraM1.S62	E0572-2-OraM1	AAMP25	AAMP25-2-OraM1	MZW20791_1144.6.1_OraM1_S62_L001_R2_001.fastq.gz
MZW20791_1144.8.1_E0572_2_RecM1_S86_L001_R1_001.fastq.gz	E0572.2.RecM1.S86	E0572-2-RecM1	AAMP25	AAMP25-2-RecM1	MZW20791_1144.8.1_RecM1_S86_L001_R1_001.fastq.gz
MZW20791_1144.8.1_E0572_2_RecM1_S86_L001_R2_001.fastq.gz	E0572.2.RecM1.S86	E0572-2-RecM1	AAMP25	AAMP25-2-RecM1	MZW20791_1144.8.1_RecM1_S86_L001_R2_001.fastq.gz
MZW20791_1147.2.1_E0574_1_VagM1_S89_L001_R1_001.fastq.gz	E0574.1.VagM1.S89	E0574-1-VagM1	AAMP26	AAMP26-1-VagM1	MZW20791_1147.2.1_VagM1_S89_L001_R1_001.fastq.gz
MZW20791_1147.2.1_E0574_1_VagM1_S89_L001_R2_001.fastq.gz	E0574.1.VagM1.S89	E0574-1-VagM1	AAMP26	AAMP26-1-VagM1	MZW20791_1147.2.1_VagM1_S89_L001_R2_001.fastq.gz
MZW20791_1147.6.1_E0574_1_OraM1_S77_L001_R1_001.fastq.gz	E0574.1.OraM1.S77	E0574-1-OraM1	AAMP26	AAMP26-1-OraM1	MZW20791_1147.6.1_OraM1_S77_L001_R1_001.fastq.gz
MZW20791_1147.6.1_E0574_1_OraM1_S77_L001_R2_001.fastq.gz	E0574.1.OraM1.S77	E0574-1-OraM1	AAMP26	AAMP26-1-OraM1	MZW20791_1147.6.1_OraM1_S77_L001_R2_001.fastq.gz
MZW20791_1147.8.1_E0574_1_RecM1_S66_L001_R1_001.fastq.gz	E0574.1.RecM1.S66	E0574-1-RecM1	AAMP26	AAMP26-1-RecM1	MZW20791_1147.8.1_RecM1_S66_L001_R1_001.fastq.gz
MZW20791_1147.8.1_E0574_1_RecM1_S66_L001_R2_001.fastq.gz	E0574.1.RecM1.S66	E0574-1-RecM1	AAMP26	AAMP26-1-RecM1	MZW20791_1147.8.1_RecM1_S66_L001_R2_001.fastq.gz
MZW20791_1148.2.1_E0574_2_VagM1_S90_L001_R1_001.fastq.gz	E0574.2.VagM1.S90	E0574-2-VagM1	AAMP26	AAMP26-2-VagM1	MZW20791_1148.2.1_VagM1_S90_L001_R1_001.fastq.gz
MZW20791_1148.2.1_E0574_2_VagM1_S90_L001_R2_001.fastq.gz	E0574.2.VagM1.S90	E0574-2-VagM1	AAMP26	AAMP26-2-VagM1	MZW20791_1148.2.1_VagM1_S90_L001_R2_001.fastq.gz
MZW20791_1148.6.1_E0574_2_OraM1_S78_L001_R1_001.fastq.gz	E0574.2.OraM1.S78	E0574-2-OraM1	AAMP26	AAMP26-2-OraM1	MZW20791_1148.6.1_OraM1_S78_L001_R1_001.fastq.gz
MZW20791_1148.6.1_E0574_2_OraM1_S78_L001_R2_001.fastq.gz	E0574.2.OraM1.S78	E0574-2-OraM1	AAMP26	AAMP26-2-OraM1	MZW20791_1148.6.1_OraM1_S78_L001_R2_001.fastq.gz
MZW20791_1148.8.1_E0574_2_RecM1_S80_L001_R1_001.fastq.gz	E0574.2.RecM1.S80	E0574-2-RecM1	AAMP26	AAMP26-2-RecM1	MZW20791_1148.8.1_RecM1_S80_L001_R1_001.fastq.gz
MZW20791_1148.8.1_E0574_2_RecM1_S80_L001_R2_001.fastq.gz	E0574.2.RecM1.S80	E0574-2-RecM1	AAMP26	AAMP26-2-RecM1	MZW20791_1148.8.1_RecM1_S80_L001_R2_001.fastq.gz
MZW20791_1149.2.1_E0575_1_VagM1_S87_L001_R1_001.fastq.gz	E0575.1.VagM1.S87	E0575-1-VagM1	AAMP27	AAMP27-1-VagM1	MZW20791_1149.2.1_VagM1_S87_L001_R1_001.fastq.gz
MZW20791_1149.2.1_E0575_1_VagM1_S87_L001_R2_001.fastq.gz	E0575.1.VagM1.S87	E0575-1-VagM1	AAMP27	AAMP27-1-VagM1	MZW20791_1149.2.1_VagM1_S87_L001_R2_001.fastq.gz
MZW20791_1149.6.1_E0575_1_OraM1_S75_L001_R1_001.fastq.gz	E0575.1.OraM1.S75	E0575-1-OraM1	AAMP27	AAMP27-1-OraM1	MZW20791_1149.6.1_OraM1_S75_L001_R1_001.fastq.gz
MZW20791_1149.6.1_E0575_1_OraM1_S75_L001_R2_001.fastq.gz	E0575.1.OraM1.S75	E0575-1-OraM1	AAMP27	AAMP27-1-OraM1	MZW20791_1149.6.1_OraM1_S75_L001_R2_001.fastq.gz
MZW20791_1149.8.1_E0575_1_RecM1_S78_L001_R1_001.fastq.gz	E0575.1.RecM1.S78	E0575-1-RecM1	AAMP27	AAMP27-1-RecM1	MZW20791_1149.8.1_RecM1_S78_L001_R1_001.fastq.gz
MZW20791_1149.8.1_E0575_1_RecM1_S78_L001_R2_001.fastq.gz	E0575.1.RecM1.S78	E0575-1-RecM1	AAMP27	AAMP27-1-RecM1	MZW20791_1149.8.1_RecM1_S78_L001_R2_001.fastq.gz
MZW20791_1150.2.1_E0575_2_VagM1_S90_L001_R1_001.fastq.gz	E0575.2.VagM1.S90	E0575-2-VagM1	AAMP27	AAMP27-2-VagM1	MZW20791_1150.2.1_VagM1_S90_L001_R1_001.fastq.gz
MZW20791_1150.2.1_E0575_2_VagM1_S90_L001_R2_001.fastq.gz	E0575.2.VagM1.S90	E0575-2-VagM1	AAMP27	AAMP27-2-VagM1	MZW20791_1150.2.1_VagM1_S90_L001_R2_001.fastq.gz
MZW20791_1150.6.1_E0575_2_OraM1_S69_L001_R1_001.fastq.gz	E0575.2.OraM1.S69	E0575-2-OraM1	AAMP27	AAMP27-2-OraM1	MZW20791_1150.6.1_OraM1_S69_L001_R1_001.fastq.gz
MZW20791_1150.6.1_E0575_2_OraM1_S69_L001_R2_001.fastq.gz	E0575.2.OraM1.S69	E0575-2-OraM1	AAMP27	AAMP27-2-OraM1	MZW20791_1150.6.1_OraM1_S69_L001_R2_001.fastq.gz
MZW20791_1150.8.1_E0575_2_RecM1_S81_L001_R1_001.fastq.gz	E0575.2.RecM1.S81	E0575-2-RecM1	AAMP27	AAMP27-2-RecM1	MZW20791_1150.8.1_RecM1_S81_L001_R1_001.fastq.gz
MZW20791_1150.8.1_E0575_2_RecM1_S81_L001_R2_001.fastq.gz	E0575.2.RecM1.S81	E0575-2-RecM1	AAMP27	AAMP27-2-RecM1	MZW20791_1150.8.1_RecM1_S81_L001_R2_001.fastq.gz
MZW20791_1151.8.1_E0576_1_RecM1_S63_L001_R1_001.fastq.gz	E0576.1.RecM1.S63	E0576-1-RecM1	AAMP28	AAMP28-1-RecM1	MZW20791_1151.8.1_RecM1_S63_L001_R1_001.fastq.gz
MZW20791_1151.8.1_E0576_1_RecM1_S63_L001_R2_001.fastq.gz	E0576.1.RecM1.S63	E0576-1-RecM1	AAMP28	AAMP28-1-RecM1	MZW20791_1151.8.1_RecM1_S63_L001_R2_001.fastq.gz
MZW20791_1152.8.1_E0576_2_RecM1_S78_L001_R1_001.fastq.gz	E0576.2.RecM1.S78	E0576-2-RecM1	AAMP28	AAMP28-2-RecM1	MZW20791_1152.8.1_RecM1_S78_L001_R1_001.fastq.gz
MZW20791_1152.8.1_E0576_2_RecM1_S78_L001_R2_001.fastq.gz	E0576.2.RecM1.S78	E0576-2-RecM1	AAMP28	AAMP28-2-RecM1	MZW20791_1152.8.1_RecM1_S78_L001_R2_001.fastq.gz
MZW20791_1155.2.1_E0578_1_VagM1_S57_L001_R1_001.fastq.gz	E0578.1.VagM1.S57	E0578-1-VagM1	AAMP29	AAMP29-1-VagM1	MZW20791_1155.2.1_VagM1_S57_L001_R1_001.fastq.gz
MZW20791_1155.2.1_E0578_1_VagM1_S57_L001_R2_001.fastq.gz	E0578.1.VagM1.S57	E0578-1-VagM1	AAMP29	AAMP29-1-VagM1	MZW20791_1155.2.1_VagM1_S57_L001_R2_001.fastq.gz
MZW20791_1155.6.1_E0578_1_OraM1_S90_L001_R1_001.fastq.gz	E0578.1.OraM1.S90	E0578-1-OraM1	AAMP29	AAMP29-1-OraM1	MZW20791_1155.6.1_OraM1_S90_L001_R1_001.fastq.gz
MZW20791_1155.6.1_E0578_1_OraM1_S90_L001_R2_001.fastq.gz	E0578.1.OraM1.S90	E0578-1-OraM1	AAMP29	AAMP29-1-OraM1	MZW20791_1155.6.1_OraM1_S90_L001_R2_001.fastq.gz
MZW20791_1155.8.1_E0578_1_RecM1_S69_L001_R1_001.fastq.gz	E0578.1.RecM1.S69	E0578-1-RecM1	AAMP29	AAMP29-1-RecM1	MZW20791_1155.8.1_RecM1_S69_L001_R1_001.fastq.gz
MZW20791_1155.8.1_E0578_1_RecM1_S69_L001_R2_001.fastq.gz	E0578.1.RecM1.S69	E0578-1-RecM1	AAMP29	AAMP29-1-RecM1	MZW20791_1155.8.1_RecM1_S69_L001_R2_001.fastq.gz
MZW20791_1156.2.1_E0578_2_VagM1_S93_L001_R1_001.fastq.gz	E0578.2.VagM1.S93	E0578-2-VagM1	AAMP29	AAMP29-2-VagM1	MZW20791_1156.2.1_VagM1_S93_L001_R1_001.fastq.gz
MZW20791_1156.2.1_E0578_2_VagM1_S93_L001_R2_001.fastq.gz	E0578.2.VagM1.S93	E0578-2-VagM1	AAMP29	AAMP29-2-VagM1	MZW20791_1156.2.1_VagM1_S93_L001_R2_001.fastq.gz
MZW20791_1156.6.1_E0578_2_OraM1_S81_L001_R1_001.fastq.gz	E0578.2.OraM1.S81	E0578-2-OraM1	AAMP29	AAMP29-2-OraM1	MZW20791_1156.6.1_OraM1_S81_L001_R1_001.fastq.gz
MZW20791_1156.6.1_E0578_2_OraM1_S81_L001_R2_001.fastq.gz	E0578.2.OraM1.S81	E0578-2-OraM1	AAMP29	AAMP29-2-OraM1	MZW20791_1156.6.1_OraM1_S81_L001_R2_001.fastq.gz
MZW20791_1156.8.1_E0578_2_RecM1_S48_L001_R1_001.fastq.gz	E0578.2.RecM1.S48	E0578-2-RecM1	AAMP29	AAMP29-2-RecM1	MZW20791_1156.8.1_RecM1_S48_L001_R1_001.fastq.gz
MZW20791_1156.8.1_E0578_2_RecM1_S48_L001_R2_001.fastq.gz	E0578.2.RecM1.S48	E0578-2-RecM1	AAMP29	AAMP29-2-RecM1	MZW20791_1156.8.1_RecM1_S48_L001_R2_001.fastq.gz
MZW20791_1159.2.1_E0580_1_VagM1_S90_L001_R1_001.fastq.gz	E0580.1.VagM1.S90	E0580-1-VagM1	AAMP30	AAMP30-1-VagM1	MZW20791_1159.2.1_VagM1_S90_L001_R1_001.fastq.gz
MZW20791_1159.2.1_E0580_1_VagM1_S90_L001_R2_001.fastq.gz	E0580.1.VagM1.S90	E0580-1-VagM1	AAMP30	AAMP30-1-VagM1	MZW20791_1159.2.1_VagM1_S90_L001_R2_001.fastq.gz
MZW20791_1159.6.1_E0580_1_OraM1_S78_L001_R1_001.fastq.gz	E0580.1.OraM1.S78	E0580-1-OraM1	AAMP30	AAMP30-1-OraM1	MZW20791_1159.6.1_OraM1_S78_L001_R1_001.fastq.gz
MZW20791_1159.6.1_E0580_1_OraM1_S78_L001_R2_001.fastq.gz	E0580.1.OraM1.S78	E0580-1-OraM1	AAMP30	AAMP30-1-OraM1	MZW20791_1159.6.1_OraM1_S78_L001_R2_001.fastq.gz
MZW20791_1159.8.1_E0580_1_RecM1_S69_L001_R1_001.fastq.gz	E0580.1.RecM1.S69	E0580-1-RecM1	AAMP30	AAMP30-1-RecM1	MZW20791_1159.8.1_RecM1_S69_L001_R1_001.fastq.gz
MZW20791_1159.8.1_E0580_1_RecM1_S69_L001_R2_001.fastq.gz	E0580.1.RecM1.S69	E0580-1-RecM1	AAMP30	AAMP30-1-RecM1	MZW20791_1159.8.1_RecM1_S69_L001_R2_001.fastq.gz
MZW20791_1160.2.1_E0580_2_VagM1_S93_L001_R1_001.fastq.gz	E0580.2.VagM1.S93	E0580-2-VagM1	AAMP30	AAMP30-2-VagM1	MZW20791_1160.2.1_VagM1_S93_L001_R1_001.fastq.gz
MZW20791_1160.2.1_E0580_2_VagM1_S93_L001_R2_001.fastq.gz	E0580.2.VagM1.S93	E0580-2-VagM1	AAMP30	AAMP30-2-VagM1	MZW20791_1160.2.1_VagM1_S93_L001_R2_001.fastq.gz
MZW20791_1160.6.1_E0580_2_OraM1_S81_L001_R1_001.fastq.gz	E0580.2.OraM1.S81	E0580-2-OraM1	AAMP30	AAMP30-2-OraM1	MZW20791_1160.6.1_OraM1_S81_L001_R1_001.fastq.gz
MZW20791_1160.6.1_E0580_2_OraM1_S81_L001_R2_001.fastq.gz	E0580.2.OraM1.S81	E0580-2-OraM1	AAMP30	AAMP30-2-OraM1	MZW20791_1160.6.1_OraM1_S81_L001_R2_001.fastq.gz
MZW20791_1160.8.1_E0580_2_RecM1_S72_L001_R1_001.fastq.gz	E0580.2.RecM1.S72	E0580-2-RecM1	AAMP30	AAMP30-2-RecM1	MZW20791_1160.8.1_RecM1_S72_L001_R1_001.fastq.gz
MZW20791_1160.8.1_E0580_2_RecM1_S72_L001_R2_001.fastq.gz	E0580.2.RecM1.S72	E0580-2-RecM1	AAMP30	AAMP30-2-RecM1	MZW20791_1160.8.1_RecM1_S72_L001_R2_001.fastq.gz
MZW20791_1176.2.1_E0591_1_VagM1_S49_L001_R1_001.fastq.gz	E0591.1.VagM1.S49	E0591-1-VagM1	AAMP31	AAMP31-1-VagM1	MZW20791_1176.2.1_VagM1_S49_L001_R1_001.fastq.gz
MZW20791_1176.2.1_E0591_1_VagM1_S49_L001_R2_001.fastq.gz	E0591.1.VagM1.S49	E0591-1-VagM1	AAMP31	AAMP31-1-VagM1	MZW20791_1176.2.1_VagM1_S49_L001_R2_001.fastq.gz
MZW20791_1176.6.1_E0591_1_OraM1_S37_L001_R1_001.fastq.gz	E0591.1.OraM1.S37	E0591-1-OraM1	AAMP31	AAMP31-1-OraM1	MZW20791_1176.6.1_OraM1_S37_L001_R1_001.fastq.gz
MZW20791_1176.6.1_E0591_1_OraM1_S37_L001_R2_001.fastq.gz	E0591.1.OraM1.S37	E0591-1-OraM1	AAMP31	AAMP31-1-OraM1	MZW20791_1176.6.1_OraM1_S37_L001_R2_001.fastq.gz
MZW20791_1176.8.1_E0591_1_RecM1_S61_L001_R1_001.fastq.gz	E0591.1.RecM1.S61	E0591-1-RecM1	AAMP31	AAMP31-1-RecM1	MZW20791_1176.8.1_RecM1_S61_L001_R1_001.fastq.gz
MZW20791_1176.8.1_E0591_1_RecM1_S61_L001_R2_001.fastq.gz	E0591.1.RecM1.S61	E0591-1-RecM1	AAMP31	AAMP31-1-RecM1	MZW20791_1176.8.1_RecM1_S61_L001_R2_001.fastq.gz
MZW20791_1181.2.1_E0591_2_VagM1_S85_L001_R1_001.fastq.gz	E0591.2.VagM1.S85	E0591-2-VagM1	AAMP31	AAMP31-2-VagM1	MZW20791_1181.2.1_VagM1_S85_L001_R1_001.fastq.gz
MZW20791_1181.2.1_E0591_2_VagM1_S85_L001_R2_001.fastq.gz	E0591.2.VagM1.S85	E0591-2-VagM1	AAMP31	AAMP31-2-VagM1	MZW20791_1181.2.1_VagM1_S85_L001_R2_001.fastq.gz
MZW20791_1181.6.1_E0591_2_OraM1_S73_L001_R1_001.fastq.gz	E0591.2.OraM1.S73	E0591-2-OraM1	AAMP31	AAMP31-2-OraM1	MZW20791_1181.6.1_OraM1_S73_L001_R1_001.fastq.gz
MZW20791_1181.6.1_E0591_2_OraM1_S73_L001_R2_001.fastq.gz	E0591.2.OraM1.S73	E0591-2-OraM1	AAMP31	AAMP31-2-OraM1	MZW20791_1181.6.1_OraM1_S73_L001_R2_001.fastq.gz
MZW20791_1181.8.1_E0591_2_RecM1_S2_L001_R1_001.fastq.gz	E0591.2.RecM1.S2	E0591-2-RecM1	AAMP31	AAMP31-2-RecM1	MZW20791_1181.8.1_RecM1_S2_L001_R1_001.fastq.gz
MZW20791_1181.8.1_E0591_2_RecM1_S2_L001_R2_001.fastq.gz	E0591.2.RecM1.S2	E0591-2-RecM1	AAMP31	AAMP31-2-RecM1	MZW20791_1181.8.1_RecM1_S2_L001_R2_001.fastq.gz
MZW20791_1182.2.1_E0592_1_VagM1_S26_L001_R1_001.fastq.gz	E0592.1.VagM1.S26	E0592-1-VagM1	AAMP32	AAMP32-1-VagM1	MZW20791_1182.2.1_VagM1_S26_L001_R1_001.fastq.gz
MZW20791_1182.2.1_E0592_1_VagM1_S26_L001_R2_001.fastq.gz	E0592.1.VagM1.S26	E0592-1-VagM1	AAMP32	AAMP32-1-VagM1	MZW20791_1182.2.1_VagM1_S26_L001_R2_001.fastq.gz
MZW20791_1182.6.1_E0592_1_OraM1_S14_L001_R1_001.fastq.gz	E0592.1.OraM1.S14	E0592-1-OraM1	AAMP32	AAMP32-1-OraM1	MZW20791_1182.6.1_OraM1_S14_L001_R1_001.fastq.gz
MZW20791_1182.6.1_E0592_1_OraM1_S14_L001_R2_001.fastq.gz	E0592.1.OraM1.S14	E0592-1-OraM1	AAMP32	AAMP32-1-OraM1	MZW20791_1182.6.1_OraM1_S14_L001_R2_001.fastq.gz
MZW20791_1183.2.1_E0592_2_VagM1_S62_L001_R1_001.fastq.gz	E0592.2.VagM1.S62	E0592-2-VagM1	AAMP32	AAMP32-2-VagM1	MZW20791_1183.2.1_VagM1_S62_L001_R1_001.fastq.gz
MZW20791_1183.2.1_E0592_2_VagM1_S62_L001_R2_001.fastq.gz	E0592.2.VagM1.S62	E0592-2-VagM1	AAMP32	AAMP32-2-VagM1	MZW20791_1183.2.1_VagM1_S62_L001_R2_001.fastq.gz
MZW20791_1183.6.1_E0592_2_OraM1_S50_L001_R1_001.fastq.gz	E0592.2.OraM1.S50	E0592-2-OraM1	AAMP32	AAMP32-2-OraM1	MZW20791_1183.6.1_OraM1_S50_L001_R1_001.fastq.gz
MZW20791_1183.6.1_E0592_2_OraM1_S50_L001_R2_001.fastq.gz	E0592.2.OraM1.S50	E0592-2-OraM1	AAMP32	AAMP32-2-OraM1	MZW20791_1183.6.1_OraM1_S50_L001_R2_001.fastq.gz
MZW20791_1184.2.1_E0671_1_VagM1_S3_L001_R1_001.fastq.gz	E0671.1.VagM1.S3	E0671-1-VagM1	AAMP39	AAMP39-1-VagM1	MZW20791_1184.2.1_VagM1_S3_L001_R1_001.fastq.gz
MZW20791_1184.2.1_E0671_1_VagM1_S3_L001_R2_001.fastq.gz	E0671.1.VagM1.S3	E0671-1-VagM1	AAMP39	AAMP39-1-VagM1	MZW20791_1184.2.1_VagM1_S3_L001_R2_001.fastq.gz
MZW20791_1184.6.1_E0671_1_OraM1_S86_L001_R1_001.fastq.gz	E0671.1.OraM1.S86	E0671-1-OraM1	AAMP39	AAMP39-1-OraM1	MZW20791_1184.6.1_OraM1_S86_L001_R1_001.fastq.gz
MZW20791_1184.6.1_E0671_1_OraM1_S86_L001_R2_001.fastq.gz	E0671.1.OraM1.S86	E0671-1-OraM1	AAMP39	AAMP39-1-OraM1	MZW20791_1184.6.1_OraM1_S86_L001_R2_001.fastq.gz
MZW20791_1184.8.1_E0671_1_RecM1_S15_L001_R1_001.fastq.gz	E0671.1.RecM1.S15	E0671-1-RecM1	AAMP39	AAMP39-1-RecM1	MZW20791_1184.8.1_RecM1_S15_L001_R1_001.fastq.gz
MZW20791_1184.8.1_E0671_1_RecM1_S15_L001_R2_001.fastq.gz	E0671.1.RecM1.S15	E0671-1-RecM1	AAMP39	AAMP39-1-RecM1	MZW20791_1184.8.1_RecM1_S15_L001_R2_001.fastq.gz
MZW20791_1341.2.1_E0671_2_VagM1_S39_L001_R1_001.fastq.gz	E0671.2.VagM1.S39	E0671-2-VagM1	AAMP39	AAMP39-2-VagM1	MZW20791_1341.2.1_VagM1_S39_L001_R1_001.fastq.gz
MZW20791_1341.2.1_E0671_2_VagM1_S39_L001_R2_001.fastq.gz	E0671.2.VagM1.S39	E0671-2-VagM1	AAMP39	AAMP39-2-VagM1	MZW20791_1341.2.1_VagM1_S39_L001_R2_001.fastq.gz
MZW20791_1341.6.1_E0671_2_OraM1_S27_L001_R1_001.fastq.gz	E0671.2.OraM1.S27	E0671-2-OraM1	AAMP39	AAMP39-2-OraM1	MZW20791_1341.6.1_OraM1_S27_L001_R1_001.fastq.gz
MZW20791_1341.6.1_E0671_2_OraM1_S27_L001_R2_001.fastq.gz	E0671.2.OraM1.S27	E0671-2-OraM1	AAMP39	AAMP39-2-OraM1	MZW20791_1341.6.1_OraM1_S27_L001_R2_001.fastq.gz
MZW20791_1341.8.1_E0671_2_RecM1_S51_L001_R1_001.fastq.gz	E0671.2.RecM1.S51	E0671-2-RecM1	AAMP39	AAMP39-2-RecM1	MZW20791_1341.8.1_RecM1_S51_L001_R1_001.fastq.gz
MZW20791_1341.8.1_E0671_2_RecM1_S51_L001_R2_001.fastq.gz	E0671.2.RecM1.S51	E0671-2-RecM1	AAMP39	AAMP39-2-RecM1	MZW20791_1341.8.1_RecM1_S51_L001_R2_001.fastq.gz

## Sheet: dbGaP raw data
StudyPerson	dbGAPSubject	EDUCATION	INSURANCE	RELSTATUS	ABX_PRIORV1	ABX_V1TOV2	PRIORTERM	PRIORPRETERM	WKS	MATERNAL_AGE
E0504	AAMP1	1	0	0	0	0	0	0	19.86	31.71
E0506	AAMP2	0	0	1	0	0	0	0	14	19.17
E0508	AAMP3	0	0	1	0	0	0	0	15	22.87
E0511	AAMP4	1	0	0	0	0	0	0	11.14	20.7
E0513	AAMP5	0	0	0	0	0	0	0	14	32.21
E0524	AAMP6	1	0	0	1	0	1	0	13.72	32.68
E0532	AAMP7	1	1	0	1	1	1	1	17.29	21.47
E0537	AAMP8	1	1	0	1	0	1	0	19.43	32.34
E0538	AAMP9	1	1	0	1	0	1	0	16.72	25.37
E0545	AAMP10	1	1	0	1	0	1	0	17.5	25.14
E0551	AAMP11	0	0	0	0	0	0	0	18.29	24.33
E0553	AAMP12	1	0	1	1	0	1	0	11.85	25.32
E0554	AAMP13	1	0	1	0	0	0	0	12.71	27.67
E0559	AAMP14	0	0	0	0	0	0	0	11.9	32.96
E0561	AAMP15	1	0	0	1	0	1	0	14.43	35.91
E0562	AAMP16	1	1	0	1	1	1	1	12.58	28.27
E0563	AAMP17	1	0	1	0	0	0	0	16.43	21.09
E0565	AAMP18	1	0	0	0	0	0	0	12	30.48
E0566	AAMP19	0	1	0	0	0	0	0	16	28.91
E0567	AAMP20	0	0	0	0	0	0	0	12.71	26.05
E0568	AAMP21	1	1	1	2	0	1	0	15.28	23.23
E0569	AAMP22	0	0	0	0	0	0	0	12.57	24.96
E0570	AAMP23	0	0	0	0	0	0	0	9.43	21.72
E0571	AAMP24	0	0	0	0	0	0	0	14	22.96
E0572	AAMP25	1	0	1	2	1	1	1	14	35.15
E0574	AAMP26	0	0	1	0	0	0	0	16	23.13
E0575	AAMP27	1	0	0	0	1	0	1	13	24.47
E0576	AAMP28	1	0	0	0	0	0	0	10.28	22.83
E0578	AAMP29	0	0	0	0	0	0	0	15.86	24.22
E0580	AAMP30	1	1	1	2	0	1	0	17.7	25.97
E0591	AAMP31	1	1	0	3	0	1	0	9.71	30.95
E0592	AAMP32	0	1	1	0	0	0	0	17	24.36
E0649	AAMP33	1	0	1	0	0	0	0	12.6	25.96
E0650	AAMP34	0	0	0	0	0	0	0	12.9	27.38
E0651	AAMP35	1	0	0	1	0	1	0	11.7	24.38
E0654	AAMP36	1	0	0	1	0	1	0	9.5	34.57
E0655	AAMP37	1	1	0	3	0	1	0	10.3	26.15
E0657	AAMP38	1	0	0	1	0	1	0	15	29.67
E0671	AAMP39	1	0	0	2	0	1	0	9.86	30.57
E0688	AAMP40	1	1	1	1	0	1	0	11.5	28.07
G0011	AAMP41	1	1	0	1	2	1	1	14.29	28.96
G0012	AAMP42	1	1	1	0	1	0	1	14.28	20.79
G0014	AAMP43	0	1	0	0	0	0	0	13.14	18.89
G0015	AAMP44	1	1	0	1	2	1	1	12.57	21.33
G0016	AAMP45	1	1	1	0	0	0	0	16.71	23.86
G0017	AAMP46	0	1	1	0	0	0	0	17.29	21.8
G0022	AAMP47	0	1	1	0	0	0	0	16.1	15.8
G0026	AAMP48	0	1	0	0	0	0	0	13.29	20.29
G0027	AAMP49	1	1	1	1	0	1	0	17	18.2
G0028	AAMP50	1	1	0	1	0	1	0	21	25.65
G0029	AAMP51	0	1	1	0	0	0	0	20.28	21.99
G0030	AAMP52	1	1	1	1	0	1	0	15.86	19.01
G0033	AAMP53	0	1	1	0	0	0	0	13.71	19.08
G0035	AAMP54	0	1	0	0	0	0	0	20	31.76
G0037	AAMP55	0	1	0	0	0	0	0	16.14	20.26
G0038	AAMP56	0	1	1	0	0	0	0	20.57	20.86
G0039	AAMP57	1	1	0	1	0	1	0	22.15	21.14
G0040	AAMP58	0	1	1	0	0	0	0	13	19.22
G0042	AAMP59	1	1	1	2	0	1	0	19	25.73
G0044	AAMP60	1	1	0	1	0	1	0	19.43	21.26
G0046	AAMP61	1	1	0	1	0	1	0	17	18.65
G0047	AAMP62	1	1	1	1	1	1	1	22.14	22.84
G0048	AAMP63	0	1	1	0	0	0	0	21.57	18.07
G0050	AAMP64	1	1	0	1	0	1	0	16	28.6
G0051	AAMP65	1	1	0	1	0	1	0	14.29	32.24
G0053	AAMP66	0	1	1	0	0	0	0	12.14	22.89
G0054	AAMP67	1	1	0	2	0	1	0	20.86	27.3
G0055	AAMP68	1	1	1	2	0	1	0	17.29	25.9
G0056	AAMP69	0	1	0	0	0	0	0	20	19.8
G0059	AAMP70	0	1	0	0	0	0	0	17.57	24.19
G0061	AAMP71	0	1	0	0	0	0	0	14	22.8
G0062	AAMP72	1	1	0	2	0	1	0	25	23.47
G0063	AAMP73	0	1	1	0	0	0	0	12.14	19.12
G0064	AAMP74	1	1	1	0	0	0	0	13	19.89
G0065	AAMP75	1	1	1	0	0	0	0	16.28	27.44
G0066	AAMP76	1	1	1	0	1	0	1	13.57	24.49
G0067	AAMP77	1	1	1	0	0	0	0	15.86	22.12
G0068	AAMP78	1	1	1	2	1	1	1	20.29	23.37
G0070	AAMP79	0	1	1	0	0	0	0	19.85	18.11
G0071	AAMP80	1	1	0	1	0	1	0	13.14	22.48
G0072	AAMP81	1	1	1	1	0	1	0	15.29	24.35
G0073	AAMP82	0	1	1	0	0	0	0	12.14	19.9
G0074	AAMP83	0	1	1	0	0	0	0	16.86	21.43
G0076	AAMP84	0	1	1	0	0	0	0	11.29	22.67
G0077	AAMP85	1	1	0	2	0	1	0	15.14	22.93
G0078	AAMP86	1	1	0	3	0	1	0	12	33.86
G0079	AAMP87	0	1	1	0	0	0	0	14.14	21.1
G0080	AAMP88	0	1	0	0	0	0	0	17	20.93
G0081	AAMP89	1	1	1	0	1	0	1	13.43	25.92
G0083	AAMP90	1	1	0	1	0	1	0	17	24.51
G0084	AAMP91	1	1	0	1	0	1	0	14.29	22.95
G0086	AAMP92	0	1	0	0	0	0	0	19.1	21.29
G0088	AAMP93	1	1	1	1	1	1	1	19.43	26.56
G0089	AAMP94	1	1	0	4	0	1	0	17.29	26.69
G0090	AAMP95	1	1	0	0	0	0	0	16.28	19.73
G0091	AAMP96	0	1	1	0	0	0	0	12.86	22.11
G0092	AAMP97	0	1	0	0	0	0	0	17.72	20.71
G0093	AAMP98	1	1	0	0	1	0	1	18	32.56
G0098	AAMP99	1	1	1	0	0	0	0	10	20.31
G0099	AAMP100	1	1	0	3	0	1	0	16.72	26.67
G0100	AAMP101	1	1	1	1	0	1	0	13	26.78
G0101	AAMP102	1	1	0	0	2	0	1	15.71	23.3
G0102	AAMP103	0	1	0	0	0	0	0	12	19.17
G0103	AAMP104	1	1	1	1	0	1	0	14.85	21.32
G0105	AAMP105	0	1	0	0	0	0	0	20	19.97
G0110	AAMP106	1	1	0	3	0	1	0	17.2	33.59
G0111	AAMP107	1	1	0	1	0	1	0	16.3	25.72
G0123	AAMP108	1	1	0	1	0	1	0	17.1	20.13
G0124	AAMP109	1	1	0	1	0	1	0	12.2	23.39
G0198	AAMP110	1	1	1	2	0	1	0	14.9	22.45
G0199	AAMP111	1	1	1	3	0	1	0	14.2	24.93
G0200	AAMP112	1	1	1	2	0	1	0	13	23.19
G0201	AAMP113	1	1	1	3	0	1	0	16.9	23.28
G0203	AAMP114	0	1	1	0	0	0	0	14.7	30.56
G0204	AAMP115	1	1	0	1	0	1	0	15.8	22.43
G0207	AAMP116	1	1	0	2	0	1	0	13.6	28.94
G0208	AAMP117	0	1	1	0	0	0	0	10	32.76
G0209	AAMP118	1	1	1	1	0	1	0	13.7	33.41
G0210	AAMP119	1	1	1	2	0	1	0	16.1	31.56
G0224	AAMP120	1	1	1	1	0	1	0	12.8	20.16
G0225	AAMP121	1	1	1	0	0	0	0	12.1	23.35
G0236	AAMP122	1	1	1	1	0	1	0	9.7	19.6

## Sheet: dbGaP data dictionary
VARNAME	VARDESC	DOCFILE	TYPE	UNITS	MIN	MAX	RESOLUTION	COMMENT1	COMMENT2	VARIABLE_SOURCE	SOURCE_VARIABLE_ID	VARIABLE_MAPPING	UNIQUEKEY	COLLINTERVAL	ORDER	VALUES
SUBJECT_ID	Subject ID		string										X	Collected in Visit 1
EDUCATION	Level of Education		encoded value											Collected in Visit 1		0=More than High School	1=High school or less
INSURANCE	Prenatal insurance status		integer											Collected in Visit 1		0=Private Insurance	1=Medicaid
RELSTATUS	Relationship Status		integer											Collected in Visit 1		0=Married/Cohabitating	1=Single
ABX_PRIORV1	Antibiotics prior to visit 1		integer											Collected in Visit 1		0=No antibiotics prior to visit 1	1= Antibiotics prior to visit 1
ABX_V1TOV2	Antibiotics prior to visit 2		integer											Collected in Visit 1		0=No antibiotics between visit 1 and visit 2
PRIORTERM	Prior term birth		integer											Collected in Visit 1		0= No prior term birth	1=prior term birth
PRIORPRETERM	Prior preterm birth		integer											Collected in Visit 1		0=No prior preterm birth	1=prior preterm birth
WKS	Weeks between sample collection		decimal	weeks										Collected in Visit 1, 2
MATERNAL_AGE	Maternal age		decimal	years	18	45								Collected in Visit 1
